# Supplementary material for: Tetranuclear iron carbonyl complexes with a central tin atom: relationship to iron carbonyl carbides
Source: Royal Society of Chemistry journal article supplement (doi:10.1039/c8nj01434e), 2018-01-01
Supplement: c8nj01434e1.pdf [file c8nj01434e1.pdf]

# Tetranuclear Iron Carbonyl Complexes with a Central Tin Atom: Relationship to Iron Carbonyl Carbides

Xiaoli Gong,<sup>a</sup> Liyao Zhu,<sup>\*a</sup> Jufeng Zhao,<sup>a</sup> Guangmang Cui,<sup>a</sup> Xinmiao Lu,<sup>a</sup>  
Yaoming Xie,<sup>b</sup> and R. Bruce King,<sup>\*b</sup>

<sup>a</sup>*College of Electronics and Information, Hangzhou Dianzi University,  
Hangzhou, Zhejiang 310018, P. R China*

<sup>b</sup>*Department of Chemistry and Center for Computational Quantum Chemistry,  
University of Georgia, Athens, Georgia 30602, USA  
e-mails: [rbking@chem.uga.edu](mailto:rbking@chem.uga.edu) and [zly@hdu.edu.cn](mailto:zly@hdu.edu.cn)*

## Supporting Information

**Tables S1 to S15:** Theoretical Cartesian coordinates for the structures of  $\text{SnFe}_4(\text{CO})_n$  ( $n=16-12$ ) using the M06-L/TZP and BP86/DZP methods.

**Tables S16 to S30:** Theoretical harmonic vibrational frequencies for the structures of  $\text{SnFe}_4(\text{CO})_n$  ( $n=16-12$ ) using the M06-L/TZP and BP86/DZP methods.

**Tables S31 to S34:** Metal- Metal Distances, Natural Population Analysis Natural Charges, Metal Electron Configuration, Formal Metal-Metal Bond Orders, and WBIs for the  $\text{SnFe}_4(\text{CO})_n$  ( $n = 16$  to  $12$ ) Structures Using the M06-L/TZP and BP86/DZP Methods.

Table S35.  $\nu(\text{CO})$  Frequencies (in  $\text{cm}^{-1}$ ) and IR Intensities (in  $\text{km/mol}$ ) in Parentheses for the  $\text{SnFe}_4(\text{CO})_n$  ( $n = 16$  to  $12$ ) Structures are calculated by using the BP86/DZP Method except for 14S-3 and 12S-2 which are calculated by M06-L/TZP because the corresponding isomers are not optimized by BP86/DZP. Bridging  $\nu(\text{CO})$  frequencies are given in bold type, whereas weakly semibridging  $\nu(\text{CO})$  frequencies are given in italic type.

Complete Gaussian09 reference (reference 15).

**Table S1.** Theoretical Cartesian coordinates (in Å) for the structure **16S-1** using the M06-L/TZP and BP86/DZP methods

| M06-L/TZP |             |             |             | BP86/DZP |             |             |             |
|-----------|-------------|-------------|-------------|----------|-------------|-------------|-------------|
| Fe        | 0.00000000  | -1.43623800 | 2.07011100  | Fe       | 0.00000000  | -1.44895800 | 2.04725400  |
| Fe        | 0.00000000  | 1.43623800  | 2.07011100  | Fe       | 0.00000000  | 1.44895800  | 2.04725400  |
| C         | 1.77805400  | 1.39340400  | 1.77220900  | C        | 1.79073000  | 1.43656900  | 1.87153300  |
| C         | 0.00000000  | 3.12765100  | 1.54589000  | C        | 0.00000000  | 3.11797300  | 1.46860500  |
| C         | -1.77805400 | 1.39340400  | 1.77220900  | C        | -1.79073000 | 1.43656900  | 1.87153300  |
| C         | 1.77805400  | -1.39340400 | 1.77220900  | C        | 1.79073000  | -1.43656900 | 1.87153300  |
| C         | 0.00000000  | -3.12765100 | 1.54589000  | C        | 0.00000000  | -3.11797300 | 1.46860500  |
| C         | -1.77805400 | -1.39340400 | 1.77220900  | C        | -1.79073000 | -1.43656900 | 1.87153300  |
| O         | -2.89905100 | 1.46555200  | 1.54535500  | O        | -2.94909400 | 1.53497700  | 1.75901400  |
| O         | 0.00000000  | 4.22479200  | 1.22417000  | O        | 0.00000000  | 4.23672300  | 1.13271400  |
| O         | 2.89905100  | 1.46555200  | 1.54535500  | O        | 2.94909400  | 1.53497700  | 1.75901400  |
| O         | 2.89905100  | -1.46555200 | 1.54535500  | O        | 2.94909400  | -1.53497700 | 1.75901400  |
| O         | 0.00000000  | -4.22479200 | 1.22417000  | O        | 0.00000000  | -4.23672300 | 1.13271400  |
| O         | -2.89905100 | -1.46555200 | 1.54535500  | O        | -2.94909400 | -1.53497700 | 1.75901400  |
| C         | 0.00000000  | -1.52318400 | 3.87375600  | C        | 0.00000000  | -1.57623300 | 3.84179300  |
| O         | 0.00000000  | -1.62722100 | 5.01170100  | O        | 0.00000000  | -1.71690900 | 4.99966300  |
| C         | 0.00000000  | 1.52318400  | 3.87375600  | C        | 0.00000000  | 1.57623300  | 3.84179300  |
| O         | 0.00000000  | 1.62722100  | 5.01170100  | O        | 0.00000000  | 1.71690900  | 4.99966300  |
| O         | -1.46555200 | -2.89905100 | -1.54535500 | O        | -1.53497700 | -2.94909400 | -1.75901400 |
| C         | -1.39340400 | -1.77805400 | -1.77220900 | C        | -1.43656900 | -1.79073000 | -1.87153300 |
| Fe        | -1.43623800 | 0.00000000  | -2.07011100 | Fe       | -1.44895800 | 0.00000000  | -2.04725400 |
| C         | -3.12765100 | 0.00000000  | -1.54589000 | C        | -3.11797300 | 0.00000000  | -1.46860500 |
| C         | -1.39340400 | 1.77805400  | -1.77220900 | C        | -1.43656900 | 1.79073000  | -1.87153300 |
| C         | -1.52318400 | 0.00000000  | -3.87375600 | C        | -1.57623300 | 0.00000000  | -3.84179300 |
| O         | -4.22479200 | 0.00000000  | -1.22417000 | O        | -4.23672300 | 0.00000000  | -1.13271400 |
| O         | -1.46555200 | 2.89905100  | -1.54535500 | O        | -1.53497700 | 2.94909400  | -1.75901400 |
| O         | -1.62722100 | 0.00000000  | -5.01170100 | O        | -1.71690900 | 0.00000000  | -4.99966300 |
| Fe        | 1.43623800  | 0.00000000  | -2.07011100 | Fe       | 1.44895800  | 0.00000000  | -2.04725400 |
| C         | 1.39340400  | -1.77805400 | -1.77220900 | C        | 1.43656900  | -1.79073000 | -1.87153300 |
| C         | 3.12765100  | 0.00000000  | -1.54589000 | C        | 3.11797300  | 0.00000000  | -1.46860500 |
| C         | 1.39340400  | 1.77805400  | -1.77220900 | C        | 1.43656900  | 1.79073000  | -1.87153300 |
| C         | 1.52318400  | 0.00000000  | -3.87375600 | C        | 1.57623300  | 0.00000000  | -3.84179300 |
| O         | 1.46555200  | -2.89905100 | -1.54535500 | O        | 1.53497700  | -2.94909400 | -1.75901400 |
| O         | 4.22479200  | 0.00000000  | -1.22417000 | O        | 4.23672300  | 0.00000000  | -1.13271400 |
| O         | 1.46555200  | 2.89905100  | -1.54535500 | O        | 1.53497700  | 2.94909400  | -1.75901400 |
| O         | 1.62722100  | 0.00000000  | -5.01170100 | O        | 1.71690900  | 0.00000000  | -4.99966300 |
| Sn        | 0.00000000  | 0.00000000  | 0.00000000  | Sn       | 0.00000000  | 0.00000000  | 0.00000000  |

**Table S2.** Theoretical Cartesian coordinates (in Å) for the structure **16S-2** using the M06-L/TZP and BP86/DZP methods.

| M06-L/TZP |             |             |             | BP86/DZP |             |             |             |
|-----------|-------------|-------------|-------------|----------|-------------|-------------|-------------|
| Fe        | 0.00000000  | 1.43818600  | 2.11445300  | Fe       | 0.00000000  | 1.45167300  | 2.08746300  |
| Fe        | 0.00000000  | -1.43818600 | 2.11445300  | Fe       | 0.00000000  | -1.45167300 | 2.08746300  |
| Fe        | -1.30032300 | 0.00000000  | -2.11140100 | Fe       | -1.29995000 | 0.00000000  | -2.09074900 |
| Fe        | 1.30032300  | 0.00000000  | -2.11140100 | Fe       | 1.29995000  | 0.00000000  | -2.09074900 |
| C         | -2.23757100 | -1.35484400 | -1.38105400 | C        | -2.26730300 | -1.35077300 | -1.40752000 |
| C         | 0.00000000  | 1.42120600  | -2.67438900 | C        | 0.00000000  | 1.37670200  | -2.74508200 |
| C         | -2.23757100 | 1.35484400  | -1.38105400 | C        | -2.26730300 | 1.35077300  | -1.40752000 |
| C         | 2.23757100  | 1.35484400  | -1.38105400 | C        | 2.26730300  | 1.35077300  | -1.40752000 |
| C         | 2.23757100  | -1.35484400 | -1.38105400 | C        | 2.26730300  | -1.35077300 | -1.40752000 |
| C         | 0.00000000  | -1.42120600 | -2.67438900 | C        | 0.00000000  | -1.37670200 | -2.74508200 |
| C         | -1.80525700 | -1.38593600 | 2.02871100  | C        | -1.80206300 | -1.43053900 | 2.05897800  |
| C         | 0.00000000  | -2.96272200 | 1.20315200  | C        | 0.00000000  | -3.00769300 | 1.24338600  |
| C         | 1.80525700  | -1.38593600 | 2.02871100  | C        | 1.80206300  | -1.43053900 | 2.05897800  |
| C         | -1.80525700 | 1.38593600  | 2.02871100  | C        | -1.80206300 | 1.43053900  | 2.05897800  |
| C         | 0.00000000  | 2.96272200  | 1.20315200  | C        | 0.00000000  | 3.00769300  | 1.24338600  |
| C         | 1.80525700  | 1.38593600  | 2.02871100  | C        | 1.80206300  | 1.43053900  | 2.05897800  |
| O         | 2.94625000  | -1.43884600 | 1.98492400  | O        | 2.96491000  | -1.51756200 | 2.07483900  |
| O         | 0.00000000  | -3.93435700 | 0.59792300  | O        | 0.00000000  | -4.04688800 | 0.70993600  |
| O         | -2.94625000 | -1.43884600 | 1.98492400  | O        | -2.96491000 | -1.51756200 | 2.07483900  |
| O         | -2.94625000 | 1.43884600  | 1.98492400  | O        | -2.96491000 | 1.51756200  | 2.07483900  |
| O         | 0.00000000  | 3.93435700  | 0.59792300  | O        | 0.00000000  | 4.04688800  | 0.70993600  |
| O         | 2.94625000  | 1.43884600  | 1.98492400  | O        | 2.96491000  | 1.51756200  | 2.07483900  |
| O         | 2.86177100  | 2.22119800  | -0.96877900 | O        | 2.95778500  | 2.21878800  | -1.04095700 |
| O         | 2.86177100  | -2.22119800 | -0.96877900 | O        | 2.95778500  | -2.21878800 | -1.04095700 |
| O         | 0.00000000  | -2.51161200 | -3.07750800 | O        | 0.00000000  | -2.44876200 | -3.25100700 |
| O         | -2.86177100 | -2.22119800 | -0.96877900 | O        | -2.95778500 | -2.21878800 | -1.04095700 |
| O         | 0.00000000  | 2.51161200  | -3.07750800 | O        | 0.00000000  | 2.44876200  | -3.25100700 |
| O         | -2.86177100 | 2.22119800  | -0.96877900 | O        | -2.95778500 | 2.21878800  | -1.04095700 |
| C         | 0.00000000  | 1.68596600  | 3.89814500  | C        | 0.00000000  | 1.72436600  | 3.86319900  |
| O         | 0.00000000  | 1.85881600  | 5.02785100  | O        | 0.00000000  | 1.94311900  | 5.00883800  |
| C         | -2.04710600 | 0.00000000  | -3.74334000 | C        | -2.08249600 | 0.00000000  | -3.70141300 |
| C         | 2.04710600  | 0.00000000  | -3.74334000 | C        | 2.08249600  | 0.00000000  | -3.70141300 |
| O         | 2.56907300  | 0.00000000  | -4.75951700 | O        | 2.65250500  | 0.00000000  | -4.71864500 |
| O         | -2.56907300 | 0.00000000  | -4.75951700 | O        | -2.65250500 | 0.00000000  | -4.71864500 |
| C         | 0.00000000  | -1.68596600 | 3.89814500  | C        | 0.00000000  | -1.72436600 | 3.86319900  |
| O         | 0.00000000  | -1.85881600 | 5.02785100  | O        | 0.00000000  | -1.94311900 | 5.00883800  |
| Sn        | 0.00000000  | 0.00000000  | 0.05916100  | Sn       | 0.00000000  | 0.00000000  | 0.07089200  |

**Table S3.** Theoretical Cartesian coordinates (in Å) for the structure **15S-1** using the M06-L/TZP and BP86/DZP methods.

| M06-L/TZP |             |             |             | BP86/DZP |             |             |             |
|-----------|-------------|-------------|-------------|----------|-------------|-------------|-------------|
| Fe        | -0.00470100 | 2.38071400  | 1.26200600  | Fe       | 0.00872300  | 2.30871700  | 1.33303100  |
| Fe        | 0.40161200  | 1.31357400  | -1.42173000 | Fe       | 0.39163200  | 1.32040500  | -1.47860100 |
| Fe        | -0.40161200 | -1.31357400 | -1.42173000 | Fe       | -0.39163200 | -1.32040500 | -1.47860100 |
| Fe        | 0.00470100  | -2.38071400 | 1.26200600  | Fe       | -0.00872300 | -2.30871700 | 1.33303100  |
| C         | 0.00000000  | 0.00000000  | -2.82443400 | C        | 0.00000000  | 0.00000000  | -2.85816800 |
| C         | 1.78631700  | -2.09392200 | 1.16177800  | C        | 1.77780300  | -2.12630800 | 1.24086600  |
| C         | 1.25868900  | -2.02018300 | -1.65178500 | C        | 1.25549700  | -2.03552400 | -1.70587700 |
| C         | 0.07825500  | -2.64445100 | 3.02122500  | C        | 0.04862700  | -2.38265500 | 3.10560100  |
| C         | -1.78674400 | -2.15952600 | 1.31649200  | C        | -1.80518300 | -2.20068900 | 1.36856800  |
| C         | -2.09181800 | -0.71345900 | -1.21209700 | C        | -2.11440300 | -0.81881200 | -1.36569600 |
| C         | 1.05007300  | 2.68803400  | -2.32890400 | C        | 0.98867200  | 2.71375700  | -2.38752000 |
| C         | -1.25868900 | 2.02018300  | -1.65178500 | C        | -1.25549700 | 2.03552400  | -1.70587700 |
| C         | -1.78631700 | 2.09392200  | 1.16177800  | C        | -1.77780300 | 2.12630800  | 1.24086600  |
| C         | 2.09181800  | 0.71345900  | -1.21209700 | C        | 2.11440300  | 0.81881200  | -1.36569600 |
| C         | 1.78674400  | 2.15952600  | 1.31649200  | C        | 1.80518300  | 2.20068900  | 1.36856800  |
| C         | -0.07825500 | 2.64445100  | 3.02122500  | C        | -0.04862700 | 2.38265500  | 3.10560100  |
| O         | -2.91519400 | 1.89422700  | 1.14682100  | O        | -2.94227800 | 2.01810900  | 1.23692000  |
| O         | -2.26989800 | 2.51179000  | -1.86044600 | O        | -2.27399500 | 2.55445000  | -1.93990800 |
| O         | 1.48056300  | 3.57129700  | -2.91746800 | O        | 1.39533200  | 3.62363500  | -2.99861700 |
| O         | 3.18078800  | 0.36872100  | -1.12182700 | O        | 3.25007300  | 0.54393200  | -1.35294700 |
| O         | 2.92002300  | 2.02045200  | 1.42329800  | O        | 2.96962700  | 2.16391300  | 1.46550000  |
| O         | -0.11792800 | 2.83114800  | 4.14891700  | O        | -0.08035200 | 2.46597900  | 4.27052000  |
| O         | 0.11792800  | -2.83114800 | 4.14891700  | O        | 0.08035200  | -2.46597900 | 4.27052000  |
| O         | -2.92002300 | -2.02045200 | 1.42329800  | O        | -2.96962700 | -2.16391300 | 1.46550000  |
| O         | -3.18078800 | -0.36872100 | -1.12182700 | O        | -3.25007300 | -0.54393200 | -1.35294700 |
| O         | 0.00000000  | 0.00000000  | -3.99292200 | O        | 0.00000000  | 0.00000000  | -4.05042600 |
| O         | 2.91519400  | -1.89422700 | 1.14682100  | O        | 2.94227800  | -2.01810900 | 1.23692000  |
| O         | 2.26989800  | -2.51179000 | -1.86044600 | O        | 2.27399500  | -2.55445000 | -1.93990800 |
| C         | 0.00633200  | 3.98929200  | 0.44656800  | C        | 0.00782400  | 3.98490800  | 0.68454900  |
| O         | 0.00000000  | 5.01782100  | -0.05262900 | O        | 0.00000000  | 5.08835100  | 0.30606100  |
| C         | -1.05007300 | -2.68803400 | -2.32890400 | C        | -0.98867200 | -2.71375700 | -2.38752000 |
| C         | -0.00633200 | -3.98929200 | 0.44656800  | C        | -0.00782400 | -3.98490800 | 0.68454900  |
| O         | 0.00000000  | -5.01782100 | -0.05262900 | O        | 0.00000000  | -5.08835100 | 0.30606100  |
| O         | -1.48056300 | -3.57129700 | -2.91746800 | O        | -1.39533200 | -3.62363500 | -2.99861700 |
| Sn        | 0.00000000  | 0.00000000  | 0.71779200  | Sn       | 0.00000000  | 0.00000000  | 0.60071500  |

**Table S4.** Theoretical Cartesian coordinates (in Å) for the structure **15S-2** using the M06-L/TZP and BP86/DZP methods.

| M06-L/TZP |             |             | BP86/DZP    |    |             |             |             |
|-----------|-------------|-------------|-------------|----|-------------|-------------|-------------|
| Fe        | -1.89631900 | 0.02127100  | -1.04523700 | Fe | 1.86434200  | -0.56919300 | -0.88788600 |
| Fe        | -3.55568200 | 0.09226200  | 0.73012900  | Fe | 3.60557400  | 0.27849600  | 0.62305800  |
| Fe        | 2.22906300  | -1.47145700 | 0.30771900  | Fe | -2.26903300 | 1.51148700  | -0.25724000 |
| Fe        | 2.62925900  | 1.33890800  | 0.08775600  | Fe | -2.54054300 | -1.22238700 | 0.54674100  |
| C         | 1.02327300  | -2.73942900 | 0.59389200  | C  | -1.29963100 | 2.98728400  | -0.38095500 |
| C         | 3.10837700  | 0.81316700  | -1.56892200 | C  | -3.21176900 | -1.26934800 | -1.12274400 |
| C         | 2.19870500  | -1.83253700 | -1.46573200 | C  | -2.16966500 | 1.26202100  | -2.03834400 |
| C         | 2.53476900  | 3.01479900  | -0.48954300 | C  | -2.16798900 | -2.94957500 | 0.43781400  |
| C         | 1.74991500  | 1.85074600  | 1.59583200  | C  | -1.72412200 | -1.15718800 | 2.16135900  |
| C         | 2.02661200  | -0.90951600 | 2.01536200  | C  | -2.22123200 | 1.63061600  | 1.54187000  |
| C         | -4.66298600 | 1.48926100  | 0.62847500  | C  | 5.29068600  | -0.38444700 | 0.62706200  |
| C         | -4.82795900 | -1.17689300 | 0.72661400  | C  | 4.00327500  | 1.95961000  | 0.25365200  |
| C         | -1.67061700 | 0.15864600  | 0.83984900  | C  | 1.73284200  | 0.16840400  | 0.87252100  |
| C         | -3.72891200 | -0.05587100 | -1.31711300 | C  | 3.69029100  | -0.45192900 | -1.29415000 |
| C         | -1.49948600 | -1.45476100 | -1.94144200 | C  | 1.50141300  | -0.27847600 | -2.61430200 |
| C         | -1.64573700 | 1.17153000  | -2.39113500 | C  | 1.74737500  | -2.31823100 | -0.93067200 |
| O         | -0.70765800 | 0.24491500  | 1.61365200  | O  | 0.82443600  | 0.42597300  | 1.68844300  |
| O         | -5.61623400 | -2.00462700 | 0.73612600  | O  | 4.22810500  | 3.07838800  | 0.00215700  |
| O         | -5.34164400 | 2.40779500  | 0.56269500  | O  | 6.37770700  | -0.80109000 | 0.68768600  |
| O         | -4.60584900 | -0.13383200 | -2.08378300 | O  | 4.51841800  | -0.63083800 | -2.13058300 |
| O         | -1.24131800 | -2.44407900 | -2.46337200 | O  | 1.27620800  | -0.07178100 | -3.74386100 |
| O         | -1.48844400 | 1.93849000  | -3.22790500 | O  | 1.71502900  | -3.48985700 | -0.91844900 |
| O         | 2.49610600  | 4.09364500  | -0.86571700 | O  | -1.96556300 | -4.09748800 | 0.36982300  |
| O         | 1.24077200  | 2.27576900  | 2.52487700  | O  | -1.26382000 | -1.22653600 | 3.22908700  |
| O         | 1.88634700  | -0.65493600 | 3.12100300  | O  | -2.20406500 | 1.84018200  | 2.68956400  |
| O         | 0.22779200  | -3.53948800 | 0.78789000  | O  | -0.68609800 | 3.97807400  | -0.45559300 |
| O         | 3.42518900  | 0.58450100  | -2.64579000 | O  | -3.68921900 | -1.42569500 | -2.17791800 |
| O         | 2.13031300  | -2.11030700 | -2.57358100 | O  | -2.09689800 | 1.17263300  | -3.20035200 |
| C         | -3.36610000 | 0.12162700  | 2.51187100  | C  | 3.58527500  | 0.46124900  | 2.40215000  |
| O         | -3.25936800 | 0.14684300  | 3.64900500  | O  | 3.58764300  | 0.59421100  | 3.56058600  |
| C         | 3.89844000  | -2.09649400 | 0.58200800  | C  | -4.00002000 | 1.99955900  | -0.32030900 |
| C         | 4.25294300  | 1.13541800  | 0.84691100  | C  | -4.17597400 | -1.08420500 | 1.28566100  |
| O         | 5.28404500  | 1.02323100  | 1.32579100  | O  | -5.23360300 | -1.03852300 | 1.77365200  |
| O         | 4.94049200  | -2.52906000 | 0.76181100  | O  | -5.10680700 | 2.36162800  | -0.37797700 |
| Sn        | 0.48247800  | 0.18330700  | -0.37745500 | Sn | -0.45810400 | -0.17529600 | -0.27790600 |

**Table S5.** Theoretical Cartesian coordinates (in Å) for the structure **15T-1** using the M06-L/TZP and BP86/DZP methods.

| M06-L/TZP |             |             |             | BP86/DZP |             |             |             |
|-----------|-------------|-------------|-------------|----------|-------------|-------------|-------------|
| Fe        | 1.88768900  | -0.60011800 | 1.04997100  | Fe       | 1.79197500  | -0.40833900 | 0.89167900  |
| Fe        | 3.47782900  | 0.31616700  | -0.63307700 | Fe       | 3.68779100  | 0.19682400  | -0.53823200 |
| Fe        | -2.20760400 | 1.50536900  | 0.12000100  | Fe       | -2.29742400 | 1.51777500  | -0.02985100 |
| Fe        | -2.48814200 | -1.23854000 | -0.48818900 | Fe       | -2.53742300 | -1.31108200 | -0.31581800 |
| C         | -1.21770100 | 2.97893200  | 0.06901600  | C        | -1.38198200 | 3.01118900  | -0.28628900 |
| C         | -1.42567800 | -1.24934700 | -1.95975900 | C        | -1.63522600 | -1.48101600 | -1.86669200 |
| C         | -2.14323400 | 1.42255400  | -1.68641500 | C        | -2.42807800 | 1.28170100  | -1.81443000 |
| C         | -2.21490000 | -2.97878500 | -0.27765400 | C        | -2.10266400 | -2.95967300 | 0.15510400  |
| C         | -3.10338600 | -1.11225300 | 1.20449200  | C        | -3.19688500 | -1.00929600 | 1.33380000  |
| C         | -1.98325500 | 1.38589200  | 1.91413700  | C        | -2.00199900 | 1.59210400  | 1.74514000  |
| C         | 4.23811200  | -0.58289500 | -2.02451100 | C        | 4.63451500  | -0.79430400 | -1.70883600 |
| C         | 4.46946500  | 1.84081200  | -0.69067300 | C        | 4.71097800  | 1.67873900  | -0.60185900 |
| C         | 1.91946500  | 1.11733000  | 1.62668400  | C        | 1.94882100  | 1.32308600  | 1.38170700  |
| C         | 2.01767500  | 0.93112500  | -1.50021700 | C        | 2.38672100  | 0.74502100  | -1.66070000 |
| C         | 1.84060200  | -2.01029800 | -0.07916300 | C        | 1.90506800  | -1.94900100 | -0.03502600 |
| C         | 1.60586300  | -1.46933400 | 2.60798100  | C        | 1.48579700  | -1.13041400 | 2.49484100  |
| O         | 1.86554800  | 2.20692800  | 1.98963200  | O        | 2.00027000  | 2.44057800  | 1.73205700  |
| O         | 5.09087100  | 2.80026200  | -0.72435100 | O        | 5.38195000  | 2.63367700  | -0.65015800 |
| O         | 4.70739500  | -1.15547200 | -2.89598500 | O        | 5.25436600  | -1.42858700 | -2.46901600 |
| O         | 1.09352500  | 1.33480700  | -2.05890600 | O        | 1.57264900  | 1.11844800  | -2.41985800 |
| O         | 1.74455200  | -2.90078500 | -0.80096200 | O        | 1.92914600  | -2.96963700 | -0.61215000 |
| O         | 1.42473900  | -2.02561100 | 3.59200500  | O        | 1.33063700  | -1.61397700 | 3.54947800  |
| O         | -2.04558000 | -4.10067700 | -0.13322100 | O        | -1.84734400 | -4.05567400 | 0.46803300  |
| O         | -3.51026300 | -1.13968800 | 2.27663300  | O        | -3.66288900 | -0.94605700 | 2.40426100  |
| O         | -1.80184500 | 1.36331200  | 3.04597500  | O        | -1.80541400 | 1.71507100  | 2.89122400  |
| O         | -0.58385100 | 3.92895700  | 0.00610400  | O        | -0.80915500 | 4.01252400  | -0.46736900 |
| O         | -0.73942800 | -1.31690300 | -2.87518100 | O        | -1.05370600 | -1.66148100 | -2.86454700 |
| O         | -2.11071300 | 1.49370800  | -2.82871700 | O        | -2.53111300 | 1.27490600  | -2.97829800 |
| C         | 4.36621800  | -0.52174700 | 0.72367700  | C        | 4.37413400  | -0.50489300 | 0.99050200  |
| O         | 5.01829700  | -1.02249500 | 1.52722100  | O        | 4.93286700  | -0.93449100 | 1.92677200  |
| C         | -3.95718700 | 1.95691300  | 0.16652100  | C        | -4.03037700 | 1.98507700  | 0.12275400  |
| C         | -4.09008800 | -1.05028100 | -1.30783700 | C        | -4.16820300 | -1.42145500 | -1.07705100 |
| O         | -5.10141600 | -0.93869200 | -1.82685700 | O        | -5.21624600 | -1.54333500 | -1.57263500 |
| O         | -5.05719300 | 2.26313700  | 0.20284500  | O        | -5.13694600 | 2.33525000  | 0.23218400  |
| Sn        | -0.38606000 | -0.19665700 | 0.36092200  | Sn       | -0.44968400 | -0.10187100 | 0.22800400  |

**Table S6.** Theoretical Cartesian coordinates (in Å) for the structure **14S-1** using the M06-L/TZP and BP86/DZP methods.

| M06-L/TZP |             |             |             | BP86/DZP |             |             |             |
|-----------|-------------|-------------|-------------|----------|-------------|-------------|-------------|
| Fe        | 2.59878200  | 0.01490700  | -0.35281700 | Fe       | -2.62725400 | -0.04812900 | -0.42123700 |
| Fe        | 0.17384900  | -0.21153800 | 1.35308000  | Fe       | -0.17031200 | 0.20400500  | 1.37774500  |
| Fe        | -1.41826000 | 1.46672900  | -0.23415600 | Fe       | 1.52269800  | -1.41280100 | -0.23098900 |
| Fe        | -1.72273600 | -1.19645400 | -0.46588900 | Fe       | 1.65316000  | 1.24393500  | -0.49889400 |
| C         | -0.98617200 | 2.21510400  | 1.32027700  | C        | 1.46052300  | -2.23281100 | 1.33703800  |
| C         | -0.32282900 | 2.42242600  | -1.29116100 | C        | 0.47954300  | -2.55875100 | -1.12392500 |
| C         | -0.72612700 | -2.52523200 | -1.11331100 | C        | 0.62821700  | 2.48967400  | -1.25065600 |
| C         | -2.59317500 | -2.19333600 | 0.72351400  | C        | 2.30800500  | 2.35932000  | 0.72097600  |
| C         | -2.84499000 | 0.41096600  | 0.44650200  | C        | 2.87259300  | -0.14578000 | 0.36866800  |
| C         | 1.21098500  | 0.60043600  | 2.55707500  | C        | -1.11981000 | -0.85081900 | 2.44736400  |
| C         | -1.15271000 | -0.40988600 | 2.51160200  | C        | 1.12256400  | 0.38224200  | 2.56177400  |
| C         | 0.71422700  | -1.89170700 | 1.47830600  | C        | -0.87100500 | 1.77128500  | 1.79341900  |
| C         | 2.21026300  | 1.71939600  | 0.14007100  | C        | -2.41501400 | -1.79349800 | -0.01657200 |
| C         | 3.69939700  | 0.49003600  | -1.68121300 | C        | -3.61660300 | -0.37369300 | -1.86617400 |
| C         | 2.56894100  | -1.74779900 | -0.79161500 | C        | -2.62055200 | 1.74125800  | -0.67085300 |
| O         | 1.03699200  | -2.98565600 | 1.61685300  | O        | -1.30152900 | 2.80051100  | 2.15115700  |
| O         | -1.94511400 | -0.54311000 | 3.32836400  | O        | 1.89292400  | 0.51177100  | 3.43211200  |
| O         | 1.85134600  | 1.07431000  | 3.38105800  | O        | -1.71339800 | -1.48145700 | 3.23482900  |
| O         | 2.07256300  | 2.81312600  | 0.44167700  | O        | -2.38805400 | -2.92841400 | 0.24167100  |
| O         | 4.40334100  | 0.80252700  | -2.52268000 | O        | -4.27647100 | -0.59090400 | -2.80199100 |
| O         | 2.62322500  | -2.85014900 | -1.08115800 | O        | -2.72477100 | 2.88892800  | -0.83244000 |
| O         | -0.22206600 | -3.48150700 | -1.50272800 | O        | 0.10686000  | 3.41876800  | -1.74093800 |
| O         | -3.14601000 | -2.88323100 | 1.44798500  | O        | 2.74053100  | 3.15328500  | 1.45858700  |
| O         | -3.86226600 | 0.39258200  | 1.00840600  | O        | 3.93212200  | -0.11737400 | 0.90449700  |
| O         | -0.82937700 | 2.91126300  | 2.22419500  | O        | 1.49073100  | -2.91674300 | 2.28715000  |
| O         | 0.24286300  | 3.19445300  | -1.93510500 | O        | -0.04140900 | -3.44737100 | -1.68965100 |
| C         | 3.74889700  | -0.23292300 | 1.00061600  | C        | -3.85475900 | 0.12665500  | 0.87360400  |
| O         | 4.48369600  | -0.39963900 | 1.85683000  | O        | -4.66656000 | 0.24088300  | 1.69998200  |
| C         | -2.73420200 | 2.52049500  | -0.78103800 | C        | 2.91296100  | -2.21858100 | -0.98821200 |
| C         | -2.93520700 | -1.25033900 | -1.76445400 | C        | 2.88308000  | 1.41050100  | -1.76682000 |
| O         | -3.71095500 | -1.28125900 | -2.60389400 | O        | 3.69181900  | 1.53370700  | -2.60025400 |
| O         | -3.57398800 | 3.22666100  | -1.10648700 | O        | 3.82001300  | -2.77786800 | -1.46587200 |
| Sn        | 0.30079400  | -0.05207100 | -1.21526500 | Sn       | -0.30713100 | -0.05212100 | -1.09281500 |

**Table S7.** Theoretical Cartesian coordinates (in Å) for the structure **14S-2** using the M06-L/TZP and BP86/DZP methods.

| M06-L/TZP |             |             |             | BP86/DZP |             |             |             |
|-----------|-------------|-------------|-------------|----------|-------------|-------------|-------------|
| Fe        | 1.90328100  | -1.27664200 | 0.66096600  | Fe       | -1.96033700 | 1.24215500  | 0.67781800  |
| Fe        | 2.05679300  | 1.22574600  | -0.62427400 | Fe       | -1.96036800 | -1.24214500 | -0.67780800 |
| Fe        | -2.25779000 | -1.10336500 | -0.36476200 | Fe       | 2.24636200  | 1.10285900  | -0.39274100 |
| Fe        | -2.28794800 | 1.14875600  | 0.31218900  | Fe       | 2.24636000  | -1.10287200 | 0.39272800  |
| C         | -3.07938800 | 0.07949300  | -1.43787900 | C        | 3.01173200  | -0.12161400 | -1.44502100 |
| C         | -3.43081200 | -2.40043600 | -0.04798800 | C        | 3.44902800  | 2.38388200  | -0.12697900 |
| C         | -1.38897900 | -2.15432400 | -1.48458900 | C        | 1.47246400  | 2.15623300  | -1.57457200 |
| C         | -2.87157600 | -0.05472900 | 1.50193500  | C        | 3.01173400  | 0.12162700  | 1.44498300  |
| C         | -1.35613600 | 2.27450600  | 1.30569300  | C        | 1.47248600  | -2.15624100 | 1.57457600  |
| C         | -3.57106600 | 2.36725900  | 0.12414100  | C        | 3.44903700  | -2.38388800 | 0.12697700  |
| C         | 1.42311900  | 0.68861300  | -2.24132000 | C        | -1.35174200 | -0.68128000 | -2.28198600 |
| C         | 1.51015400  | 2.88914200  | -0.93640500 | C        | -1.32278300 | -2.86956400 | -0.97480500 |
| C         | 2.32392600  | 1.62182900  | 1.12134300  | C        | -2.37992000 | -1.70228300 | 1.01758600  |
| C         | 2.28071200  | -1.69968600 | -1.05790500 | C        | -2.37993700 | 1.70230200  | -1.01756200 |
| C         | 1.17675000  | -2.87961500 | 0.91617800  | C        | -1.32275400 | 2.86957900  | 0.97479600  |
| C         | 1.18328900  | -0.68769800 | 2.22306000  | C        | -1.35165900 | 0.68130900  | 2.28198300  |
| O         | 2.50822000  | 1.96945100  | 2.19588600  | O        | -2.68307200 | -2.12172500 | 2.06392700  |
| O         | 1.15903400  | 3.96063600  | -1.12117300 | O        | -0.94013000 | -3.95391700 | -1.17215000 |
| O         | 0.99420300  | 0.39255500  | -3.26057200 | O        | -0.96368100 | -0.38534000 | -3.34251700 |
| O         | 2.52465200  | -2.06535900 | -2.11451700 | O        | -2.68312200 | 2.12174600  | -2.06389300 |
| O         | 0.71200200  | -3.91311000 | 1.06417200  | O        | -0.94010300 | 3.95393400  | 1.17212900  |
| O         | 0.69801600  | -0.35965000 | 3.20693900  | O        | -0.96357400 | 0.38539100  | 3.34251100  |
| O         | -3.27807300 | -0.47475700 | 2.50307700  | O        | 3.58314700  | 0.52689600  | 2.39809800  |
| O         | -0.73738400 | 2.99474400  | 1.95786600  | O        | 0.97421400  | -2.86015800 | 2.37215000  |
| O         | -4.39681300 | 3.15840200  | 0.05725900  | O        | 4.23903300  | -3.23725100 | 0.00543300  |
| O         | -3.66843700 | 0.44127400  | -2.36915000 | O        | 3.58315800  | -0.52689700 | -2.39812100 |
| O         | -4.19200100 | -3.24282900 | 0.10626900  | O        | 4.23901900  | 3.23724800  | -0.00543000 |
| O         | -0.80101500 | -2.82515900 | -2.21305100 | O        | 0.97417400  | 2.86015400  | -2.37213100 |
| C         | 3.61881200  | -1.35139400 | 1.22175300  | C        | -3.67825900 | 1.29118900  | 1.21577500  |
| O         | 4.70070100  | -1.41156200 | 1.58188800  | O        | -4.78047900 | 1.36499100  | 1.58681100  |
| C         | 3.81344200  | 1.13855600  | -1.03521500 | C        | -3.67830400 | -1.29120600 | -1.21571600 |
| O         | 4.92313000  | 1.09337900  | -1.30014900 | O        | -4.78053100 | -1.36502900 | -1.58672800 |
| Sn        | -0.07472100 | 0.06819900  | -0.05963800 | Sn       | 0.07712800  | -0.00001100 | -0.00001700 |



**Table S8.** Theoretical Cartesian coordinates (in Å) for the structure **14S-3** using the M06-L/TZP and BP86/DZP methods.

|    | M06-L/TZP   |             |             | BP86/DZP |  |  |
|----|-------------|-------------|-------------|----------|--|--|
| Fe | -2.35599600 | -0.22664900 | -0.81042800 |          |  |  |
| Fe | 1.17437300  | 1.98739200  | 0.91772100  |          |  |  |
| C  | -4.10630200 | -0.42592200 | -1.09745600 |          |  |  |
| C  | -2.66684000 | 1.16459800  | 0.30822400  |          |  |  |
| C  | -2.26930500 | -0.96974600 | 1.95772100  |          |  |  |
| C  | 2.26930500  | 0.96974600  | 1.95772100  |          |  |  |
| C  | 0.00000000  | 2.89982000  | -0.11807600 |          |  |  |
| C  | -1.72106000 | 0.67781200  | -2.20979200 |          |  |  |
| O  | 2.87423500  | 0.40623800  | 2.75165700  |          |  |  |
| O  | -0.77260800 | 3.49918700  | -0.71229800 |          |  |  |
| O  | -1.31157600 | 1.25330100  | -3.11372900 |          |  |  |
| O  | -5.22630600 | -0.52206000 | -1.31198900 |          |  |  |
| O  | -2.89825700 | 2.06746400  | 0.97470800  |          |  |  |
| O  | -2.87423500 | -0.40623800 | 2.75165700  |          |  |  |
| C  | 0.25323000  | 2.42910600  | 2.34187100  |          |  |  |
| O  | -0.38201200 | 2.65404700  | 3.27100600  |          |  |  |
| O  | -1.99719500 | -2.82600800 | -2.13675800 |          |  |  |
| C  | -2.04291100 | -1.86542700 | -1.49866500 |          |  |  |
| Fe | -1.17437300 | -1.98739200 | 0.91772100  |          |  |  |
| C  | -0.25323000 | -2.42910600 | 2.34187100  |          |  |  |
| C  | 1.72106000  | -0.67781200 | -2.20979200 |          |  |  |
| C  | 2.66684000  | -1.16459800 | 0.30822400  |          |  |  |
| C  | 0.00000000  | -2.89982000 | -0.11807600 |          |  |  |
| O  | 0.38201200  | -2.65404700 | 3.27100600  |          |  |  |
| Fe | 2.35599600  | 0.22664900  | -0.81042800 |          |  |  |
| O  | 1.31157600  | -1.25330100 | -3.11372900 |          |  |  |
| O  | 2.89825700  | -2.06746400 | 0.97470800  |          |  |  |
| O  | 0.77260800  | -3.49918700 | -0.71229800 |          |  |  |
| C  | 2.04291100  | 1.86542700  | -1.49866500 |          |  |  |
| C  | 4.10630200  | 0.42592200  | -1.09745600 |          |  |  |
| O  | 1.99719500  | 2.82600800  | -2.13675800 |          |  |  |
| O  | 5.22630600  | 0.52206000  | -1.31198900 |          |  |  |
| Sn | 0.00000000  | 0.00000000  | 0.05306600  |          |  |  |

**Table S9.** Theoretical Cartesian coordinates (in Å) for the structure **14T-1** using the M06-L/TZP and BP86/DZP methods.

| M06-L/TZP |             |             | BP86/DZP    |    |             |             |             |
|-----------|-------------|-------------|-------------|----|-------------|-------------|-------------|
| Fe        | -2.28666400 | 1.07056600  | 0.60436300  | Fe | 2.28194600  | 1.05876700  | -0.55471900 |
| Fe        | -2.32155800 | -0.95995400 | -0.72376000 | Fe | 2.28195900  | -1.05876500 | 0.55471200  |
| C         | -3.70382100 | 1.75415600  | 1.53366200  | C  | 3.69486800  | 1.85586300  | -1.31708600 |
| C         | -2.87683700 | 1.19607400  | -1.10955800 | C  | 2.85611300  | 0.99522900  | 1.13866300  |
| C         | -1.20436300 | 2.50224600  | 0.75395700  | C  | 1.28800600  | 2.52849000  | -0.67523800 |
| C         | -1.25096400 | -2.28956100 | -1.20534100 | C  | 1.28802000  | -2.52849100 | 0.67520700  |
| C         | -2.55402600 | -1.03372800 | 1.04527900  | C  | 2.85614500  | -0.99522200 | -1.13866500 |
| C         | -3.81470200 | -1.79835100 | -1.26541600 | C  | 3.69488400  | -1.85584400 | 1.31709300  |
| O         | -0.59309800 | -3.21037900 | -1.42739900 | O  | 0.70070300  | -3.54506600 | 0.69141400  |
| O         | -2.63329200 | -1.46853600 | 2.12278300  | O  | 3.22764700  | -1.32358600 | -2.21218500 |
| O         | -4.75432200 | -2.35670900 | -1.60365100 | O  | 4.60276400  | -2.40124500 | 1.80904800  |
| O         | -4.59192300 | 2.20651600  | 2.09054700  | O  | 4.60274400  | 2.40127900  | -1.80903000 |
| O         | -3.22904700 | 1.43155600  | -2.18446800 | O  | 3.22759200  | 1.32358700  | 2.21219300  |
| O         | -0.56228400 | 3.45391300  | 0.81015200  | O  | 0.70069900  | 3.54507000  | -0.69146100 |
| O         | 0.46584300  | 0.73287700  | 3.17895600  | O  | -1.07696900 | 1.50130400  | -3.13550600 |
| C         | 1.00314600  | 0.12617600  | 2.36839700  | C  | -1.39708200 | 0.69151700  | -2.35833100 |
| Fe        | 1.83003200  | -0.92927600 | 1.14500800  | Fe | -1.94590100 | -0.64373800 | -1.26955500 |
| C         | 2.30222400  | 1.81913100  | 0.51448200  | C  | -2.44348200 | 1.88290600  | 0.05041600  |
| C         | 0.99786800  | -2.36212700 | 1.78620200  | C  | -1.16248300 | -1.87809300 | -2.27160600 |
| C         | 1.44680100  | 2.30986500  | -1.86451500 | C  | -1.16247900 | 1.87807300  | 2.27163500  |
| C         | 3.47457800  | -0.82684200 | 1.87828500  | C  | -3.63422300 | -0.50693100 | -1.86596600 |
| O         | 2.47368800  | 2.52255200  | 1.40260500  | O  | -2.80620100 | 2.78922800  | -0.59234200 |
| Fe        | 2.07828900  | 0.87938600  | -1.01773400 | Fe | -1.94588900 | 0.64373000  | 1.26956400  |
| O         | 0.47452000  | -3.29973800 | 2.17927000  | O  | -0.68264000 | -2.70163000 | -2.94625000 |
| O         | 1.04126000  | 3.23655000  | -2.39821500 | O  | -0.68264300 | 2.70160200  | 2.94629200  |
| O         | 4.50701900  | -0.77893600 | 2.36557500  | O  | -4.71457600 | -0.44600800 | -2.30091600 |
| C         | 2.38322900  | -1.89885900 | -0.28066300 | C  | -2.44351500 | -1.88290100 | -0.05040200 |
| C         | 1.58899700  | -0.22111300 | -2.37982300 | C  | -1.39705300 | -0.69153300 | 2.35832200  |
| C         | 3.84786300  | 0.76656500  | -1.33475100 | C  | -3.63421400 | 0.50694300  | 1.86597300  |
| O         | 2.73867600  | -2.62061700 | -1.09614900 | O  | -2.80623500 | -2.78922000 | 0.59235900  |
| O         | 1.28193400  | -0.87047400 | -3.27030300 | O  | -1.07692200 | -1.50132600 | 3.13548300  |
| O         | 4.96768400  | 0.70706000  | -1.55291300 | O  | -4.71456700 | 0.44604000  | 2.30092400  |
| Sn        | -0.08671700 | 0.01348700  | -0.15560600 | Sn | 0.08185600  | -0.00000200 | -0.00000600 |

**Table S10.** Theoretical Cartesian coordinates (in Å) for the structure **14T-2** using the M06-L/TZP and BP86/DZP methods.

| M06-L/TZP |             |             |             | BP86/DZP |             |             |             |
|-----------|-------------|-------------|-------------|----------|-------------|-------------|-------------|
| Fe        | 2.36607600  | -1.00838000 | -0.43751900 | Fe       | 2.39993000  | -1.05254300 | -0.35084000 |
| Fe        | 1.33717900  | 1.32745500  | 0.60978700  | Fe       | 1.34169100  | 1.41123100  | 0.47058200  |
| Fe        | -1.28650400 | 1.21081100  | -0.84841600 | Fe       | -1.53048900 | 1.28208400  | -0.44192700 |
| Fe        | -2.43564500 | -0.92829400 | 0.47302800  | Fe       | -2.27000100 | -1.21309600 | 0.21703000  |
| C         | -0.43053400 | 2.62980500  | -1.52535500 | C        | -2.29813500 | 2.86689100  | -0.65360800 |
| C         | -0.95749900 | 0.02347300  | -2.16401000 | C        | -0.70240400 | 1.51539000  | -2.02602300 |
| C         | -2.43123300 | -2.43043400 | -0.54159200 | C        | -2.37446600 | -2.54700600 | -0.96837700 |
| C         | -2.42012000 | -1.58893900 | 2.14174000  | C        | -1.62586100 | -2.15759600 | 1.58772800  |
| C         | -1.74212500 | 1.68678100  | 0.84387900  | C        | -1.91879700 | 1.37985500  | 1.32476600  |
| C         | 1.01280200  | 3.06377700  | 0.91137800  | C        | 0.78752600  | 3.08581100  | 0.25306200  |
| C         | 0.76004900  | 0.78002100  | 2.24397900  | C        | 1.05122500  | 1.31076000  | 2.22657400  |
| C         | 3.08503000  | 1.38942100  | 0.98552400  | C        | 3.06678300  | 1.80881200  | 0.60278500  |
| C         | 2.09996500  | 0.22242700  | -1.73121700 | C        | 2.50068400  | 0.03800800  | -1.78496400 |
| C         | 1.87770400  | -2.48037300 | -1.32815900 | C        | 2.12649400  | -2.63042400 | -1.13686600 |
| C         | 2.46330100  | -1.65194000 | 1.25608700  | C        | 2.28121800  | -1.51842500 | 1.38445700  |
| O         | 4.17803900  | 1.51221000  | 1.31130900  | O        | 4.18184000  | 2.13495100  | 0.74734800  |
| O         | 0.45589500  | 0.52369000  | 3.32029700  | O        | 0.91937900  | 1.31814800  | 3.39028900  |
| O         | 0.81625200  | 4.15987500  | 1.17062200  | O        | 0.55235900  | 4.23221300  | 0.18781800  |
| O         | 1.99602500  | 0.96684900  | -2.59941600 | O        | 2.65426200  | 0.68495300  | -2.74681500 |
| O         | 1.57487900  | -3.41249700 | -1.91785900 | O        | 1.98143800  | -3.66996100 | -1.64758100 |
| O         | 2.50679800  | -2.03672600 | 2.33299200  | O        | 2.24008500  | -1.84245200 | 2.50570600  |
| O         | -2.41408200 | -3.38507800 | -1.17642500 | O        | -2.47212800 | -3.44403700 | -1.71184100 |
| O         | -2.41643400 | -2.02614400 | 3.20054900  | O        | -1.28114800 | -2.83656000 | 2.47904200  |
| O         | -2.04609300 | 2.05025800  | 1.89197800  | O        | -2.19585800 | 1.54171900  | 2.44825600  |
| O         | 0.05063400  | 3.53978500  | -2.02858300 | O        | -2.81888900 | 3.89885100  | -0.81228300 |
| O         | -0.78651600 | -0.72332900 | -3.02336600 | O        | -0.22970800 | 1.73583100  | -3.07240700 |
| C         | 4.14346100  | -0.97741000 | -0.66022900 | C        | 4.18638100  | -1.06489300 | -0.24715100 |
| O         | 5.27511200  | -0.98962000 | -0.81424800 | O        | 5.34945700  | -1.11917200 | -0.19607100 |
| C         | -2.91586600 | 1.58068500  | -1.47523900 | C        | -2.99683400 | 0.31637700  | -1.07690800 |
| C         | -4.17696800 | -0.54156700 | 0.34436700  | C        | -3.97172100 | -1.28276900 | 0.78723000  |
| O         | -5.30296600 | -0.34383300 | 0.27033300  | O        | -5.06676100 | -1.39973800 | 1.17349500  |
| O         | -3.94882000 | 1.84547000  | -1.88805700 | O        | -3.91401700 | 0.32419400  | -1.82789700 |
| Sn        | -0.02452700 | -0.78646100 | 0.18146400  | Sn       | 0.03311100  | -0.60631600 | -0.12477300 |

**Table S11.** Theoretical Cartesian coordinates (in Å) for the structure **13S-1** using the M06-L/TZP and BP86/DZP methods.

| M06-L/TZP |             |             |             | BP86/DZP |             |             |             |
|-----------|-------------|-------------|-------------|----------|-------------|-------------|-------------|
| Fe        | -0.66532700 | -0.00934300 | 1.30189900  | Fe       | 0.69989700  | -0.00000100 | 1.29420700  |
| Fe        | 0.34724200  | 2.14684200  | 0.00000000  | Fe       | -0.45381800 | -2.15164300 | 0.00000000  |
| Fe        | -0.66532700 | -0.00934300 | -1.30189900 | Fe       | 0.69989700  | -0.00000100 | -1.29420700 |
| Fe        | 0.40482200  | -2.12703700 | 0.00000000  | Fe       | -0.45382800 | 2.15163700  | 0.00000000  |
| C         | 1.28657600  | -2.88114800 | 1.34217800  | C        | -1.34434900 | 2.94838100  | 1.29640900  |
| O         | 1.84437300  | -3.35504400 | 2.22224000  | O        | -1.92950000 | 3.49838400  | 2.14672100  |
| C         | 1.28657600  | -2.88114800 | -1.34217800 | C        | -1.34434900 | 2.94838100  | -1.29640900 |
| O         | 1.84437300  | -3.35504400 | -2.22224000 | O        | -1.92950000 | 3.49838400  | -2.14672100 |
| C         | -1.00868400 | -3.21189400 | 0.00000000  | C        | 0.94260000  | 3.26249200  | 0.00000000  |
| O         | -1.89545400 | -3.93498700 | 0.00000000  | O        | 1.80327100  | 4.05192900  | 0.00000000  |
| C         | 1.22198900  | 2.92758100  | -1.32982300 | C        | -1.34434900 | -2.94838300 | -1.29640400 |
| O         | 1.77697100  | 3.42425900  | -2.19885800 | O        | -1.92951300 | -3.49837900 | -2.14671100 |
| C         | -1.07141600 | 3.22539200  | 0.00000000  | C        | 0.94261200  | -3.26249500 | 0.00000000  |
| O         | -1.94640500 | 3.96229700  | 0.00000000  | O        | 1.80328600  | -4.05192900 | 0.00000000  |
| C         | 1.22198900  | 2.92758100  | 1.32982300  | C        | -1.34434900 | -2.94838300 | 1.29640400  |
| O         | 1.77697100  | 3.42425900  | 2.19885800  | O        | -1.92951300 | -3.49837900 | 2.14671100  |
| C         | -1.42051500 | -1.36910100 | -2.17722700 | C        | 1.53506400  | 1.34160800  | -2.11953400 |
| O         | -1.92596000 | -2.17851700 | -2.81078100 | O        | 2.11172600  | 2.13296600  | -2.75678200 |
| C         | 0.69769700  | 0.07273000  | -2.45562500 | C        | -0.62068100 | 0.00000000  | -2.48603300 |
| O         | 1.47735700  | 0.11069300  | -3.30004200 | O        | -1.38332200 | 0.00000200  | -3.37558600 |
| C         | -1.57226100 | 1.31577900  | -2.08231600 | C        | 1.53507900  | -1.34159300 | -2.11954500 |
| O         | -2.17594700 | 2.09811800  | -2.66201600 | O        | 2.11174400  | -2.13295600 | -2.75678500 |
| C         | -1.57226100 | 1.31577900  | 2.08231600  | C        | 1.53507900  | -1.34159300 | 2.11954500  |
| O         | -2.17594700 | 2.09811800  | 2.66201600  | O        | 2.11174400  | -2.13295600 | 2.75678500  |
| C         | 0.69769700  | 0.07273000  | 2.45562500  | C        | -0.62068100 | 0.00000000  | 2.48603300  |
| O         | 1.47735700  | 0.11069300  | 3.30004200  | O        | -1.38332200 | 0.00000200  | 3.37558600  |
| C         | -1.42051500 | -1.36910100 | 2.17722700  | C        | 1.53506400  | 1.34160800  | 2.11953400  |
| O         | -1.92596000 | -2.17851700 | 2.81078100  | O        | 2.11172600  | 2.13296600  | 2.75678200  |
| C         | -2.16983400 | -0.18954500 | 0.00000000  | C        | 2.20123100  | -0.00000100 | 0.00000000  |
| O         | -3.31946000 | -0.34179000 | 0.00000000  | O        | 3.38472100  | 0.00001600  | 0.00000000  |
| Sn        | 1.58645900  | 0.02321600  | 0.00000000  | Sn       | -1.48144100 | -0.00000600 | 0.00000000  |

**Table S12.** Theoretical Cartesian coordinates (in Å) for the structure **13T-1** using the M06-L/TZP and BP86/DZP methods.

| M06-L/TZP                              | BP86/DZP                               |
|----------------------------------------|----------------------------------------|
| Fe -0.02031200 -1.21071600 0.83690200  | Fe 0.00000700 -1.26751100 0.81848300   |
| Fe 2.15072200 -0.12179000 -0.52149500  | Fe 2.23001300 -0.00000700 -0.54738000  |
| Fe 0.17607500 1.33765900 0.67287100    | Fe 0.00010600 1.26754000 0.81844500    |
| Fe -2.29893200 -0.08436000 -0.40560200 | Fe -2.23007600 -0.00002500 -0.54730600 |
| C -3.28377200 -1.20425800 -1.43982300  | C -2.96467700 -1.31797500 -1.47846000  |
| O -3.92572600 -1.87195800 -2.11029400  | O -3.49055600 -2.15767900 -2.10149800  |
| C -2.69737300 1.52235100 -1.13642900   | C -2.96451000 1.31818600 -1.47821800   |
| O -2.97610000 2.52989000 -1.60579500   | O -3.49028200 2.15807100 -2.10110300   |
| C -3.41565000 0.07324300 0.97346800    | C -3.41861700 -0.00005600 0.78220200   |
| O -4.15264700 0.20548600 1.84028800    | O -4.24209200 -0.00006200 1.61198000   |
| C 3.01244500 1.01228400 -1.58950800    | C 2.96463100 1.31790700 -1.47856200    |
| O 3.56442500 1.74093700 -2.27879600    | O 3.49050900 2.15760100 -2.10161300    |
| C 3.28295100 -0.06221400 0.85187800    | C 3.41851200 0.00006200 0.78216300     |
| O 4.03389400 -0.03821100 1.71645900    | O 4.24196000 0.00009700 1.61197000     |
| C 2.70799800 -1.63677900 -1.27161000   | C 2.96448000 -1.31820500 -1.47827600   |
| O 3.06108100 -2.62068200 -1.74033300   | O 3.49026200 -2.15809300 -2.10114700   |
| C -1.14211600 2.26534700 1.44370800    | C -1.32167500 2.13250600 1.64227300    |
| O -1.95575200 2.89057600 1.94842900    | O -2.13411400 2.74778300 2.20952000    |
| C 0.24002600 2.36512000 -0.82098800    | C 0.00018800 2.41977800 -0.56992600    |
| O 0.32280400 3.17424300 -1.63373000    | O 0.00018400 3.32876200 -1.30987800    |
| C 1.53909300 2.23134400 1.39819300     | C 1.32175900 2.13253700 1.64244600     |
| O 2.37752600 2.83974900 1.88204600     | O 2.13413400 2.74781100 2.20978500     |
| C 1.32680400 -2.13639700 1.56471200    | C 1.32173200 -2.13252300 1.64235300    |
| O 2.14237200 -2.76737000 2.05919900    | O 2.13414700 -2.74781500 2.20961500    |
| C -0.27219700 -2.44174600 -0.46557700  | C -0.00009000 -2.41977500 -0.56986600  |
| O -0.42162200 -3.35436300 -1.14888500  | O -0.00012200 -3.32877300 -1.30980200  |
| C -1.29877500 -1.87199100 1.89390200   | C -1.32170200 -2.13243700 1.64246700   |
| O -2.07439500 -2.33492600 2.59545700   | O -2.13410000 -2.74768600 2.20980300   |
| C 0.22661400 0.18293700 2.24843200     | C 0.00007700 0.00003600 2.31407800     |
| O 0.35605400 0.22640500 3.40368900     | O 0.00009400 0.00005100 3.50170200     |
| Sn -0.08736000 -0.09388500 -1.52947200 | Sn -0.00004300 -0.00001500 -1.41562000 |

**Table S13.** Theoretical Cartesian coordinates (in Å) for the structure **12S-1** using the M06-L/TZP and BP86/DZP methods.

| M06-L/TZP |             |             |             | BP86/DZP |             |             |             |
|-----------|-------------|-------------|-------------|----------|-------------|-------------|-------------|
| Fe        | -2.10441000 | -0.30640000 | 0.33420900  | Fe       | 0.00000000  | 2.13386100  | 0.35084500  |
| Fe        | 2.10441000  | 0.30640000  | 0.33420900  | Fe       | 0.00000000  | -2.13386100 | 0.35084500  |
| Fe        | 0.25219700  | -1.35230700 | -0.53901500 | Fe       | -1.39781900 | -0.07408700 | -0.54677300 |
| Fe        | -0.25219700 | 1.35230700  | -0.53901500 | Fe       | 1.39781900  | 0.07408700  | -0.54677300 |
| C         | 1.83866900  | -1.44499900 | -1.34860100 | C        | -1.68332800 | -1.59825500 | -1.41430100 |
| C         | 0.10372700  | -3.10813800 | -0.36890000 | C        | -3.11895100 | 0.20026900  | -0.27110000 |
| C         | -0.83274900 | -1.30731900 | -1.92631800 | C        | -1.33278500 | 1.09371900  | -1.86331000 |
| C         | -1.83866900 | 1.44499900  | -1.34860100 | C        | 1.68332800  | 1.59825500  | -1.41430100 |
| C         | 0.83274900  | 1.30731900  | -1.92631800 | C        | 1.33278500  | -1.09371900 | -1.86331000 |
| C         | -0.10372700 | 3.10813800  | -0.36890000 | C        | 3.11895100  | -0.20026900 | -0.27110000 |
| C         | 3.11622000  | -0.78002900 | 1.30918400  | C        | -1.26878400 | -2.90065800 | 1.31500600  |
| C         | 3.42641100  | 0.77764000  | -0.76161300 | C        | 0.18713900  | -3.54085100 | -0.72827100 |
| C         | 2.14227600  | 1.79473500  | 1.29754400  | C        | 1.43600800  | -2.55484700 | 1.29222500  |
| C         | -2.14227600 | -1.79473500 | 1.29754400  | C        | -1.43600800 | 2.55484700  | 1.29222500  |
| C         | -3.42641100 | -0.77764000 | -0.76161300 | C        | -0.18713900 | 3.54085100  | -0.72827100 |
| C         | -3.11622000 | 0.78002900  | 1.30918400  | C        | 1.26878400  | 2.90065800  | 1.31500600  |
| O         | 2.26044100  | 2.75139400  | 1.92123600  | O        | 2.35989400  | -2.90001600 | 1.92174300  |
| O         | 4.30085300  | 1.08642700  | -1.42828500 | O        | 0.32004100  | -4.50686500 | -1.36698100 |
| O         | 3.77254800  | -1.45993200 | 1.95389500  | O        | -2.08213100 | -3.42792200 | 1.96808300  |
| O         | -2.26044100 | -2.75139400 | 1.92123600  | O        | -2.35989400 | 2.90001600  | 1.92174300  |
| O         | -4.30085300 | -1.08642700 | -1.42828500 | O        | -0.32004100 | 4.50686500  | -1.36698100 |
| O         | -3.77254800 | 1.45993200  | 1.95389500  | O        | 2.08213100  | 3.42792200  | 1.96808300  |
| O         | -2.67574500 | 1.73661600  | -2.09016700 | O        | 2.09544400  | 2.38239400  | -2.19135500 |
| O         | 1.39186800  | 1.31603000  | -2.93226100 | O        | 1.39259800  | -1.70756400 | -2.86213300 |
| O         | 0.00000000  | 4.23986400  | -0.23133000 | O        | 4.25708600  | -0.37528300 | -0.06591000 |
| O         | 2.67574500  | -1.73661600 | -2.09016700 | O        | -2.09544400 | -2.38239400 | -2.19135500 |
| O         | 0.00000000  | -4.23986400 | -0.23133000 | O        | -4.25708600 | 0.37528300  | -0.06591000 |
| O         | -1.39186800 | -1.31603000 | -2.93226100 | O        | -1.39259800 | 1.70756400  | -2.86213300 |
| Sn        | 0.00000000  | 0.00000000  | 1.54290000  | Sn       | 0.00000000  | 0.00000000  | 1.43540300  |

**Table S14.** Theoretical Cartesian coordinates (in Å) for the structure **12S-2** using the M06-L/TZP and BP86/DZP methods.

|    | M06-L/TZP   |             |             | BP86/DZP |  |  |
|----|-------------|-------------|-------------|----------|--|--|
| Fe | -0.28505100 | 1.29931500  | 0.63546000  |          |  |  |
| Fe | -2.11420500 | -0.20400400 | -0.51205400 |          |  |  |
| Fe | 2.14795900  | -0.05466800 | -0.40791800 |          |  |  |
| Fe | 0.19713800  | -1.16386200 | 0.84915900  |          |  |  |
| C  | 3.24919000  | -1.11204400 | -1.30761000 |          |  |  |
| C  | 2.20244300  | 1.30729500  | -1.56837700 |          |  |  |
| C  | 3.37984400  | 0.50136000  | 0.76552700  |          |  |  |
| C  | 1.88652300  | -1.68001000 | 1.17904200  |          |  |  |
| C  | -0.69383800 | -2.62211800 | 1.32237800  |          |  |  |
| C  | -0.00613000 | -0.49253200 | 2.46286400  |          |  |  |
| C  | -3.54341100 | 0.53056700  | -1.29045000 |          |  |  |
| C  | -2.48247400 | -1.88998500 | -0.95111300 |          |  |  |
| C  | -2.70115800 | -0.18589700 | 1.15245400  |          |  |  |
| C  | -1.16027100 | 1.91771800  | -0.78794000 |          |  |  |
| C  | 1.07176700  | 2.39147900  | 0.89592700  |          |  |  |
| C  | -1.25933100 | 2.33329600  | 1.69633400  |          |  |  |
| O  | -3.13204600 | -0.21125800 | 2.21786200  |          |  |  |
| O  | -2.74614400 | -2.96572500 | -1.24452300 |          |  |  |
| O  | -4.47060600 | 0.97908900  | -1.78548400 |          |  |  |
| O  | -1.46153000 | 2.71206500  | -1.58388800 |          |  |  |
| O  | 1.86611900  | 3.21204400  | 1.03424700  |          |  |  |
| O  | -1.87275200 | 2.99482300  | 2.39784300  |          |  |  |
| O  | 2.73899900  | -2.28065800 | 1.68767700  |          |  |  |
| O  | -1.26560500 | -3.56485200 | 1.63456500  |          |  |  |
| O  | -0.09506600 | -0.08035300 | 3.53345700  |          |  |  |
| O  | 3.95317000  | -1.79972300 | -1.88834800 |          |  |  |
| O  | 2.31700600  | 2.19892600  | -2.27944600 |          |  |  |
| O  | 4.18957900  | 0.87283100  | 1.47995800  |          |  |  |
| Sn | 0.03160400  | -0.38657500 | -1.55452800 |          |  |  |

**Table S15.** Theoretical Cartesian coordinates (in Å) for the structure **12T-1** using the M06-L/TZP and BP86/DZP methods.

| M06-L/TZP |             |             | BP86/DZP    |    |             |             |             |
|-----------|-------------|-------------|-------------|----|-------------|-------------|-------------|
| Fe        | -2.01710100 | 0.26850600  | -0.19661400 | Fe | -2.01981800 | 0.20892200  | -0.17970600 |
| Fe        | 2.08005800  | 0.09978900  | -0.06145200 | Fe | 2.07521100  | 0.08249800  | -0.01013900 |
| Fe        | 0.03759700  | 1.34036900  | 0.40679900  | Fe | 0.04270600  | 1.33597600  | 0.36534700  |
| Fe        | -0.04938400 | -1.23574400 | 0.88486500  | Fe | -0.00706200 | -1.24411700 | 0.81491600  |
| C         | 1.26352800  | 1.28783200  | 1.70457900  | C  | 1.17953400  | 1.30454700  | 1.74548300  |
| C         | -0.02435700 | 3.11733200  | 0.33288100  | C  | -0.06488200 | 3.11346800  | 0.29650400  |
| C         | -1.30980800 | 1.13338400  | 1.61922300  | C  | -1.37228700 | 1.19226600  | 1.55064400  |
| C         | -1.50068200 | -1.75081200 | 1.82284700  | C  | -1.33096500 | -1.73797800 | 1.91837500  |
| C         | 1.31061700  | -1.68917500 | 1.96613000  | C  | 1.42314700  | -1.70196100 | 1.77689400  |
| C         | 0.04733000  | -2.75947000 | -0.06520100 | C  | 0.00355100  | -2.79272000 | -0.03967700 |
| C         | 1.74950800  | 1.43054500  | -1.26602100 | C  | 1.58774600  | 1.49382700  | -1.08922200 |
| C         | 3.74116100  | 0.67834000  | 0.35658000  | C  | 3.69454000  | 0.76191600  | 0.29443600  |
| C         | 2.70122700  | -1.29290500 | -0.98462800 | C  | 2.85732400  | -1.19660800 | -0.93584000 |
| C         | -1.84058600 | 1.52224200  | -1.44744400 | C  | -2.05076200 | 1.42420400  | -1.46549500 |
| C         | -3.64276300 | 0.62292800  | 0.44403200  | C  | -3.65567100 | 0.48315200  | 0.48445300  |
| C         | -2.67598300 | -1.17147500 | -0.99990200 | C  | -2.66121400 | -1.24355500 | -0.96367900 |
| O         | 3.13271400  | -2.17847400 | -1.56961400 | O  | 3.39395200  | -2.01656700 | -1.57691600 |
| O         | 4.79583900  | 1.03826900  | 0.59928500  | O  | 4.76643700  | 1.18625200  | 0.47596300  |
| O         | 1.83644000  | 2.25143700  | -2.07495200 | O  | 1.83830900  | 2.27672400  | -1.94858200 |
| O         | -1.86471600 | 2.31212100  | -2.28631800 | O  | -2.20827600 | 2.20320600  | -2.32792800 |
| O         | -4.69219200 | 0.86105200  | 0.83108200  | O  | -4.74131900 | 0.67326500  | 0.86645500  |
| O         | -3.11260100 | -2.10661300 | -1.50312300 | O  | -3.13253400 | -2.18386400 | -1.47832000 |
| O         | -2.38362800 | -2.14200500 | 2.43849800  | O  | -2.13192200 | -2.14628800 | 2.66574200  |
| O         | 2.15551700  | -2.03061900 | 2.66336900  | O  | 2.28878700  | -2.10190300 | 2.46057300  |
| O         | 0.11342300  | -3.79249700 | -0.56390600 | O  | 0.01929300  | -3.86094200 | -0.52238400 |
| O         | 1.81155600  | 1.39391700  | 2.71857800  | O  | 1.70996900  | 1.43583600  | 2.78840300  |
| O         | -0.06254200 | 4.26004400  | 0.29082000  | O  | -0.12491100 | 4.27889500  | 0.28530700  |
| O         | -1.77738900 | 1.28857500  | 2.67088600  | O  | -1.84945900 | 1.44908700  | 2.60383700  |
| Sn        | 0.00270100  | -0.56620400 | -1.62977700 | Sn | 0.02692200  | -0.52236400 | -1.63050600 |



**Table S16.** Theoretical harmonic vibrational frequencies (in  $\text{cm}^{-1}$ ) for the structure **16S-1** using the M06-L/TZP and BP86/DZP methods

| M06-L/TZP                                                                                                                                                                                                                                                                                                                                                                                                                                                                                                                                                                                                                                                                                                                                                                                                                                                                                                                                                                                                                                                                                                                                                                                                                                                                                                                                                                                                                                                                                                                                                                                                                                                                                                                                                          | BP86/DZP                                                                                                                                                                                                                                                                                                                                                                                                                                                                                                                                                                                                                                                                                                                                                                                                                                                                                                                                                                                                                                                                                                                                                                                                                                                                                                                                                                                                                                                                                                                                                                                                                                                                                                                                                                                                                       |
|--------------------------------------------------------------------------------------------------------------------------------------------------------------------------------------------------------------------------------------------------------------------------------------------------------------------------------------------------------------------------------------------------------------------------------------------------------------------------------------------------------------------------------------------------------------------------------------------------------------------------------------------------------------------------------------------------------------------------------------------------------------------------------------------------------------------------------------------------------------------------------------------------------------------------------------------------------------------------------------------------------------------------------------------------------------------------------------------------------------------------------------------------------------------------------------------------------------------------------------------------------------------------------------------------------------------------------------------------------------------------------------------------------------------------------------------------------------------------------------------------------------------------------------------------------------------------------------------------------------------------------------------------------------------------------------------------------------------------------------------------------------------|--------------------------------------------------------------------------------------------------------------------------------------------------------------------------------------------------------------------------------------------------------------------------------------------------------------------------------------------------------------------------------------------------------------------------------------------------------------------------------------------------------------------------------------------------------------------------------------------------------------------------------------------------------------------------------------------------------------------------------------------------------------------------------------------------------------------------------------------------------------------------------------------------------------------------------------------------------------------------------------------------------------------------------------------------------------------------------------------------------------------------------------------------------------------------------------------------------------------------------------------------------------------------------------------------------------------------------------------------------------------------------------------------------------------------------------------------------------------------------------------------------------------------------------------------------------------------------------------------------------------------------------------------------------------------------------------------------------------------------------------------------------------------------------------------------------------------------|
| 17.6 (A2, 0.0), 19.2 (B1, 0.0), 36.2 (E, 0.2), 36.2 (E, 0.2), 43.9 (B1, 0.0), 47.8 (A1, 0.0), 49.9 (E, 0.1), 49.9 (E, 0.1), 64.7 (B2, 0.1), 73.6 (E, 0.2), 73.6 (E, 0.2), 75.6 (B1, 0.0), 79.3 (A2, 0.0), 80.3 (E, 0.1), 80.3 (E, 0.1), 81.6 (A1, 0.0), 88.2 (B2, 0.1), 92.0 (A2, 0.0), 93.3 (E, 0.0), 93.3 (E, 0.0), 94.0 (A1, 0.0), 96.6 (B1, 0.0), 99.2 (E, 0.3), 99.2 (E, 0.3), 105.6 (B1, 0.0), 107.0 (E, 0.6), 107.0 (E, 0.6), 111.8 (A2, 0.0), 112.0 (B2, 0.1), 125.2 (E, 0.4), 125.2 (E, 0.4), 140.2 (A1, 0.0), 150.2 (B2, 1.4), 160.7 (A1, 0.0), 161.5 (E, 0.0), 161.5 (E, 0.0), 167.7 (B2, 0.3), 198.1 (A1, 0.0), 203.2 (E, 2.3), 203.2 (E, 2.3), 281.3 (B2, 15.5), 407.9 (A2, 0.0), 410.2 (E, 4.1), 410.2 (E, 4.1), 411.5 (B1, 0.0), 411.9 (E, 0.3), 411.9 (E, 0.3), 414.4 (B2, 2.3), 416.0 (A1, 0.0), 428.8 (B1, 0.0), 429.4 (A2, 0.0), 436.1 (E, 10.8), 436.1 (E, 10.8), 444.7 (B2, 10.6), 446.2 (A1, 0.0), 450.0 (E, 0.1), 450.0 (E, 0.1), 477.5 (E, 0.6), 477.5 (E, 0.6), 482.8 (B2, 0.0), 485.0 (A1, 0.0), 487.2 (E, 0.2), 487.2 (E, 0.2), 499.0 (B2, 13.2), 502.2 (A1, 0.0), 507.5 (A1, 0.0), 508.7 (E, 8.8), 508.7 (E, 8.8), 510.5 (B2, 4.2), 512.1 (A2, 0.0), 513.8 (B1, 0.0), 519.5 (E, 2.7), 519.5 (E, 2.7), 564.6 (A2, 0.0), 565.0 (B1, 0.0), 578.1 (E, 30.3), 578.1 (E, 30.3), 614.7 (E, 22.9), 614.7 (E, 22.9), 616.0 (A2, 0.0), 622.9 (B1, 0.0), 624.6 (E, 30.8), 624.6 (E, 30.8), 629.3 (B2, 661.3), 637.3 (A1, 0.0), 644.8 (E, 347.0), 644.8 (E, 347.0), 658.3 (B2, 11.3), 662.5 (A1, 0.0), 2029 (A2, 0), 2042 (B1, 0), 2057 (E, 1), 2057 (E, 1), 2061 (E, 260), 2061 (E, 260), 2070 (A1, 0), 2073 (E, 362), 2073 (E, 362), 2084 (B2, 1229), 2092 (B2, 28), 2097 (A1, 0), 2113 (E, 2477), 2113 (E, 2477), 2133 (B2, 1905), 2166 (A1, 0) | -13.2 (B1, 0.0), -12.7 (A2, 0.0), 21.9 (E, 0.1), 21.9 (E, 0.1), 31.4 (B1, 0.0), 42.1 (A1, 0.0), 46.1 (E, 0.1), 46.1 (E, 0.1), 54.4 (B2, 0.2), 66.6 (E, 0.2), 66.6 (E, 0.2), 68.6 (B1, 0.0), 69.2 (A2, 0.0), 71.3 (E, 0.0), 71.3 (E, 0.0), 76.9 (A1, 0.0), 84.6 (B2, 0.2), 87.2 (A1, 0.0), 87.3 (E, 0.0), 87.3 (E, 0.0), 88.0 (A2, 0.0), 91.5 (B1, 0.0), 97.3 (E, 0.1), 97.3 (E, 0.1), 101.3 (B2, 0.1), 101.5 (E, 0.6), 101.5 (E, 0.6), 106.2 (B1, 0.0), 106.5 (A2, 0.0), 126.2 (E, 0.8), 126.2 (E, 0.8), 127.2 (A1, 0.0), 127.8 (B2, 1.9), 136.3 (E, 0.1), 136.3 (E, 0.1), 141.2 (A1, 0.0), 152.5 (B2, 1.2), 182.5 (E, 4.6), 182.5 (E, 4.6), 186.7 (A1, 0.0), 250.4 (B2, 27.0), 391.7 (E, 3.4), 391.7 (E, 3.4), 392.8 (A1, 0.0), 393.3 (B2, 0.0), 394.6 (A2, 0.0), 396.0 (B1, 0.0), 397.3 (E, 0.6), 397.3 (E, 0.6), 417.9 (A2, 0.0), 419.5 (B1, 0.0), 432.1 (E, 0.0), 432.1 (E, 0.0), 447.3 (E, 8.5), 447.3 (E, 8.5), 454.0 (B2, 7.2), 454.8 (A1, 0.0), 468.0 (E, 3.2), 468.0 (E, 3.2), 471.9 (B2, 0.3), 473.8 (A1, 0.0), 491.8 (A1, 0.0), 494.8 (E, 1.9), 494.8 (E, 1.9), 494.8 (B2, 1.2), 504.5 (E, 0.6), 504.5 (E, 0.6), 509.2 (B2, 7.2), 510.2 (A1, 0.0), 525.1 (A2, 0.0), 525.7 (B1, 0.0), 528.6 (E, 0.5), 528.6 (E, 0.5), 553.7 (A2, 0.0), 555.6 (B1, 0.0), 563.2 (E, 13.2), 563.2 (E, 13.2), 606.7 (A2, 0.0), 608.7 (E, 78.9), 608.7 (E, 78.9), 613.6 (B1, 0.0), 622.2 (E, 0.1), 622.2 (E, 0.1), 625.8 (B2, 583.7), 635.9 (A1, 0.0), 640.7 (E, 307.1), 640.7 (E, 307.1), 645.5 (B2, 3.8), 648.1 (A1, 0.0), 1960.1 (A2, 0.0), 1968.7 (B1, 0.0), 1979.4 (E, 47.6), 1979.4 (E, 47.6), 1988.9 (E, 34.4), 1988.9 (E, 34.4), 1989.2 (A1, 0.0), 1996.5 (E, 716.4), 1996.5 (E, 716.4), 1999.8 (B2, 1044.2), 2014.1 (A1, 0.0), 2014.9 (B2, 483.2), 2033.4 (E, 2182.5), 2033.4 (E, 2182.5), 2053.2 (B2, 1474.2), 2084.0 (A1, 0.0) |

**Table S17.** Theoretical harmonic vibrational frequencies (in  $\text{cm}^{-1}$ ) for the structure **16S-2** using the M06-L/TZP and BP86/DZP methods

| M06-L/TZP                                                                                                                                                                                                                                                                                                                                                                                                                                                                                                                                                                                                                                                                                                                                                                                                                                                                                                                                                                                                                                                                                                                                                                                                                                                                                                                                                                                                                                                                                                                                                                                                                                                                                                                                                                                                                       | BP86/DZP                                                                                                                                                                                                                                                                                                                                                                                                                                                                                                                                                                                                                                                                                                                                                                                                                                                                                                                                                                                                                                                                                                                                                                                                                                                                                                                                                                                                                                                                                                                                                                                                                                                                                                                                                                                                                                                                                     |
|---------------------------------------------------------------------------------------------------------------------------------------------------------------------------------------------------------------------------------------------------------------------------------------------------------------------------------------------------------------------------------------------------------------------------------------------------------------------------------------------------------------------------------------------------------------------------------------------------------------------------------------------------------------------------------------------------------------------------------------------------------------------------------------------------------------------------------------------------------------------------------------------------------------------------------------------------------------------------------------------------------------------------------------------------------------------------------------------------------------------------------------------------------------------------------------------------------------------------------------------------------------------------------------------------------------------------------------------------------------------------------------------------------------------------------------------------------------------------------------------------------------------------------------------------------------------------------------------------------------------------------------------------------------------------------------------------------------------------------------------------------------------------------------------------------------------------------|----------------------------------------------------------------------------------------------------------------------------------------------------------------------------------------------------------------------------------------------------------------------------------------------------------------------------------------------------------------------------------------------------------------------------------------------------------------------------------------------------------------------------------------------------------------------------------------------------------------------------------------------------------------------------------------------------------------------------------------------------------------------------------------------------------------------------------------------------------------------------------------------------------------------------------------------------------------------------------------------------------------------------------------------------------------------------------------------------------------------------------------------------------------------------------------------------------------------------------------------------------------------------------------------------------------------------------------------------------------------------------------------------------------------------------------------------------------------------------------------------------------------------------------------------------------------------------------------------------------------------------------------------------------------------------------------------------------------------------------------------------------------------------------------------------------------------------------------------------------------------------------------|
| -40.9 (A2, 0.0), -14.7 (A2, 0.0), 21.4 (B2, 0.0), 33.4 (B2, 0.1), 34.3 (A2, 0.0), 42.0 (A1, 0.0), 51.8 (B2, 0.1), 52.5 (B1, 0.1), 53.1 (A1, 0.3), 55.3 (B1, 0.0), 55.7 (A2, 0.0), 63.2 (B2, 0.1), 71.5 (A1, 0.0), 71.9 (B2, 0.6), 72.2 (A2, 0.0), 82.4 (A1, 0.4), 83.9 (A2, 0.0), 85.3 (B1, 0.0), 85.6 (B2, 0.0), 88.7 (B1, 0.1), 90.8 (A1, 0.0), 93.3 (A1, 0.0), 97.1 (B2, 0.1), 102.9 (B1, 0.1), 106.0 (A2, 0.0), 109.6 (B2, 0.1), 111.5 (B1, 0.2), 121.6 (A1, 0.1), 126.1 (A2, 0.0), 136.5 (B2, 0.7), 137.9 (B1, 0.0), 144.2 (A1, 0.7), 166.2 (A2, 0.0), 169.9 (B1, 0.0), 170.9 (A1, 0.2), 182.9 (A1, 1.7), 186.9 (B1, 1.1), 205.2 (B2, 2.9), 238.0 (A1, 4.9), 240.5 (B1, 2.3), 280.1 (A1, 10.2), 317.6 (A2, 0.0), 379.9 (A1, 0.7), 380.4 (B2, 0.5), 404.7 (B2, 1.3), 406.1 (B2, 0.5), 408.5 (A2, 0.0), 409.3 (A1, 1.8), 411.2 (B1, 0.2), 420.6 (A2, 0.0), 423.5 (A1, 24.6), 425.7 (A2, 0.0), 436.0 (B2, 8.6), 436.4 (B1, 1.4), 443.7 (A1, 1.3), 445.7 (B1, 0.4), 459.9 (B2, 1.2), 470.3 (B1, 19), 471.0 (A1, 12.9), 471.1 (B2, 2.3), 474.5 (A1, 6.5), 478.1 (A2, 0.0), 480.4 (A1, 1.1), 482.7 (B2, 0.9), 485.1 (A1, 1.6), 490.9 (B2, 14.0), 495.2 (B1, 5.7), 497.4 (B2, 2.4), 501.0 (A2, 0.0), 501.6 (A1, 0.3), 513.7 (A2, 0.0), 520.5 (B1, 1.1), 531.7 (B1, 33.4), 545.7 (B2, 0.0), 550.8 (A1, 1.4), 570.0 (A2, 0.0), 577.1 (B1, 10.4), 600.2 (B2, 98.5), 606.2 (B1, 23.7), 608.1 (A1, 194.6), 613.2 (A2, 0.0), 616.0 (B1, 0.1), 623.3 (B2, 7.0), 629.1 (B1, 614.5), 632.8 (A2, 0.0), 634.5 (A1, 300.4), 642.7 (A1, 6.3), 651.1 (B2, 348.1), 665.6 (A1, 27.2), 1931 (B2, 572), 1954 (A1, 198), 2048 (A2, 0), 2061 (B2, 133), 2067 (B1, 42), 2070 (B2, 447), 2073 (A1, 1188), 2073 (A2, 0), 2077 (B2, 16), 2082 (A1, 138), 2091 (B1, 151), 2098 (A1, 295), 2111 (B1, 2830), 2113 (B2, 2044), 2129 (A1, 1794), 2167 (A1, 83) | -15.7 (A2, 0.0), 14.8 (B2, 0.0), 30.3 (A2, 0.0), 31.4 (A1, 0.0), 37.7 (B2, 0.0), 51.0 (B1, 0.0), 55.2 (B2, 0.3), 56.1 (A1, 0.2), 57.0 (A2, 0.0), 59.9 (B1, 0.1), 63.7 (B2, 0.0), 67.7 (A1, 0.0), 67.8 (A2, 0.0), 72.6 (A2, 0.0), 74.3 (B2, 0.3), 83.9 (A1, 0.2), 84.8 (B1, 0.0), 87.1 (A1, 0.0), 87.8 (A2, 0.0), 87.9 (B2, 0.0), 90.5 (B1, 0.2), 97.1 (B2, 0.1), 99.4 (A1, 0.0), 102.1 (B1, 0.1), 105.2 (A2, 0.0), 106.8 (A1, 0.0), 107.1 (B1, 0.2), 107.8 (A2, 0.0), 108.3 (B2, 0.2), 124.9 (A1, 1.2), 126.1 (B2, 0.8), 132.8 (B1, 0.0), 139.1 (B1, 0.0), 145.7 (A1, 0.0), 162.1 (B1, 0.4), 169.1 (A1, 2.8), 171.6 (A2, 0.0), 188.8 (B2, 5.3), 235.7 (A1, 10.1), 239.7 (B1, 3.7), 260.5 (A1, 17.0), 319.8 (A2, 0.0), 380.3 (B2, 0.4), 390.9 (A1, 0.1), 391.7 (A1, 1.0), 393.1 (B2, 0.9), 395.5 (A2, 0.0), 396.9 (B2, 1.0), 397.5 (B1, 0.0), 412.3 (A2, 0.0), 418.7 (A2, 0.0), 419.8 (A1, 17.3), 425.9 (B1, 4.5), 431.6 (B1, 0.7), 444.6 (B2, 2.5), 446.1 (B2, 3.1), 450.2 (A1, 0.1), 471.0 (A1, 5.7), 472.6 (A2, 0.0), 473.3 (B2, 6.2), 477.9 (A1, 4.6), 484.6 (A1, 0.2), 487.1 (B2, 1.0), 488.4 (B1, 6.0), 494.7 (B2, 4.4), 497.3 (B2, 0.9), 501.6 (A1, 0.7), 503.7 (B1, 2.2), 504.0 (A1, 2.1), 505.1 (A2, 0.0), 515.8 (B1, 28.1), 527.7 (A2, 0.0), 533.1 (B1, 13.1), 537.9 (A1, 4.7), 539.6 (B2, 0.0), 555.5 (A2, 0.0), 559.3 (B1, 6.4), 597.8 (B1, 56.0), 599.0 (B2, 97.0), 606.4 (A2, 0.0), 607.6 (B1, 51.1), 607.6 (A1, 145.1), 622.9 (B2, 0.0), 624.6 (A2, 0.0), 628.9 (A1, 314.9), 634.4 (B1, 531.6), 636.3 (A1, 17.0), 642.0 (B2, 325.3), 646.5 (A1, 7.7), 1858.6 (B2, 534.9), 1875.7 (A1, 219.6), 1968.0 (A2, 0.0), 1981.6 (B2, 241.3), 1986.4 (B1, 69.2), 1991.1 (B2, 500.3), 1991.6 (A2, 0.0), 1993.7 (A1, 1323.4), 1998.0 (B2, 8.7), 2001.3 (A1, 0.9), 2008.0 (B1, 330.7), 2015.3 (A1, 264.1), 2028.9 (B1, 2574.2), 2037.0 (B2, 1773.7), 2046.5 (A1, 1473.3), 2083.3 (A1, 92.7) |

**Table S18.** Theoretical harmonic vibrational frequencies (in  $\text{cm}^{-1}$ ) for the structure **15S-1** using the M06-L/TZP and BP86/DZP methods

| M06-L/TZP                                                                                                                                                                                                                                                                                                                                                                                                                                                                                                                                                                                                                                                                                                                                                                                                                                                                                                                                                                                                                                                                                                                                                                                                                                                                                                                                                                                                                                                                                                                                                                                                                  | BP86/DZP                                                                                                                                                                                                                                                                                                                                                                                                                                                                                                                                                                                                                                                                                                                                                                                                                                                                                                                                                                                                                                                                                                                                                                                                                                                                                                                                                                                                                                                                                                                                                                                                                                                                         |
|----------------------------------------------------------------------------------------------------------------------------------------------------------------------------------------------------------------------------------------------------------------------------------------------------------------------------------------------------------------------------------------------------------------------------------------------------------------------------------------------------------------------------------------------------------------------------------------------------------------------------------------------------------------------------------------------------------------------------------------------------------------------------------------------------------------------------------------------------------------------------------------------------------------------------------------------------------------------------------------------------------------------------------------------------------------------------------------------------------------------------------------------------------------------------------------------------------------------------------------------------------------------------------------------------------------------------------------------------------------------------------------------------------------------------------------------------------------------------------------------------------------------------------------------------------------------------------------------------------------------------|----------------------------------------------------------------------------------------------------------------------------------------------------------------------------------------------------------------------------------------------------------------------------------------------------------------------------------------------------------------------------------------------------------------------------------------------------------------------------------------------------------------------------------------------------------------------------------------------------------------------------------------------------------------------------------------------------------------------------------------------------------------------------------------------------------------------------------------------------------------------------------------------------------------------------------------------------------------------------------------------------------------------------------------------------------------------------------------------------------------------------------------------------------------------------------------------------------------------------------------------------------------------------------------------------------------------------------------------------------------------------------------------------------------------------------------------------------------------------------------------------------------------------------------------------------------------------------------------------------------------------------------------------------------------------------|
| 25.9 (A, 0.1), 28.6 (A, 0.0), 31.4 (B, 0.0), 37.8 (A, 0.1), 46.3 (B, 0.2), 51.8 (B, 0.2), 56.5 (A, 0.0), 60.7 (B, 0.1), 71.6 (B, 0.0), 72.1 (A, 0.0), 72.7 (B, 0.1), 74.1 (A, 0.4), 75.9 (A, 0.3), 77.3 (B, 0.0), 81.9 (B, 0.3), 84.7 (A, 0.0), 87.6 (A, 0.0), 89.4 (A, 0.0), 90.8 (B, 0.1), 93.6 (B, 0.2), 97.9 (B, 0.8), 98.7 (A, 0.1), 100.3 (B, 1.1), 107.5 (A, 0.5), 113.1 (B, 0.1), 114.7 (A, 0.0), 121.9 (A, 0.6), 124.5 (B, 0.2), 127.0 (B, 0.3), 133.5 (B, 0.1), 134.3 (A, 2.2), 140.0 (A, 0.5), 143.7 (B, 0.0), 158.0 (B, 0.3), 178.7 (A, 3.0), 200.3 (A, 1.8), 223.7 (A, 2.3), 262.5 (B, 3.0), 288.2 (B, 3.5), 393.4 (A, 2.8), 393.5 (B, 7.1), 396.9 (A, 0.7), 404.8 (A, 3.5), 405.0 (B, 4.4), 422.3 (B, 4.3), 423.2 (A, 2.4), 431.1 (B, 47.0), 432.6 (A, 6.1), 434.5 (B, 33.2), 438.2 (B, 0.7), 440.3 (A, 7.7), 441.4 (B, 1.4), 443.9 (A, 0.1), 448.7 (B, 5.0), 471.2 (A, 1.5), 475.4 (B, 44.6), 477.2 (A, 3.0), 482.1 (A, 0.1), 482.4 (B, 1.8), 483.6 (B, 0.0), 486.4 (B, 15.7), 488.0 (A, 5.0), 493.8 (B, 18.1), 496.8 (A, 4.4), 500.2 (A, 0.0), 500.2 (B, 18.5), 505.4 (A, 0.0), 511.4 (A, 0.3), 514.7 (B, 12.8), 570.3 (A, 2.6), 570.6 (B, 4.6), 578.7 (B, 1.4), 608.5 (A, 0.1), 608.7 (B, 24.5), 610.9 (A, 12.7), 614.7 (B, 59.5), 622.6 (A, 167.9), 622.7 (B, 132.4), 625.3 (B, 173.5), 631.1 (A, 28.6), 643.0 (A, 261.5), 643.5 (B, 265.8), 653.8 (A, 4.2), 666.1 (B, 161.4), 1916 (A, 407), 2031 (A, 4), 2038 (B, 125), 2047 (A, 30), 2058 (B, 25), 2065 (B, 48), 2067 (A, 34), 2070 (A, 1), 2073 (B, 305), 2087 (B, 1840), 2088 (A, 529), 2090 (B, 1228), 2104 (A, 2319), 2120 (B, 2958), 2161 (A, 0) | 15.6 (B, 0.0), 21.1 (A, 0.0), 21.8 (A, 0.1), 31.0 (A, 0.1), 37.8 (B, 0.1), 41.2 (B, 0.4), 48.4 (A, 0.0), 55.4 (B, 0.2), 55.9 (A, 0.6), 63.8 (B, 0.1), 66.1 (B, 0.0), 69.1 (B, 0.0), 69.2 (A, 0.1), 70.0 (A, 0.0), 73.6 (B, 0.3), 81.5 (A, 0.1), 83.4 (B, 0.2), 87.3 (A, 0.0), 91.3 (A, 0.0), 91.5 (B, 0.0), 93.8 (B, 0.3), 95.6 (A, 0.0), 99.5 (A, 0.4), 102.0 (B, 0.7), 104.0 (A, 0.2), 105.3 (B, 0.1), 111.3 (A, 0.0), 112.4 (B, 0.1), 114.4 (B, 0.3), 115.8 (A, 0.0), 123.1 (B, 0.1), 128.1 (B, 0.0), 128.6 (A, 2.7), 153.2 (B, 0.6), 163.4 (A, 2.6), 193.3 (A, 3.5), 221.8 (A, 4.1), 258.6 (B, 7.8), 272.5 (B, 4.1), 379.2 (B, 3.5), 381.0 (A, 3.3), 388.1 (A, 2.4), 389.4 (B, 1.6), 394.6 (A, 0.0), 413.0 (B, 0.3), 417.9 (A, 0.1), 421.3 (A, 1.1), 422.1 (B, 5.6), 422.9 (B, 1.3), 424.2 (B, 3.9), 442.4 (A, 12.9), 449.7 (B, 1.4), 452.8 (B, 17.9), 454.8 (A, 4.5), 456.8 (A, 0.1), 457.9 (A, 0.2), 462.0 (B, 54.2), 474.2 (B, 50.5), 478.8 (A, 0.2), 484.7 (B, 8.4), 486.6 (A, 0.0), 495.3 (B, 4.8), 496.3 (A, 0.9), 498.4 (B, 4.4), 507.0 (A, 4.6), 508.4 (B, 12.1), 521.6 (A, 0.0), 523.9 (B, 1.7), 523.9 (A, 0.4), 554.4 (A, 1.8), 555.6 (B, 1.3), 562.4 (B, 1.5), 593.8 (A, 1.3), 602.4 (A, 52.5), 604.1 (B, 32.7), 606.7 (A, 2.1), 608.7 (B, 47.0), 612.9 (B, 117.9), 621.2 (B, 69.4), 630.3 (A, 87.1), 630.5 (B, 328.6), 636.1 (A, 293.7), 641.8 (A, 0.6), 658.8 (B, 149.3), 1834.3 (A, 372.2), 1954.6 (A, 4.7), 1963.2 (B, 96.8), 1971.0 (A, 28.0), 1983.5 (B, 85.1), 1985.9 (B, 25.7), 1991.0 (A, 181.7), 1991.6 (A, 29.4), 1996.8 (B, 488.4), 2003.8 (B, 2690.3), 2007.0 (A, 321.8), 2012.8 (B, 420.4), 2025.5 (A, 2159.3), 2039.8 (B, 2599.9), 2078.1 (A, 0.7) |

**Table S19.** Theoretical harmonic vibrational frequencies (in  $\text{cm}^{-1}$ ) for the structure **15S-2** using the M06-L/TZP and BP86/DZP methods

| M06-L/TZP                                                                                                                                                                                                                                                                                                                                                                                                                                                                                                                                                                                                                                                                                                                                                                                                                                                                                                                                                                                                                                                                                                                                                                                                                                                                                                                                                                                                                                                                                                                                                                                                                        | BP86/DZP                                                                                                                                                                                                                                                                                                                                                                                                                                                                                                                                                                                                                                                                                                                                                                                                                                                                                                                                                                                                                                                                                                                                                                                                                                                                                                                                                                                                                                                                                                                                                                                                                                                                                    |
|----------------------------------------------------------------------------------------------------------------------------------------------------------------------------------------------------------------------------------------------------------------------------------------------------------------------------------------------------------------------------------------------------------------------------------------------------------------------------------------------------------------------------------------------------------------------------------------------------------------------------------------------------------------------------------------------------------------------------------------------------------------------------------------------------------------------------------------------------------------------------------------------------------------------------------------------------------------------------------------------------------------------------------------------------------------------------------------------------------------------------------------------------------------------------------------------------------------------------------------------------------------------------------------------------------------------------------------------------------------------------------------------------------------------------------------------------------------------------------------------------------------------------------------------------------------------------------------------------------------------------------|---------------------------------------------------------------------------------------------------------------------------------------------------------------------------------------------------------------------------------------------------------------------------------------------------------------------------------------------------------------------------------------------------------------------------------------------------------------------------------------------------------------------------------------------------------------------------------------------------------------------------------------------------------------------------------------------------------------------------------------------------------------------------------------------------------------------------------------------------------------------------------------------------------------------------------------------------------------------------------------------------------------------------------------------------------------------------------------------------------------------------------------------------------------------------------------------------------------------------------------------------------------------------------------------------------------------------------------------------------------------------------------------------------------------------------------------------------------------------------------------------------------------------------------------------------------------------------------------------------------------------------------------------------------------------------------------|
| 7.0 (A, 0.0), 11.4 (A, 0.0), 18.6 (A, 0.0), 25.6 (A, 0.2), 29.1 (A, 0.1), 31.9 (A, 0.0), 41.5 (A, 0.3), 44.5 (A, 0.0), 56.1 (A, 0.2), 62.0 (A, 0.1), 69.7 (A, 0.1), 71.3 (A, 0.1), 72.9 (A, 0.0), 74.1 (A, 0.1), 78.7 (A, 0.1), 82.4 (A, 0.1), 83.5 (A, 0.1), 86.5 (A, 0.3), 90.0 (A, 0.0), 93.1 (A, 0.0), 94.8 (A, 0.2), 97.4 (A, 0.6), 98.5 (A, 0.3), 106.2 (A, 0.0), 108.8 (A, 0.2), 114.1 (A, 0.3), 116.4 (A, 0.1), 127.6 (A, 0.1), 134.8 (A, 0.4), 137.0 (A, 3.4), 150.9 (A, 0.3), 152.2 (A, 0.1), 162.4 (A, 1.1), 174.0 (A, 0.7), 206.4 (A, 4.1), 235.9 (A, 1.6), 252.7 (A, 1.4), 282.9 (A, 10.0), 345.5 (A, 55.6), 383.3 (A, 0.4), 392.4 (A, 1.2), 399.4 (A, 4.5), 401.5 (A, 30.8), 406.5 (A, 2.0), 408.2 (A, 1.5), 409.9 (A, 1.6), 414.0 (A, 5.6), 427.2 (A, 1.1), 432.7 (A, 11.5), 439.1 (A, 4.1), 440.8 (A, 6.7), 443.3 (A, 2.3), 449.3 (A, 0.8), 458.5 (A, 4.7), 461.4 (A, 1.2), 465.1 (A, 7.5), 472.2 (A, 4.7), 476.7 (A, 1.0), 478.3 (A, 27.4), 484.3 (A, 2.3), 486.9 (A, 1.3), 495.5 (A, 2.9), 502.4 (A, 1.7), 504.9 (A, 3.6), 509.6 (A, 9.0), 514.5 (A, 6.2), 521.6 (A, 11.1), 530.7 (A, 7.9), 535.8 (A, 10.5), 566.8 (A, 19.7), 567.4 (A, 35.5), 574.6 (A, 15.9), 576.5 (A, 28.7), 591.6 (A, 68.5), 614.8 (A, 10.7), 616.1 (A, 93.2), 619.4 (A, 0.2), 626.0 (A, 289.5), 631.3 (A, 49.6), 633.9 (A, 103.5), 637.3 (A, 32.4), 643.6 (A, 393.0), 660.0 (A, 54.4), 681.4 (A, 230.8), 1543 (A, 588), 1931 (A, 366), 2043 (A, 250), 2053 (A, 35), 2068 (A, 58), 2073 (A, 508), 2075 (A, 461), 2078 (A, 97), 2080 (A, 473), 2082 (A, 218), 2093 (A, 2565), 2098 (A, 691), 2113 (A, 1996), 2129 (A, 1878), 2161 (A, 231) | 10.4 (A, 0.0), 14.6 (A, 0.0), 20.4 (A, 0.1), 23.5 (A, 0.2), 26.2 (A, 0.0), 27.6 (A, 0.1), 37.0 (A, 0.1), 39.2 (A, 0.1), 51.8 (A, 0.3), 65.3 (A, 0.0), 66.8 (A, 0.0), 68.1 (A, 0.0), 72.6 (A, 0.1), 73.8 (A, 0.1), 77.3 (A, 0.2), 78.8 (A, 0.2), 81.8 (A, 0.3), 85.9 (A, 0.2), 88.0 (A, 0.1), 89.6 (A, 0.3), 93.4 (A, 0.1), 94.1 (A, 0.1), 99.5 (A, 0.1), 103.5 (A, 0.8), 103.9 (A, 0.3), 111.1 (A, 0.1), 115.8 (A, 0.9), 118.4 (A, 0.4), 121.2 (A, 0.5), 127.0 (A, 0.1), 130.9 (A, 1.6), 136.7 (A, 2.5), 138.4 (A, 1.8), 163.6 (A, 0.6), 186.5 (A, 7.4), 228.4 (A, 1.4), 242.5 (A, 4.5), 254.9 (A, 2.5), 306.1 (A, 49.8), 371.8 (A, 0.4), 382.7 (A, 1.6), 384.1 (A, 0.7), 393.1 (A, 2.7), 395.0 (A, 0.2), 395.8 (A, 0.0), 397.3 (A, 6.8), 407.5 (A, 5.6), 414.4 (A, 0.9), 423.9 (A, 5.4), 427.3 (A, 1.3), 436.6 (A, 1.9), 445.4 (A, 6.1), 447.8 (A, 4.0), 450.8 (A, 9.3), 453.1 (A, 2.2), 457.7 (A, 3.0), 466.9 (A, 2.0), 472.0 (A, 4.4), 484.1 (A, 0.3), 490.0 (A, 14.0), 490.8 (A, 1.1), 496.3 (A, 2.1), 500.8 (A, 1.9), 502.6 (A, 3.3), 505.2 (A, 13.6), 522.0 (A, 14.1), 525.0 (A, 3.4), 529.9 (A, 4.2), 538.9 (A, 12.7), 553.0 (A, 0.6), 556.5 (A, 1.4), 557.4 (A, 10.4), 577.6 (A, 117.0), 584.4 (A, 39.7), 603.9 (A, 47.3), 607.2 (A, 55.4), 616.1 (A, 80.5), 618.9 (A, 18.9), 626.8 (A, 60.7), 629.8 (A, 216.7), 632.9 (A, 339.7), 634.4 (A, 33.3), 643.2 (A, 25.5), 669.7 (A, 281.9), 1540.3 (A, 510.5), 1848.6 (A, 335.9), 1964.9 (A, 235.7), 1972.3 (A, 55.6), 1988.2 (A, 75.2), 1990.6 (A, 172.5), 1993.7 (A, 715.1), 2000.2 (A, 612.2), 2000.7 (A, 161.0), 2002.4 (A, 109.0), 2009.0 (A, 2476.2), 2014.7 (A, 583.3), 2035.3 (A, 1756.9), 2044.8 (A, 1810.2), 2077.7 (A, 234.4) |

**Table S20.** Theoretical harmonic vibrational frequencies (in  $\text{cm}^{-1}$ ) for the structure **15T-1** using the M06-L/TZP and BP86/DZP methods

| M06-L/TZP                                                                                                                                                                                                                                                                                                                                                                                                                                                                                                                                                                                                                                                                                                                                                                                                                                                                                                                                                                                                                                                                                                                                                                                                                                                                                                                                                                                                                                                                                                                                                                                                                         | BP86/DZP                                                                                                                                                                                                                                                                                                                                                                                                                                                                                                                                                                                                                                                                                                                                                                                                                                                                                                                                                                                                                                                                                                                                                                                                                                                                                                                                                                                                                                                                                                                                                                                                                                                                                |
|-----------------------------------------------------------------------------------------------------------------------------------------------------------------------------------------------------------------------------------------------------------------------------------------------------------------------------------------------------------------------------------------------------------------------------------------------------------------------------------------------------------------------------------------------------------------------------------------------------------------------------------------------------------------------------------------------------------------------------------------------------------------------------------------------------------------------------------------------------------------------------------------------------------------------------------------------------------------------------------------------------------------------------------------------------------------------------------------------------------------------------------------------------------------------------------------------------------------------------------------------------------------------------------------------------------------------------------------------------------------------------------------------------------------------------------------------------------------------------------------------------------------------------------------------------------------------------------------------------------------------------------|-----------------------------------------------------------------------------------------------------------------------------------------------------------------------------------------------------------------------------------------------------------------------------------------------------------------------------------------------------------------------------------------------------------------------------------------------------------------------------------------------------------------------------------------------------------------------------------------------------------------------------------------------------------------------------------------------------------------------------------------------------------------------------------------------------------------------------------------------------------------------------------------------------------------------------------------------------------------------------------------------------------------------------------------------------------------------------------------------------------------------------------------------------------------------------------------------------------------------------------------------------------------------------------------------------------------------------------------------------------------------------------------------------------------------------------------------------------------------------------------------------------------------------------------------------------------------------------------------------------------------------------------------------------------------------------------|
| 9.3 (A, 0.1), 21.4 (A, 0.1), 23.1 (A, 0.0), 25.5 (A, 0.1), 30.5 (A, 0.2), 33.4 (A, 0.2), 41.8 (A, 0.1), 43.0 (A, 0.3), 46.5 (A, 0.2), 54.3 (A, 0.2), 63.6 (A, 0.3), 68.8 (A, 0.2), 68.9 (A, 1.3), 70.8 (A, 0.1), 71.3 (A, 0.3), 76.1 (A, 0.3), 78.3 (A, 0.1), 80.7 (A, 0.0), 82.7 (A, 0.1), 85.9 (A, 0.1), 88.4 (A, 0.2), 89.8 (A, 0.1), 93.4 (A, 0.1), 94.2 (A, 0.1), 95.9 (A, 1.1), 97.8 (A, 1.1), 101.2 (A, 0.2), 106.1 (A, 0.6), 112.3 (A, 1.7), 119.6 (A, 2.0), 123.2 (A, 0.9), 133.0 (A, 0.7), 134.4 (A, 0.2), 147.4 (A, 0.3), 150.3 (A, 1.0), 173.2 (A, 0.1), 204.2 (A, 3.6), 220.6 (A, 0.2), 295.5 (A, 29.5), 341.2 (A, 0.4), 368.3 (A, 13.5), 371.8 (A, 3.6), 392.8 (A, 0.0), 395.0 (A, 1.2), 403.4 (A, 15.6), 406.9 (A, 5.0), 408.8 (A, 0.8), 412.1 (A, 0.6), 415.8 (A, 8.3), 425.5 (A, 2.2), 428.6 (A, 14.3), 437.9 (A, 3.5), 440.7 (A, 15.9), 442.4 (A, 1.0), 452.5 (A, 0.9), 454.9 (A, 4.8), 458.0 (A, 3.0), 468.7 (A, 10.7), 473.0 (A, 20.1), 473.3 (A, 22.4), 478.2 (A, 7.9), 482.6 (A, 1.1), 487.0 (A, 0.7), 494.7 (A, 1.7), 496.1 (A, 0.3), 499.7 (A, 2.9), 515.3 (A, 20.9), 517.9 (A, 98.3), 521.0 (A, 1.8), 525.4 (A, 14.2), 553.4 (A, 50.8), 562.0 (A, 81.4), 563.7 (A, 14.0), 567.6 (A, 314.2), 568.8 (A, 52.2), 577.9 (A, 28.6), 581.9 (A, 22.1), 600.3 (A, 29.6), 611.4 (A, 72.3), 613.1 (A, 100.9), 617.0 (A, 10.5), 634.1 (A, 197.8), 639.8 (A, 331.9), 655.8 (A, 57.3), 1998 (A, 769), 2018 (A, 321), 2032 (A, 205), 2037 (A, 66), 2048 (A, 21), 2058 (A, 58), 2063 (A, 244), 2068 (A, 932), 2074 (A, 314), 2078 (A, 994), 2083 (A, 1148), 2088 (A, 865), 2108 (A, 2088), 2115 (A, 1863), 2154 (A, 286) | 10.2 (A, 0.0), 14.6 (A, 0.1), 18.6 (A, 0.1), 20.3 (A, 0.1), 29.5 (A, 0.0), 32.8 (A, 0.0), 37.2 (A, 0.1), 40.3 (A, 0.1), 42.8 (A, 0.2), 51.9 (A, 0.9), 53.0 (A, 0.2), 68.7 (A, 0.1), 70.5 (A, 0.1), 73.6 (A, 0.1), 75.0 (A, 0.2), 76.1 (A, 1.7), 78.3 (A, 0.3), 79.5 (A, 0.3), 80.5 (A, 0.1), 81.6 (A, 0.5), 85.7 (A, 0.5), 86.1 (A, 0.0), 90.3 (A, 0.1), 93.6 (A, 0.0), 94.9 (A, 0.0), 96.8 (A, 0.2), 98.5 (A, 0.6), 100.4 (A, 0.3), 102.5 (A, 0.5), 107.9 (A, 3.7), 117.3 (A, 0.7), 122.3 (A, 1.4), 125.9 (A, 4.1), 128.6 (A, 0.7), 142.7 (A, 0.8), 175.1 (A, 0.3), 186.0 (A, 6.0), 222.4 (A, 2.8), 296.0 (A, 44.9), 345.7 (A, 0.0), 359.8 (A, 8.6), 364.4 (A, 0.1), 380.5 (A, 0.5), 381.2 (A, 0.9), 392.3 (A, 2.2), 393.6 (A, 0.4), 395.8 (A, 0.1), 412.2 (A, 0.7), 422.5 (A, 8.6), 424.4 (A, 3.3), 427.9 (A, 27.1), 435.7 (A, 0.3), 449.8 (A, 6.8), 450.3 (A, 3.7), 454.0 (A, 6.4), 461.5 (A, 2.4), 468.0 (A, 3.3), 470.0 (A, 43.6), 471.8 (A, 2.1), 475.1 (A, 1.5), 484.4 (A, 74.4), 485.3 (A, 18.7), 490.1 (A, 1.8), 495.7 (A, 1.9), 501.1 (A, 0.1), 502.8 (A, 0.8), 505.9 (A, 0.9), 512.1 (A, 67.5), 525.6 (A, 2.4), 528.9 (A, 0.6), 551.0 (A, 31.2), 552.8 (A, 70.6), 553.7 (A, 15.9), 558.1 (A, 34.9), 572.9 (A, 240.3), 579.0 (A, 39.6), 585.3 (A, 48.3), 597.3 (A, 83.3), 604.8 (A, 74.3), 606.6 (A, 48.8), 616.8 (A, 53.0), 628.9 (A, 226.5), 631.1 (A, 322.5), 640.8 (A, 6.8), 1937.4 (A, 620.7), 1942.7 (A, 302.4), 1960.8 (A, 119.3), 1964.4 (A, 62.9), 1969.4 (A, 105.1), 1981.8 (A, 456.1), 1983.7 (A, 41.5), 1987.3 (A, 566.3), 1991.4 (A, 1603.5), 1999.8 (A, 538.5), 2001.5 (A, 762.8), 2005.6 (A, 524.9), 2029.9 (A, 1729.7), 2030.7 (A, 1918.8), 2071.3 (A, 282.9) |

**Table S21.** Theoretical harmonic vibrational frequencies (in  $\text{cm}^{-1}$ ) for the structure **14S-1** using the M06-L/TZP and BP86/DZP methods

| M06-L/TZP                                                                                                                                                                                                                                                                                                                                                                                                                                                                                                                                                                                                                                                                                                                                                                                                                                                                                                                                                                                                                                                                                                                                                                                                                                                                                                                                                                                                                                                                                                                          | BP86/DZP                                                                                                                                                                                                                                                                                                                                                                                                                                                                                                                                                                                                                                                                                                                                                                                                                                                                                                                                                                                                                                                                                                                                                                                                                                                                                                                                                                                                                                                                                                                                                                              |
|------------------------------------------------------------------------------------------------------------------------------------------------------------------------------------------------------------------------------------------------------------------------------------------------------------------------------------------------------------------------------------------------------------------------------------------------------------------------------------------------------------------------------------------------------------------------------------------------------------------------------------------------------------------------------------------------------------------------------------------------------------------------------------------------------------------------------------------------------------------------------------------------------------------------------------------------------------------------------------------------------------------------------------------------------------------------------------------------------------------------------------------------------------------------------------------------------------------------------------------------------------------------------------------------------------------------------------------------------------------------------------------------------------------------------------------------------------------------------------------------------------------------------------|---------------------------------------------------------------------------------------------------------------------------------------------------------------------------------------------------------------------------------------------------------------------------------------------------------------------------------------------------------------------------------------------------------------------------------------------------------------------------------------------------------------------------------------------------------------------------------------------------------------------------------------------------------------------------------------------------------------------------------------------------------------------------------------------------------------------------------------------------------------------------------------------------------------------------------------------------------------------------------------------------------------------------------------------------------------------------------------------------------------------------------------------------------------------------------------------------------------------------------------------------------------------------------------------------------------------------------------------------------------------------------------------------------------------------------------------------------------------------------------------------------------------------------------------------------------------------------------|
| 24.4 (A, 0.1), 26.9 (A, 0.2), 36.8 (A, 0.2), 41.2 (A, 0.2), 46.4 (A, 0.0), 61.0 (A, 0.0), 68.1 (A, 0.1), 72.4 (A, 0.0), 79.1 (A, 0.1), 80.7 (A, 0.3), 81.0 (A, 0.1), 83.0 (A, 1.7), 85.5 (A, 0.1), 88.1 (A, 0.1), 90.4 (A, 0.1), 92.2 (A, 0.2), 93.6 (A, 1.0), 99.2 (A, 0.5), 101.0 (A, 0.2), 106.9 (A, 1.3), 108.5 (A, 0.2), 113.6 (A, 0.5), 118.8 (A, 0.0), 119.4 (A, 1.6), 124.3 (A, 0.1), 129.9 (A, 0.3), 131.6 (A, 0.3), 138.8 (A, 0.6), 145.5 (A, 0.3), 148.0 (A, 1.4), 156.0 (A, 1.6), 166.3 (A, 2.0), 183.9 (A, 3.3), 203.8 (A, 1.2), 216.4 (A, 1.6), 230.0 (A, 1.5), 275.8 (A, 0.2), 359.9 (A, 4.2), 388.7 (A, 20.3), 401.6 (A, 3.3), 407.4 (A, 0.7), 408.5 (A, 0.7), 414.7 (A, 0.3), 419.9 (A, 5.5), 420.2 (A, 0.3), 426.7 (A, 0.5), 433.0 (A, 9.6), 434.2 (A, 4.4), 445.4 (A, 1.3), 453.8 (A, 0.8), 456.6 (A, 8.9), 474.6 (A, 12.3), 478.2 (A, 0.9), 480.0 (A, 4.1), 483.8 (A, 1.3), 490.5 (A, 4.7), 498.3 (A, 2.8), 501.3 (A, 1.8), 503.2 (A, 3.9), 506.5 (A, 10.4), 510.0 (A, 8.1), 511.2 (A, 3.1), 518.4 (A, 10.2), 520.2 (A, 4.0), 527.2 (A, 3.6), 555.1 (A, 2.0), 566.0 (A, 24.3), 566.2 (A, 33.3), 584.3 (A, 57.7), 593.4 (A, 48.4), 594.3 (A, 99.4), 605.7 (A, 14.8), 611.0 (A, 31.3), 618.1 (A, 59.5), 621.7 (A, 67.6), 629.2 (A, 108.1), 633.1 (A, 253.7), 638.4 (A, 281.1), 656.2 (A, 29.5), 1942 (A, 350), 2014 (A, 298), 2026 (A, 77), 2036 (A, 61), 2047 (A, 152), 2050 (A, 191), 2068 (A, 45), 2082 (A, 98), 2087 (A, 751), 2096 (A, 1934), 2100 (A, 1439), 2102 (A, 1145), 2122 (A, 2644), 2160 (A, 250) | 10.5 (A, 0.3), 25.0 (A, 0.2), 30.6 (A, 0.0), 37.3 (A, 0.0), 43.3 (A, 0.1), 47.5 (A, 0.0), 56.3 (A, 0.2), 61.6 (A, 0.0), 70.6 (A, 0.4), 75.2 (A, 0.4), 75.2 (A, 0.7), 77.8 (A, 0.1), 80.4 (A, 0.2), 82.4 (A, 0.7), 88.1 (A, 0.1), 88.8 (A, 0.3), 91.7 (A, 0.3), 92.4 (A, 1.6), 93.3 (A, 0.7), 98.4 (A, 0.1), 100.2 (A, 0.5), 103.1 (A, 0.2), 107.6 (A, 0.3), 109.0 (A, 0.2), 118.2 (A, 0.0), 119.5 (A, 0.2), 123.1 (A, 0.5), 126.1 (A, 0.1), 126.8 (A, 0.5), 136.2 (A, 0.5), 140.5 (A, 0.6), 158.8 (A, 1.4), 194.5 (A, 0.7), 200.9 (A, 0.3), 230.4 (A, 2.7), 237.3 (A, 5.4), 281.2 (A, 1.3), 367.6 (A, 2.4), 386.6 (A, 13.6), 389.5 (A, 1.0), 392.9 (A, 0.8), 397.1 (A, 4.4), 400.6 (A, 0.1), 403.1 (A, 1.5), 410.9 (A, 0.6), 411.4 (A, 1.3), 417.1 (A, 0.8), 429.1 (A, 10.3), 437.4 (A, 3.2), 441.5 (A, 4.3), 447.0 (A, 3.8), 461.7 (A, 26.6), 475.5 (A, 3.1), 485.8 (A, 17.6), 487.5 (A, 1.6), 493.5 (A, 0.3), 496.4 (A, 3.8), 503.1 (A, 9.6), 506.1 (A, 0.4), 514.3 (A, 3.3), 521.0 (A, 1.1), 522.8 (A, 2.8), 524.6 (A, 1.5), 527.6 (A, 4.3), 539.3 (A, 4.4), 546.8 (A, 0.5), 551.6 (A, 0.4), 567.4 (A, 31.0), 582.3 (A, 13.5), 586.2 (A, 55.8), 590.2 (A, 66.1), 598.9 (A, 32.0), 603.4 (A, 2.9), 607.4 (A, 123.9), 614.4 (A, 86.1), 620.9 (A, 102.8), 629.1 (A, 205.9), 636.1 (A, 215.7), 640.5 (A, 92.6), 1849.3 (A, 342.8), 1948.9 (A, 296.5), 1956.0 (A, 1.3), 1963.8 (A, 169.7), 1968.0 (A, 195.6), 1975.8 (A, 98.8), 1987.7 (A, 28.9), 2005.2 (A, 248.1), 2007.6 (A, 87.4), 2015.3 (A, 2251.3), 2020.0 (A, 1936.7), 2022.3 (A, 824.1), 2041.4 (A, 2012.5), 2078.6 (A, 282.7) |

**Table S22.** Theoretical harmonic vibrational frequencies (in  $\text{cm}^{-1}$ ) for the structure **14S-2** using the M06-L/TZP and BP86/DZP methods

| M06-L/TZP                                                                                                                                                                                                                                                                                                                                                                                                                                                                                                                                                                                                                                                                                                                                                                                                                                                                                                                                                                                                                                                                                                                                                                                                                                                                                                                                                                                                                                                                                                                         | BP86/DZP                                                                                                                                                                                                                                                                                                                                                                                                                                                                                                                                                                                                                                                                                                                                                                                                                                                                                                                                                                                                                                                                                                                                                                                                                                                                                                                                                                                                                                                                                                                                                                          |
|-----------------------------------------------------------------------------------------------------------------------------------------------------------------------------------------------------------------------------------------------------------------------------------------------------------------------------------------------------------------------------------------------------------------------------------------------------------------------------------------------------------------------------------------------------------------------------------------------------------------------------------------------------------------------------------------------------------------------------------------------------------------------------------------------------------------------------------------------------------------------------------------------------------------------------------------------------------------------------------------------------------------------------------------------------------------------------------------------------------------------------------------------------------------------------------------------------------------------------------------------------------------------------------------------------------------------------------------------------------------------------------------------------------------------------------------------------------------------------------------------------------------------------------|-----------------------------------------------------------------------------------------------------------------------------------------------------------------------------------------------------------------------------------------------------------------------------------------------------------------------------------------------------------------------------------------------------------------------------------------------------------------------------------------------------------------------------------------------------------------------------------------------------------------------------------------------------------------------------------------------------------------------------------------------------------------------------------------------------------------------------------------------------------------------------------------------------------------------------------------------------------------------------------------------------------------------------------------------------------------------------------------------------------------------------------------------------------------------------------------------------------------------------------------------------------------------------------------------------------------------------------------------------------------------------------------------------------------------------------------------------------------------------------------------------------------------------------------------------------------------------------|
| 10.6 (A, 0.1), 23.6 (A, 0.0), 32.7 (A, 0.1), 37.2 (A, 0.1), 42.3 (A, 0.1), 44.3 (A, 0.1), 46.5 (A, 0.0), 50.8 (A, 0.0), 56.6 (A, 0.9), 65.5 (A, 0.1), 70.3 (A, 0.4), 71.7 (A, 0.2), 73.2 (A, 0.1), 75.5 (A, 0.1), 81.9 (A, 0.2), 86.2 (A, 0.3), 89.8 (A, 0.4), 93.0 (A, 0.0), 94.3 (A, 0.3), 99.8 (A, 0.5), 101.2 (A, 0.0), 103.7 (A, 0.3), 104.1 (A, 0.4), 107.8 (A, 0.1), 110.0 (A, 0.0), 117.6 (A, 0.2), 133.1 (A, 0.1), 134.5 (A, 0.1), 137.1 (A, 0.4), 139.8 (A, 0.6), 168.6 (A, 0.5), 173.8 (A, 0.1), 177.4 (A, 1.1), 184.6 (A, 2.0), 215.5 (A, 1.8), 221.1 (A, 1.8), 291.3 (A, 5.2), 324.6 (A, 10.2), 329.7 (A, 2.6), 396.0 (A, 0.4), 402.9 (A, 1.9), 404.7 (A, 0.9), 406.5 (A, 1.2), 408.8 (A, 0.5), 409.9 (A, 0.5), 423.2 (A, 1.3), 424.1 (A, 14.0), 439.1 (A, 3.8), 448.6 (A, 1.0), 450.6 (A, 0.8), 453.4 (A, 1.0), 471.1 (A, 0.7), 473.1 (A, 1.2), 475.1 (A, 3.1), 478.4 (A, 1.3), 485.4 (A, 1.3), 489.6 (A, 0.1), 489.9 (A, 0.2), 491.9 (A, 3.0), 494.9 (A, 5.4), 501.3 (A, 2.4), 506.5 (A, 10.4), 509.6 (A, 10.6), 514.5 (A, 1.4), 519.1 (A, 16.1), 556.3 (A, 9.8), 563.7 (A, 0.0), 568.0 (A, 11.3), 573.2 (A, 36.9), 590.3 (A, 18.2), 607.0 (A, 57.2), 608.4 (A, 10.8), 609.5 (A, 49.7), 616.1 (A, 22.4), 630.3 (A, 255.6), 632.1 (A, 167.2), 639.2 (A, 352.6), 651.5 (A, 102.4), 659.9 (A, 2.5), 1975 (A, 301), 1981 (A, 514), 2025 (A, 325), 2029 (A, 205), 2048 (A, 147), 2066 (A, 194), 2070 (A, 874), 2074 (A, 469), 2086 (A, 20), 2087 (A, 1882), 2089 (A, 12), 2100 (A, 2844), 2113 (A, 2035), 2157 (A, 409) | 14.3 (A, 0.1), 18.7 (A, 0.0), 28.4 (A, 0.1), 30.7 (A, 0.0), 32.9 (A, 0.0), 38.4 (A, 0.2), 42.6 (A, 0.1), 49.2 (A, 0.1), 53.0 (A, 1.0), 60.7 (A, 0.0), 63.1 (A, 0.1), 70.5 (A, 0.2), 72.7 (A, 0.2), 74.7 (A, 0.1), 82.8 (A, 0.1), 84.4 (A, 0.4), 88.6 (A, 0.3), 89.1 (A, 0.6), 91.0 (A, 0.1), 92.7 (A, 0.1), 96.2 (A, 0.0), 99.0 (A, 0.1), 102.3 (A, 0.0), 102.7 (A, 0.4), 107.9 (A, 0.8), 114.6 (A, 0.3), 116.0 (A, 0.3), 123.8 (A, 0.6), 129.6 (A, 0.1), 134.6 (A, 0.8), 158.6 (A, 0.5), 160.4 (A, 1.1), 163.9 (A, 3.8), 167.3 (A, 0.0), 191.6 (A, 3.3), 219.6 (A, 2.2), 274.0 (A, 10.6), 314.6 (A, 10.3), 322.4 (A, 1.1), 382.1 (A, 0.3), 391.1 (A, 0.8), 391.7 (A, 2.3), 392.7 (A, 2.1), 394.8 (A, 0.2), 396.0 (A, 0.7), 413.5 (A, 0.5), 421.5 (A, 7.6), 443.5 (A, 2.3), 444.9 (A, 1.8), 447.4 (A, 5.7), 452.0 (A, 2.2), 452.1 (A, 1.2), 470.5 (A, 3.1), 471.4 (A, 2.5), 479.2 (A, 0.9), 488.0 (A, 0.2), 491.5 (A, 1.2), 491.9 (A, 4.4), 497.2 (A, 0.2), 499.9 (A, 0.9), 508.4 (A, 1.6), 520.6 (A, 2.9), 521.3 (A, 7.9), 522.7 (A, 0.0), 526.3 (A, 8.5), 550.9 (A, 0.9), 553.4 (A, 9.6), 567.5 (A, 1.6), 577.5 (A, 27.7), 590.1 (A, 16.4), 601.7 (A, 61.9), 602.2 (A, 4.4), 604.0 (A, 45.3), 614.5 (A, 22.0), 616.6 (A, 152.7), 626.6 (A, 290.7), 630.7 (A, 321.1), 639.0 (A, 24.7), 643.8 (A, 1.7), 1898.6 (A, 228.9), 1902.6 (A, 504.8), 1956.1 (A, 243.0), 1958.5 (A, 213.1), 1971.4 (A, 134.5), 1988.8 (A, 304.5), 1992.8 (A, 457.6), 1997.3 (A, 834.8), 2004.4 (A, 46.1), 2006.9 (A, 1856.4), 2010.3 (A, 94.6), 2018.1 (A, 2412.1), 2035.4 (A, 1805.3), 2074.7 (A, 376.8) |

**Table S23.** Theoretical harmonic vibrational frequencies (in  $\text{cm}^{-1}$ ) for the structure **14S-3** using the M06-L/TZP and BP86/DZP methods

| M06-L/TZP                                                                                                                                                                                                                                                                                                                                                                                                                                                                                                                                                                                                                                                                                                                                                                                                                                                                                                                                                                                                                                                                                                                                                                                                                                                                                                                                                                                                                                                                                                                         | BP86/DZP |
|-----------------------------------------------------------------------------------------------------------------------------------------------------------------------------------------------------------------------------------------------------------------------------------------------------------------------------------------------------------------------------------------------------------------------------------------------------------------------------------------------------------------------------------------------------------------------------------------------------------------------------------------------------------------------------------------------------------------------------------------------------------------------------------------------------------------------------------------------------------------------------------------------------------------------------------------------------------------------------------------------------------------------------------------------------------------------------------------------------------------------------------------------------------------------------------------------------------------------------------------------------------------------------------------------------------------------------------------------------------------------------------------------------------------------------------------------------------------------------------------------------------------------------------|----------|
| 21.5 (B, 2.1), 23.1 (A, 0.3), 28.3 (A, 0.0), 42.1 (B, 0.2), 44.3 (A, 0.3), 51.4 (A, 0.0), 56.5 (B, 0.0), 63.6 (A, 0.0), 64.4 (B, 0.4), 71.6 (B, 0.6), 74.2 (B, 0.2), 74.9 (A, 0.1), 77.6 (A, 0.0), 82.8 (A, 0.2), 87.6 (B, 1.0), 88.2 (A, 0.1), 89.9 (B, 0.4), 95.5 (B, 0.1), 96.3 (A, 0.3), 98.7 (A, 0.0), 104.1 (B, 0.4), 110.6 (B, 0.0), 114.9 (B, 0.3), 116.5 (A, 0.8), 121.7 (A, 0.2), 127.0 (A, 0.9), 140.9 (B, 1.3), 141.4 (A, 0.1), 145.9 (B, 2.1), 153.9 (A, 1.0), 160.1 (B, 4.8), 163.1 (A, 0.0), 163.6 (B, 0.9), 195.7 (A, 0.9), 210.9 (B, 2.3), 218.2 (A, 0.1), 295.4 (B, 11.1), 374.8 (B, 5.8), 376.3 (A, 5.6), 394.1 (A, 3.8), 397.3 (B, 1.9), 404.1 (B, 1.2), 404.7 (A, 0.2), 413.1 (A, 8.6), 415.3 (B, 7.5), 418.6 (A, 3.3), 419.6 (B, 5.5), 438.9 (B, 3.6), 439.8 (A, 0.4), 449.5 (B, 8.6), 450.3 (A, 0.2), 458.7 (B, 2.4), 460.6 (A, 3.2), 482.5 (A, 0.6), 483.1 (B, 9.3), 487.1 (A, 1.1), 491.0 (B, 6.6), 495.2 (B, 11.9), 496.6 (A, 3.6), 500.6 (B, 8.0), 504.0 (A, 4.8), 511.0 (B, 7.9), 511.6 (A, 1.2), 530.1 (A, 2.8), 536.4 (B, 16.5), 556.7 (B, 17.2), 560.2 (A, 1.9), 586.8 (A, 26.5), 588.6 (B, 19.1), 593.1 (B, 16.5), 600.9 (A, 221.3), 611.0 (B, 55.2), 612.8 (A, 12.4), 621.6 (A, 22.1), 624.4 (B, 92.4), 628.9 (B, 361.6), 630.8 (A, 13.2), 652.3 (B, 63.3), 655.1 (A, 130.5), 2001 (B, 391), 2004 (A, 116), 2035 (B, 292), 2037 (A, 108), 2047 (B, 272), 2054 (A, 116), 2057 (A, 172), 2060 (B, 354), 2072 (A, 1156), 2073 (B, 446), 2089 (A, 1769), 2096 (B, 2489), 2115 (B, 1560), 2149 (A, 4) |          |



**Table S24.** Theoretical harmonic vibrational frequencies (in  $\text{cm}^{-1}$ ) for the structure **14T-1** using the M06-L/TZP and BP86/DZP methods

| M06-L/TZP                                                                                                                                                                                                                                                                                                                                                                                                                                                                                                                                                                                                                                                                                                                                                                                                                                                                                                                                                                                                                                                                                                                                                                                                                                                                                                                                                                                                                                                                                                                            | BP86/DZP                                                                                                                                                                                                                                                                                                                                                                                                                                                                                                                                                                                                                                                                                                                                                                                                                                                                                                                                                                                                                                                                                                                                                                                                                                                                                                                                                                                                                                                                                                                                                                               |
|--------------------------------------------------------------------------------------------------------------------------------------------------------------------------------------------------------------------------------------------------------------------------------------------------------------------------------------------------------------------------------------------------------------------------------------------------------------------------------------------------------------------------------------------------------------------------------------------------------------------------------------------------------------------------------------------------------------------------------------------------------------------------------------------------------------------------------------------------------------------------------------------------------------------------------------------------------------------------------------------------------------------------------------------------------------------------------------------------------------------------------------------------------------------------------------------------------------------------------------------------------------------------------------------------------------------------------------------------------------------------------------------------------------------------------------------------------------------------------------------------------------------------------------|----------------------------------------------------------------------------------------------------------------------------------------------------------------------------------------------------------------------------------------------------------------------------------------------------------------------------------------------------------------------------------------------------------------------------------------------------------------------------------------------------------------------------------------------------------------------------------------------------------------------------------------------------------------------------------------------------------------------------------------------------------------------------------------------------------------------------------------------------------------------------------------------------------------------------------------------------------------------------------------------------------------------------------------------------------------------------------------------------------------------------------------------------------------------------------------------------------------------------------------------------------------------------------------------------------------------------------------------------------------------------------------------------------------------------------------------------------------------------------------------------------------------------------------------------------------------------------------|
| 12.1 (A, 0.1), 27.2 (A, 0.0), 28.3 (A, 0.1), 31.2 (A, 0.0), 44.0 (A, 0.1), 44.9 (A, 0.1), 47.7 (A, 0.1), 52.6 (A, 0.2), 52.9 (A, 0.0), 56.9 (A, 0.2), 58.7 (A, 0.3), 68.0 (A, 0.0), 70.2 (A, 0.1), 75.7 (A, 0.1), 77.8 (A, 1.0), 84.9 (A, 0.2), 87.0 (A, 0.1), 89.1 (A, 0.4), 92.6 (A, 0.0), 94.3 (A, 0.7), 97.4 (A, 0.1), 100.1 (A, 0.3), 102.7 (A, 0.2), 107.5 (A, 0.4), 112.7 (A, 0.4), 119.4 (A, 0.7), 125.7 (A, 0.3), 131.0 (A, 0.1), 136.5 (A, 0.2), 140.9 (A, 0.8), 143.9 (A, 0.8), 157.4 (A, 4.9), 173.2 (A, 2.6), 185.2 (A, 0.9), 207.8 (A, 2.0), 226.1 (A, 2.4), 284.4 (A, 8.3), 307.8 (A, 21.0), 316.0 (A, 9.3), 368.8 (A, 14.5), 378.2 (A, 14.7), 388.7 (A, 1.3), 393.0 (A, 10.5), 398.6 (A, 2.1), 406.6 (A, 1.5), 409.7 (A, 1.0), 411.1 (A, 1.8), 421.7 (A, 8.2), 423.8 (A, 1.6), 424.1 (A, 13.5), 441.8 (A, 3.9), 448.6 (A, 4.7), 449.3 (A, 0.1), 458.5 (A, 12.9), 472.7 (A, 3.6), 474.7 (A, 1.5), 476.1 (A, 12.6), 482.2 (A, 1.6), 484.8 (A, 20.3), 486.0 (A, 8.4), 491.5 (A, 1.4), 499.4 (A, 2.2), 502.4 (A, 1.1), 507.3 (A, 6.4), 512.9 (A, 5.2), 519.8 (A, 6.0), 536.2 (A, 48.4), 549.5 (A, 26.6), 566.4 (A, 14.0), 568.3 (A, 59.5), 570.0 (A, 51.2), 591.3 (A, 20.9), 607.8 (A, 104.8), 609.6 (A, 21.6), 613.3 (A, 67.2), 616.6 (A, 69.8), 632.2 (A, 208.7), 637.5 (A, 360.0), 656.5 (A, 53.0), 1947 (A, 441), 1973 (A, 483), 2016 (A, 332), 2034 (A, 359), 2043 (A, 246), 2061 (A, 47), 2066 (A, 86), 2073 (A, 1165), 2081 (A, 773), 2082 (A, 861), 2086 (A, 876), 2101 (A, 2514), 2108 (A, 1870), 2154 (A, 340) | 17.3 (A, 0.2), 21.5 (A, 0.2), 27.9 (A, 0.0), 31.0 (A, 0.0), 36.8 (A, 0.0), 41.3 (A, 0.2), 43.0 (A, 0.0), 51.2 (A, 0.3), 56.4 (A, 0.4), 57.8 (A, 0.0), 64.6 (A, 0.3), 67.7 (A, 0.1), 73.0 (A, 0.4), 73.9 (A, 0.0), 76.4 (A, 0.4), 83.6 (A, 0.4), 83.8 (A, 0.1), 85.0 (A, 0.3), 90.1 (A, 0.3), 94.3 (A, 0.0), 94.7 (A, 0.7), 96.7 (A, 0.1), 101.0 (A, 0.1), 102.9 (A, 0.3), 103.5 (A, 0.1), 113.5 (A, 0.4), 118.4 (A, 0.3), 119.7 (A, 0.1), 130.7 (A, 1.5), 135.8 (A, 0.2), 145.0 (A, 0.3), 150.4 (A, 1.3), 153.4 (A, 0.1), 174.2 (A, 0.2), 184.1 (A, 3.7), 233.4 (A, 5.0), 264.1 (A, 7.0), 282.1 (A, 34.9), 316.8 (A, 1.5), 374.3 (A, 0.7), 375.0 (A, 3.7), 382.8 (A, 0.4), 392.3 (A, 0.2), 393.4 (A, 6.1), 394.5 (A, 0.5), 396.1 (A, 2.3), 410.1 (A, 5.2), 414.8 (A, 1.2), 414.9 (A, 8.8), 421.7 (A, 21.2), 445.0 (A, 6.1), 448.4 (A, 0.7), 467.3 (A, 5.2), 471.6 (A, 0.9), 474.5 (A, 9.2), 478.1 (A, 3.3), 479.7 (A, 5.3), 480.6 (A, 13.4), 485.1 (A, 0.0), 487.0 (A, 6.0), 497.8 (A, 0.7), 500.7 (A, 0.2), 514.9 (A, 1.2), 519.1 (A, 3.2), 524.8 (A, 1.8), 528.7 (A, 22.2), 550.1 (A, 2.2), 550.4 (A, 7.7), 551.9 (A, 26.7), 552.1 (A, 14.9), 579.0 (A, 107.4), 580.6 (A, 49.5), 599.4 (A, 1.5), 600.0 (A, 113.2), 607.0 (A, 53.8), 613.1 (A, 62.9), 626.7 (A, 207.9), 627.7 (A, 330.4), 642.7 (A, 24.3), 1885.0 (A, 684.4), 1896.5 (A, 87.6), 1943.8 (A, 426.3), 1956.9 (A, 340.8), 1966.9 (A, 123.9), 1982.5 (A, 318.4), 1984.9 (A, 441.4), 1996.7 (A, 177.5), 1999.6 (A, 176.6), 2000.8 (A, 2513.1), 2005.0 (A, 120.1), 2013.7 (A, 2420.4), 2030.2 (A, 1707.6), 2070.8 (A, 379.1) |

**Table S25.** Theoretical harmonic vibrational frequencies (in  $\text{cm}^{-1}$ ) for the structure **14T-2** using the M06-L/TZP and BP86/DZP methods

| M06-L/TZP                                                                                                                                                                                                                                                                                                                                                                                                                                                                                                                                                                                                                                                                                                                                                                                                                                                                                                                                                                                                                                                                                                                                                                                                                                                                                                                                                                                                                                                                                                                          | BP86/DZP                                                                                                                                                                                                                                                                                                                                                                                                                                                                                                                                                                                                                                                                                                                                                                                                                                                                                                                                                                                                                                                                                                                                                                                                                                                                                                                                                                                                                                                                                                                                                                              |
|------------------------------------------------------------------------------------------------------------------------------------------------------------------------------------------------------------------------------------------------------------------------------------------------------------------------------------------------------------------------------------------------------------------------------------------------------------------------------------------------------------------------------------------------------------------------------------------------------------------------------------------------------------------------------------------------------------------------------------------------------------------------------------------------------------------------------------------------------------------------------------------------------------------------------------------------------------------------------------------------------------------------------------------------------------------------------------------------------------------------------------------------------------------------------------------------------------------------------------------------------------------------------------------------------------------------------------------------------------------------------------------------------------------------------------------------------------------------------------------------------------------------------------|---------------------------------------------------------------------------------------------------------------------------------------------------------------------------------------------------------------------------------------------------------------------------------------------------------------------------------------------------------------------------------------------------------------------------------------------------------------------------------------------------------------------------------------------------------------------------------------------------------------------------------------------------------------------------------------------------------------------------------------------------------------------------------------------------------------------------------------------------------------------------------------------------------------------------------------------------------------------------------------------------------------------------------------------------------------------------------------------------------------------------------------------------------------------------------------------------------------------------------------------------------------------------------------------------------------------------------------------------------------------------------------------------------------------------------------------------------------------------------------------------------------------------------------------------------------------------------------|
| 18.1 (A, 0.0), 27.8 (A, 0.3), 35.5 (A, 0.1), 39.1 (A, 0.1), 44.4 (A, 0.1), 51.9 (A, 0.1), 54.9 (A, 0.1), 60.4 (A, 0.1), 66.2 (A, 0.3), 70.3 (A, 0.2), 75.9 (A, 0.1), 77.3 (A, 0.4), 81.1 (A, 0.3), 82.6 (A, 0.3), 85.5 (A, 0.2), 88.0 (A, 0.4), 88.6 (A, 0.2), 90.0 (A, 0.1), 92.5 (A, 0.4), 97.2 (A, 0.0), 98.8 (A, 0.9), 102.9 (A, 0.3), 105.3 (A, 0.3), 109.7 (A, 0.0), 111.9 (A, 0.1), 116.3 (A, 0.1), 119.3 (A, 1.6), 120.8 (A, 0.3), 122.4 (A, 0.4), 128.2 (A, 0.6), 136.9 (A, 0.6), 142.9 (A, 0.3), 153.5 (A, 4.4), 179.2 (A, 0.7), 193.9 (A, 0.5), 210.4 (A, 1.9), 284.7 (A, 1.9), 363.9 (A, 0.5), 375.0 (A, 0.9), 386.7 (A, 5.2), 391.1 (A, 12.3), 393.2 (A, 3.0), 399.1 (A, 4.9), 399.9 (A, 6.3), 404.2 (A, 0.8), 410.0 (A, 18.0), 411.3 (A, 5.3), 422.8 (A, 10.9), 427.3 (A, 5.6), 436.0 (A, 3.1), 440.2 (A, 4.3), 441.8 (A, 1.3), 446.4 (A, 4.0), 470.5 (A, 4.9), 473.0 (A, 7.5), 478.4 (A, 19.1), 482.3 (A, 0.6), 485.6 (A, 8.3), 489.4 (A, 6.2), 493.5 (A, 0.9), 494.0 (A, 3.7), 497.5 (A, 5.2), 507.2 (A, 6.4), 511.4 (A, 4.5), 519.7 (A, 13.0), 540.3 (A, 4.1), 547.1 (A, 28.4), 550.3 (A, 14.3), 555.7 (A, 11.3), 564.3 (A, 27.7), 568.9 (A, 23.3), 594.2 (A, 113.0), 601.1 (A, 176.2), 608.5 (A, 57.9), 616.5 (A, 31.2), 617.9 (A, 152.5), 623.5 (A, 88.0), 632.0 (A, 242.2), 640.7 (A, 88.8), 2012 (A, 128), 2026 (A, 108), 2040 (A, 122), 2043 (A, 94), 2045 (A, 156), 2050 (A, 453), 2053 (A, 466), 2065 (A, 237), 2077 (A, 272), 2084 (A, 534), 2088 (A, 1425), 2098 (A, 2416), 2116 (A, 2809), 2148 (A, 78) | 14.5 (A, 0.0), 20.1 (A, 0.4), 25.7 (A, 0.1), 36.4 (A, 0.1), 36.7 (A, 0.0), 40.3 (A, 0.1), 45.2 (A, 0.7), 50.2 (A, 0.3), 54.6 (A, 0.2), 59.5 (A, 0.4), 68.1 (A, 0.2), 72.1 (A, 0.3), 73.4 (A, 0.5), 76.6 (A, 0.1), 77.8 (A, 0.4), 83.5 (A, 0.1), 85.2 (A, 0.0), 86.3 (A, 0.4), 88.9 (A, 1.4), 89.9 (A, 0.3), 92.6 (A, 0.8), 94.8 (A, 0.6), 96.8 (A, 0.3), 99.2 (A, 0.1), 101.4 (A, 0.0), 105.8 (A, 0.1), 109.0 (A, 0.4), 115.0 (A, 0.2), 118.0 (A, 0.3), 122.6 (A, 0.0), 134.7 (A, 1.3), 156.5 (A, 3.6), 161.3 (A, 0.8), 198.3 (A, 3.3), 200.9 (A, 1.7), 219.2 (A, 3.3), 278.6 (A, 4.8), 333.1 (A, 20.5), 367.0 (A, 5.5), 371.8 (A, 0.6), 378.6 (A, 12.2), 383.6 (A, 22.3), 389.2 (A, 0.7), 391.1 (A, 0.4), 392.5 (A, 10.1), 398.8 (A, 4.1), 402.3 (A, 3.0), 407.9 (A, 0.3), 421.0 (A, 3.8), 433.0 (A, 5.0), 446.2 (A, 7.3), 449.1 (A, 6.3), 466.0 (A, 1.0), 469.9 (A, 17.2), 478.9 (A, 23.1), 480.2 (A, 21.1), 485.5 (A, 1.8), 488.8 (A, 1.9), 494.0 (A, 0.8), 496.0 (A, 3.6), 497.4 (A, 2.5), 503.5 (A, 4.1), 509.1 (A, 0.2), 511.6 (A, 5.6), 514.8 (A, 10.2), 524.7 (A, 4.5), 542.8 (A, 0.6), 553.1 (A, 12.6), 556.4 (A, 25.1), 558.2 (A, 37.5), 577.0 (A, 62.7), 582.6 (A, 15.7), 592.8 (A, 93.0), 595.5 (A, 115.2), 602.0 (A, 87.4), 612.1 (A, 79.8), 616.7 (A, 45.2), 621.9 (A, 321.8), 628.3 (A, 49.2), 1868.8 (A, 412.3), 1949.8 (A, 54.3), 1956.5 (A, 96.6), 1961.0 (A, 198.2), 1962.7 (A, 27.0), 1980.2 (A, 332.7), 1988.5 (A, 513.8), 1990.3 (A, 735.1), 1994.0 (A, 672.9), 2003.9 (A, 25.8), 2004.9 (A, 1183.5), 2016.7 (A, 2325.2), 2035.1 (A, 2519.0), 2065.9 (A, 101.7) |

**Table S26.** Theoretical harmonic vibrational frequencies (in  $\text{cm}^{-1}$ ) for the structure **13S-1** using the M06-L/TZP and BP86/DZP methods

| M06-L/TZP                                                                                                                                                                                                                                                                                                                                                                                                                                                                                                                                                                                                                                                                                                                                                                                                                                                                                                                                                                                                                                                                                                                                                                                                                                                                                                                                                                                                                                                                                                                                            | BP86/DZP                                                                                                                                                                                                                                                                                                                                                                                                                                                                                                                                                                                                                                                                                                                                                                                                                                                                                                                                                                                                                                                                                                                                                                                                                                                                                                                                                                                                                                                                                                                                                                                                |
|------------------------------------------------------------------------------------------------------------------------------------------------------------------------------------------------------------------------------------------------------------------------------------------------------------------------------------------------------------------------------------------------------------------------------------------------------------------------------------------------------------------------------------------------------------------------------------------------------------------------------------------------------------------------------------------------------------------------------------------------------------------------------------------------------------------------------------------------------------------------------------------------------------------------------------------------------------------------------------------------------------------------------------------------------------------------------------------------------------------------------------------------------------------------------------------------------------------------------------------------------------------------------------------------------------------------------------------------------------------------------------------------------------------------------------------------------------------------------------------------------------------------------------------------------|---------------------------------------------------------------------------------------------------------------------------------------------------------------------------------------------------------------------------------------------------------------------------------------------------------------------------------------------------------------------------------------------------------------------------------------------------------------------------------------------------------------------------------------------------------------------------------------------------------------------------------------------------------------------------------------------------------------------------------------------------------------------------------------------------------------------------------------------------------------------------------------------------------------------------------------------------------------------------------------------------------------------------------------------------------------------------------------------------------------------------------------------------------------------------------------------------------------------------------------------------------------------------------------------------------------------------------------------------------------------------------------------------------------------------------------------------------------------------------------------------------------------------------------------------------------------------------------------------------|
| 18.1 (A', 0.2), 32.1 (A'', 0.0), 39.4 (A', 0.0), 45.1 (A'', 0.1), 47.9 (A', 0.0), 49.0 (A'', 0.0), 51.7 (A'', 0.0), 53.3 (A'', 0.0), 73.5 (A', 0.4), 76.1 (A', 0.0), 80.4 (A'', 0.3), 81.3 (A', 0.1), 85.0 (A', 0.0), 86.4 (A'', 0.0), 87.0 (A', 0.3), 92.3 (A', 0.1), 92.3 (A'', 0.0), 97.4 (A'', 0.1), 97.8 (A', 0.2), 99.8 (A'', 0.0), 104.5 (A', 0.0), 112.9 (A', 0.0), 113.1 (A'', 0.1), 119.2 (A', 0.0), 122.6 (A'', 0.4), 132.9 (A', 0.0), 149.5 (A'', 1.5), 158.8 (A', 0.1), 169.7 (A'', 0.0), 177.5 (A', 3.2), 183.5 (A'', 2.1), 205.4 (A', 0.2), 223.8 (A'', 8.7), 246.2 (A', 0.9), 260.5 (A', 5.4), 351.7 (A'', 24.0), 389.9 (A', 0.6), 393.5 (A'', 0.0), 396.6 (A', 0.0), 418.5 (A'', 0.2), 419.2 (A'', 0.0), 426.9 (A', 0.6), 430.5 (A'', 0.0), 432.5 (A', 1.0), 435.3 (A'', 13.9), 443.1 (A', 4.8), 457.4 (A'', 0.2), 462.4 (A', 0.4), 468.7 (A'', 16.4), 479.8 (A'', 0.0), 481.3 (A', 4.4), 487.0 (A', 0.6), 488.2 (A', 5.1), 495.1 (A', 0.5), 495.9 (A'', 1.0), 499.7 (A', 1.8), 507.3 (A'', 22.8), 510.0 (A', 3.6), 513.3 (A'', 0.6), 519.1 (A', 4.7), 525.5 (A'', 0.0), 555.6 (A', 0.0), 569.4 (A', 1.5), 573.5 (A'', 0.3), 579.0 (A', 84.5), 586.4 (A'', 0.0), 586.6 (A', 72.4), 589.5 (A', 59.9), 595.4 (A'', 77.7), 619.7 (A'', 5.0), 630.3 (A', 57.1), 633.6 (A'', 277.1), 634.0 (A', 298.2), 653.7 (A', 4.4), 1954 (A', 347), 2033 (A'', 13), 2037 (A', 107), 2048 (A', 25), 2054 (A'', 1), 2062 (A', 174), 2064 (A'', 160), 2071 (A'', 3), 2072 (A', 21), 2086 (A', 1817), 2097 (A'', 2746), 2109 (A', 3362), 2148 (A', 118) | 24.2 (A', 0.0), 29.5 (A'', 0.0), 44.7 (A'', 0.1), 45.2 (A'', 0.0), 47.4 (A', 0.0), 48.5 (A', 0.2), 52.8 (A'', 0.1), 66.0 (A'', 0.0), 77.6 (A', 0.1), 81.3 (A', 0.1), 83.9 (A'', 0.3), 84.9 (A', 0.1), 86.8 (A'', 0.0), 87.2 (A', 0.1), 89.6 (A', 0.2), 91.0 (A'', 0.0), 94.9 (A', 0.0), 98.9 (A', 0.2), 101.1 (A'', 0.1), 102.4 (A'', 0.0), 104.7 (A', 0.0), 104.8 (A', 0.0), 105.8 (A'', 0.0), 114.8 (A'', 0.2), 118.1 (A', 0.1), 131.1 (A', 0.1), 137.9 (A'', 0.4), 157.5 (A', 0.4), 158.6 (A'', 0.0), 160.6 (A', 3.6), 189.4 (A'', 0.1), 204.5 (A', 0.1), 239.0 (A'', 6.1), 257.4 (A', 0.1), 274.4 (A', 1.3), 370.6 (A'', 19.1), 382.8 (A'', 0.0), 384.0 (A', 0.1), 404.1 (A', 0.3), 404.2 (A'', 0.0), 404.2 (A'', 0.0), 417.0 (A', 2.0), 421.1 (A'', 0.0), 427.9 (A', 1.7), 428.8 (A', 1.7), 430.3 (A'', 9.1), 443.1 (A', 1.1), 445.5 (A'', 0.0), 461.6 (A'', 29.5), 484.5 (A'', 0.0), 490.6 (A', 3.3), 497.1 (A', 7.9), 505.4 (A', 0.1), 506.7 (A'', 1.8), 508.8 (A', 6.8), 509.2 (A', 1.6), 515.5 (A'', 1.2), 516.0 (A', 0.1), 524.7 (A'', 9.3), 526.6 (A', 1.7), 530.7 (A'', 0.0), 550.4 (A', 2.1), 570.8 (A'', 0.0), 576.0 (A', 0.6), 583.1 (A', 68.9), 584.8 (A', 63.4), 585.9 (A'', 0.0), 589.1 (A'', 49.5), 591.0 (A', 74.0), 614.8 (A'', 102.7), 625.5 (A', 49.0), 626.1 (A'', 197.5), 629.5 (A', 230.8), 637.2 (A', 0.1), 1873.5 (A', 324.1), 1961.8 (A'', 24.5), 1966.3 (A', 10.8), 1968.7 (A', 29.1), 1972.4 (A'', 0.0), 1983.8 (A'', 325.0), 1984.6 (A', 606.1), 1990.4 (A'', 0.0), 1991.4 (A', 0.4), 2008.1 (A', 1408.0), 2019.4 (A'', 2416.1), 2028.1 (A', 2995.0), 2063.8 (A', 99.2) |

**Table S27.** Theoretical harmonic vibrational frequencies (in  $\text{cm}^{-1}$ ) for the structure **13T-1** using the M06-L/TZP and BP86/DZP methods

| M06-L/TZP                                                                                                                                                                                                                                                                                                                                                                                                                                                                                                                                                                                                                                                                                                                                                                                                                                                                                                                                                                                                                                                                                                                                                                                                                                                                                                                                                                                                                 | BP86/DZP                                                                                                                                                                                                                                                                                                                                                                                                                                                                                                                                                                                                                                                                                                                                                                                                                                                                                                                                                                                                                                                                                                                                                                                                                                                                                                                                                                                                                                                              |
|---------------------------------------------------------------------------------------------------------------------------------------------------------------------------------------------------------------------------------------------------------------------------------------------------------------------------------------------------------------------------------------------------------------------------------------------------------------------------------------------------------------------------------------------------------------------------------------------------------------------------------------------------------------------------------------------------------------------------------------------------------------------------------------------------------------------------------------------------------------------------------------------------------------------------------------------------------------------------------------------------------------------------------------------------------------------------------------------------------------------------------------------------------------------------------------------------------------------------------------------------------------------------------------------------------------------------------------------------------------------------------------------------------------------------|-----------------------------------------------------------------------------------------------------------------------------------------------------------------------------------------------------------------------------------------------------------------------------------------------------------------------------------------------------------------------------------------------------------------------------------------------------------------------------------------------------------------------------------------------------------------------------------------------------------------------------------------------------------------------------------------------------------------------------------------------------------------------------------------------------------------------------------------------------------------------------------------------------------------------------------------------------------------------------------------------------------------------------------------------------------------------------------------------------------------------------------------------------------------------------------------------------------------------------------------------------------------------------------------------------------------------------------------------------------------------------------------------------------------------------------------------------------------------|
| 20.8 (A, 0.0), 26.0 (A, 0.0), 31.0 (A, 0.0), 41.5 (A, 0.0), 45.6 (A, 0.2), 48.5 (A, 0.0), 49.8 (A, 0.1), 57.7 (A, 0.2), 63.4 (A, 0.0), 69.2 (A, 0.1), 76.2 (A, 0.2), 77.2 (A, 0.2), 80.8 (A, 0.1), 82.1 (A, 0.1), 84.4 (A, 0.2), 86.4 (A, 0.2), 88.8 (A, 0.2), 90.3 (A, 0.1), 94.4 (A, 0.0), 98.0 (A, 0.0), 100.6 (A, 0.1), 103.4 (A, 0.0), 107.5 (A, 0.0), 111.3 (A, 0.1), 112.3 (A, 0.1), 125.4 (A, 0.0), 138.3 (A, 0.2), 150.1 (A, 0.3), 154.3 (A, 0.2), 157.4 (A, 0.5), 180.5 (A, 0.2), 188.5 (A, 0.2), 232.5 (A, 0.7), 243.7 (A, 1.3), 250.0 (A, 1.7), 362.3 (A, 1.0), 375.4 (A, 6.6), 387.0 (A, 0.7), 388.4 (A, 0.4), 397.5 (A, 2.6), 399.3 (A, 2.0), 404.0 (A, 0.9), 408.8 (A, 3.7), 416.1 (A, 7.2), 424.5 (A, 7.2), 425.1 (A, 0.9), 431.9 (A, 3.2), 436.6 (A, 0.8), 444.0 (A, 2.1), 452.2 (A, 1.0), 456.9 (A, 11.2), 466.9 (A, 8.0), 477.8 (A, 0.6), 479.4 (A, 3.8), 481.8 (A, 6.9), 487.8 (A, 1.4), 488.1 (A, 1.2), 488.6 (A, 1.2), 494.1 (A, 4.1), 499.8 (A, 1.8), 513.1 (A, 0.2), 533.3 (A, 17.6), 535.4 (A, 7.7), 559.1 (A, 27.1), 565.8 (A, 34.3), 571.7 (A, 5.3), 578.0 (A, 51.0), 582.2 (A, 30.2), 585.5 (A, 29.2), 590.6 (A, 75.4), 606.6 (A, 73.1), 619.7 (A, 176.6), 625.4 (A, 242.7), 637.9 (A, 45.1), 1935 (A, 411), 2025 (A, 11), 2031 (A, 30), 2046 (A, 19), 2048 (A, 96), 2058 (A, 611), 2059 (A, 568), 2069 (A, 397), 2073 (A, 10), 2084 (A, 1442), 2097 (A, 2310), 2101 (A, 3324), 2145 (A, 187) | 6.6 (A, 0.0), 19.7 (A, 0.6), 25.3 (A, 0.1), 28.6 (A, 0.1), 32.5 (A, 0.0), 41.8 (A, 0.1), 43.5 (A, 0.5), 45.5 (A, 0.0), 50.9 (A, 1.0), 62.9 (A, 0.0), 66.1 (A, 0.1), 74.0 (A, 0.3), 77.7 (A, 0.1), 81.2 (A, 0.0), 84.7 (A, 0.0), 86.4 (A, 0.4), 87.2 (A, 0.0), 88.8 (A, 0.3), 92.2 (A, 0.0), 95.1 (A, 0.1), 97.2 (A, 0.1), 97.3 (A, 0.0), 103.0 (A, 0.0), 105.9 (A, 0.6), 108.1 (A, 0.0), 116.3 (A, 0.1), 131.3 (A, 0.3), 138.3 (A, 0.0), 147.7 (A, 0.1), 153.1 (A, 0.5), 178.9 (A, 0.0), 190.5 (A, 0.2), 245.7 (A, 0.3), 254.9 (A, 0.8), 263.4 (A, 0.0), 363.8 (A, 0.0), 367.4 (A, 0.0), 372.6 (A, 2.9), 374.5 (A, 0.0), 393.3 (A, 1.1), 395.2 (A, 0.0), 398.0 (A, 0.8), 410.7 (A, 0.2), 413.9 (A, 0.0), 415.3 (A, 2.1), 421.4 (A, 1.9), 432.7 (A, 0.0), 439.0 (A, 0.0), 450.4 (A, 1.3), 454.4 (A, 2.9), 477.4 (A, 20.3), 486.1 (A, 0.5), 492.6 (A, 10.3), 493.3 (A, 0.6), 495.8 (A, 0.2), 496.0 (A, 3.9), 497.3 (A, 0.0), 497.4 (A, 1.3), 502.4 (A, 0.6), 504.4 (A, 3.4), 516.7 (A, 0.7), 517.5 (A, 0.0), 562.3 (A, 1.3), 563.8 (A, 0.0), 565.4 (A, 20.6), 568.1 (A, 22.7), 571.3 (A, 0.0), 578.6 (A, 96.7), 582.9 (A, 9.5), 593.8 (A, 135.7), 606.7 (A, 254.5), 607.2 (A, 27.8), 628.4 (A, 28.3), 633.6 (A, 200.1), 1857.7 (A, 406.6), 1950.6 (A, 22.6), 1958.3 (A, 0.7), 1963.6 (A, 2.5), 1964.7 (A, 0.0), 1977.3 (A, 844.2), 1977.8 (A, 1066.2), 1990.0 (A, 71.2), 1994.3 (A, 0.0), 2007.9 (A, 1053.1), 2019.8 (A, 1872.2), 2020.0 (A, 3113.6), 2059.9 (A, 209.2) |

**Table S28.** Theoretical harmonic vibrational frequencies (in  $\text{cm}^{-1}$ ) for the structure **12S-1** using the M06-L/TZP and BP86/DZP methods

| M06-L/TZP                                                                                                                                                                                                                                                                                                                                                                                                                                                                                                                                                                                                                                                                                                                                                                                                                                                                                                                                                                                                                                                                                                                                                                                                                                                                                                               | BP86/DZP                                                                                                                                                                                                                                                                                                                                                                                                                                                                                                                                                                                                                                                                                                                                                                                                                                                                                                                                                                                                                                                                                                                                                                                                                                                                                                                                                              |
|-------------------------------------------------------------------------------------------------------------------------------------------------------------------------------------------------------------------------------------------------------------------------------------------------------------------------------------------------------------------------------------------------------------------------------------------------------------------------------------------------------------------------------------------------------------------------------------------------------------------------------------------------------------------------------------------------------------------------------------------------------------------------------------------------------------------------------------------------------------------------------------------------------------------------------------------------------------------------------------------------------------------------------------------------------------------------------------------------------------------------------------------------------------------------------------------------------------------------------------------------------------------------------------------------------------------------|-----------------------------------------------------------------------------------------------------------------------------------------------------------------------------------------------------------------------------------------------------------------------------------------------------------------------------------------------------------------------------------------------------------------------------------------------------------------------------------------------------------------------------------------------------------------------------------------------------------------------------------------------------------------------------------------------------------------------------------------------------------------------------------------------------------------------------------------------------------------------------------------------------------------------------------------------------------------------------------------------------------------------------------------------------------------------------------------------------------------------------------------------------------------------------------------------------------------------------------------------------------------------------------------------------------------------------------------------------------------------|
| 26.0 (A, 0.1), 26.8 (A, 0.0), 39.8 (A, 0.0), 40.8 (A, 0.1), 43.1 (A, 0.0), 53.8 (A, 0.0), 60.2 (A, 0.1), 61.4 (A, 0.1), 75.4 (A, 0.1), 76.6 (A, 0.0), 78.9 (A, 0.1), 82.2 (A, 0.3), 87.6 (A, 0.0), 89.3 (A, 0.1), 91.3 (A, 0.0), 95.7 (A, 0.0), 96.3 (A, 0.2), 99.7 (A, 0.0), 100.4 (A, 0.2), 108.5 (A, 0.1), 109.4 (A, 0.6), 114.1 (A, 0.2), 124.6 (A, 0.7), 127.0 (A, 0.0), 140.1 (A, 0.0), 148.0 (A, 0.3), 154.9 (A, 3.8), 157.1 (A, 0.1), 162.1 (A, 0.0), 197.2 (A, 0.3), 203.9 (A, 0.8), 251.8 (A, 3.7), 264.6 (A, 4.6), 363.0 (A, 0.4), 382.6 (A, 8.6), 397.7 (A, 2.7), 406.1 (A, 0.5), 407.4 (A, 0.1), 411.0 (A, 1.0), 413.6 (A, 5.7), 419.2 (A, 2.9), 421.0 (A, 0.2), 435.1 (A, 4.9), 437.1 (A, 0.1), 444.9 (A, 1.4), 479.3 (A, 4.3), 483.8 (A, 3.7), 485.7 (A, 3.1), 488.3 (A, 0.0), 490.4 (A, 2.4), 497.4 (A, 1.1), 500.5 (A, 1.1), 507.9 (A, 1.0), 514.7 (A, 3.9), 524.8 (A, 1.9), 536.5 (A, 1.6), 544.3 (A, 30.3), 546.6 (A, 3.3), 548.2 (A, 46.3), 561.4 (A, 11.8), 563.7 (A, 28.9), 595.3 (A, 0.9), 596.1 (A, 84.3), 602.3 (A, 9.5), 609.4 (A, 1.4), 624.5 (A, 73.7), 630.3 (A, 329.7), 632.5 (A, 121.5), 640.1 (A, 1.3), 1993 (A, 78), 1994 (A, 308), 2022 (A, 23), 2040 (A, 213), 2047 (A, 53), 2053 (A, 409), 2074 (A, 69), 2080 (A, 778), 2083 (A, 679), 2087 (A, 3067), 2111 (A, 3212), 2142 (A, 66) | 21.9 (A, 0.0), 29.3 (B, 0.1), 33.9 (A, 0.0), 35.3 (B, 0.1), 42.2 (B, 0.1), 45.7 (A, 0.0), 51.0 (B, 0.0), 54.5 (A, 0.1), 66.8 (B, 0.2), 69.1 (A, 0.1), 72.2 (A, 0.1), 80.9 (A, 0.2), 81.6 (B, 0.2), 87.2 (A, 0.0), 87.4 (A, 0.0), 88.1 (B, 0.1), 93.3 (A, 0.1), 93.4 (B, 0.4), 94.2 (B, 0.1), 104.4 (A, 0.0), 104.7 (B, 0.2), 109.7 (B, 1.0), 118.0 (B, 1.2), 124.1 (A, 0.0), 129.8 (B, 0.0), 137.5 (A, 0.9), 138.5 (B, 3.9), 144.4 (A, 0.0), 150.0 (A, 0.0), 195.7 (A, 0.1), 211.7 (B, 0.4), 264.4 (A, 1.4), 270.7 (B, 1.7), 349.5 (A, 0.4), 368.5 (B, 9.1), 384.8 (B, 3.3), 394.0 (A, 0.1), 396.0 (B, 0.5), 397.1 (A, 1.1), 400.0 (B, 0.8), 406.8 (B, 3.6), 407.0 (A, 0.0), 420.3 (B, 1.3), 423.9 (A, 0.4), 429.7 (A, 2.2), 473.0 (A, 0.3), 486.1 (B, 0.0), 492.6 (B, 2.6), 497.5 (A, 0.1), 498.1 (B, 0.2), 503.6 (A, 5.1), 505.1 (B, 3.7), 509.7 (A, 6.8), 516.0 (A, 2.4), 522.2 (B, 1.3), 532.2 (A, 44.8), 536.7 (B, 5.0), 554.2 (A, 0.0), 559.8 (B, 1.2), 569.4 (B, 23.1), 571.9 (A, 29.3), 594.7 (A, 1.1), 595.9 (B, 12.3), 598.5 (B, 38.8), 604.0 (A, 3.2), 616.3 (B, 284.1), 618.2 (A, 51.3), 624.6 (B, 116.8), 625.6 (A, 0.0), 1918.1 (A, 89.4), 1919.5 (B, 218.1), 1947.4 (B, 36.2), 1958.7 (A, 279.5), 1973.8 (B, 5.6), 1979.5 (A, 95.4), 1991.5 (B, 11.9), 1995.8 (A, 322.0), 1999.3 (A, 1263.0), 2003.4 (B, 2969.4), 2029.9 (B, 2916.6), 2057.4 (A, 21.9) |

**Table S29.** Theoretical harmonic vibrational frequencies (in  $\text{cm}^{-1}$ ) for the structure **12S-2** using the M06-L/TZP and BP86/DZP methods

| M06-L/TZP                                                                                                                                                                                                                                                                                                                                                                                                                                                                                                                                                                                                                                                                                                                                                                                                                                                                                                                                                                                                                                                                                                                                                                                                                                                                                                                          | BP86/DZP |
|------------------------------------------------------------------------------------------------------------------------------------------------------------------------------------------------------------------------------------------------------------------------------------------------------------------------------------------------------------------------------------------------------------------------------------------------------------------------------------------------------------------------------------------------------------------------------------------------------------------------------------------------------------------------------------------------------------------------------------------------------------------------------------------------------------------------------------------------------------------------------------------------------------------------------------------------------------------------------------------------------------------------------------------------------------------------------------------------------------------------------------------------------------------------------------------------------------------------------------------------------------------------------------------------------------------------------------|----------|
| 24.2 (A, 0.0), 29.0 (A, 0.2), 39.9 (A, 0.3), 44.8 (A, 0.1), 52.8 (A, 0.1), 58.0 (A, 0.8), 63.9 (A, 0.0), 66.1 (A, 0.4), 71.1 (A, 0.6), 75.1 (A, 0.3), 80.0 (A, 0.1), 83.7 (A, 0.1), 85.3 (A, 0.0), 89.6 (A, 0.2), 95.8 (A, 0.4), 97.2 (A, 0.1), 99.7 (A, 0.4), 100.9 (A, 0.1), 103.7 (A, 0.3), 106.9 (A, 0.2), 109.6 (A, 0.3), 112.1 (A, 0.4), 119.9 (A, 2.3), 122.8 (A, 0.8), 127.6 (A, 0.0), 146.8 (A, 0.8), 160.2 (A, 0.6), 166.5 (A, 2.3), 174.8 (A, 1.8), 190.3 (A, 2.2), 192.7 (A, 1.7), 246.3 (A, 1.5), 271.9 (A, 2.4), 341.4 (A, 8.9), 360.8 (A, 5.5), 400.8 (A, 0.4), 406.3 (A, 1.5), 411.6 (A, 5.8), 414.1 (A, 0.7), 421.0 (A, 1.4), 426.5 (A, 1.3), 429.6 (A, 2.5), 439.9 (A, 2.9), 440.7 (A, 5.6), 450.0 (A, 5.4), 469.0 (A, 1.2), 473.3 (A, 7.8), 479.6 (A, 1.5), 486.0 (A, 1.0), 487.7 (A, 2.9), 491.7 (A, 8.1), 497.0 (A, 10.1), 511.9 (A, 6.3), 516.6 (A, 3.4), 531.4 (A, 1.3), 534.5 (A, 30.2), 538.6 (A, 14.4), 544.1 (A, 17.6), 554.3 (A, 9.8), 565.2 (A, 16.6), 582.0 (A, 38.3), 585.0 (A, 61.2), 592.4 (A, 5.0), 598.2 (A, 36.3), 599.4 (A, 42.1), 622.4 (A, 125.0), 630.9 (A, 164.9), 635.6 (A, 122.6), 647.2 (A, 26.1), 1946 (A, 268), 1968 (A, 386), 2023 (A, 41), 2030 (A, 190), 2041 (A, 149), 2053 (A, 149), 2066 (A, 491), 2081 (A, 258), 2083 (A, 1560), 2093 (A, 2022), 2108 (A, 3174), 2140 (A, 91) |          |

**Table S30.** Theoretical harmonic vibrational frequencies (in  $\text{cm}^{-1}$ ) for the structure **12T-1** using the M06-L/TZP and BP86/DZP methods

| M06-L/TZP                                                                                                                                                                                                                                                                                                                                                                                                                                                                                                                                                                                                                                                                                                                                                                                                                                                                                                                                                                                                                                          | BP86/DZP                                                                                                                                                                                                                                                                                                                                                                                                                                                                                                                                                                                                                                                                                                                                                                                                                                                                                                                                                                                                                                                                                                                                                                                                       |
|----------------------------------------------------------------------------------------------------------------------------------------------------------------------------------------------------------------------------------------------------------------------------------------------------------------------------------------------------------------------------------------------------------------------------------------------------------------------------------------------------------------------------------------------------------------------------------------------------------------------------------------------------------------------------------------------------------------------------------------------------------------------------------------------------------------------------------------------------------------------------------------------------------------------------------------------------------------------------------------------------------------------------------------------------|----------------------------------------------------------------------------------------------------------------------------------------------------------------------------------------------------------------------------------------------------------------------------------------------------------------------------------------------------------------------------------------------------------------------------------------------------------------------------------------------------------------------------------------------------------------------------------------------------------------------------------------------------------------------------------------------------------------------------------------------------------------------------------------------------------------------------------------------------------------------------------------------------------------------------------------------------------------------------------------------------------------------------------------------------------------------------------------------------------------------------------------------------------------------------------------------------------------|
| 28 (A, 0), 36 (A, 0), 37 (A, 0), 44 (A, 0), 54 (A, 0), 56 (A, 1), 59 (A, 0), 66 (A, 2), 73 (A, 0), 75 (A, 1), 82 (A, 0), 87 (A, 0), 89 (A, 0), 95 (A, 0), 95 (A, 1), 98 (A, 0), 100 (A, 0), 104 (A, 0), 105 (A, 0), 108 (A, 1), 114 (A, 0), 118 (A, 0), 125 (A, 0), 133 (A, 0), 135 (A, 0), 152 (A, 1), 155 (A, 1), 167 (A, 1), 175 (A, 0), 188 (A, 0), 206 (A, 0), 229 (A, 1), 240 (A, 1), 308 (A, 27), 324 (A, 12), 362 (A, 5), 374 (A, 4), 380 (A, 9), 385 (A, 29), 392 (A, 1), 400 (A, 2), 408 (A, 3), 411 (A, 4), 430 (A, 2), 436 (A, 20), 445 (A, 9), 454 (A, 1), 459 (A, 5), 467 (A, 4), 476 (A, 6), 484 (A, 18), 485 (A, 6), 489 (A, 4), 496 (A, 6), 499 (A, 15), 504 (A, 20), 514 (A, 1), 521 (A, 34), 539 (A, 6), 541 (A, 26), 548 (A, 31), 555 (A, 19), 559 (A, 8), 567 (A, 30), 594 (A, 140), 596 (A, 114), 611 (A, 57), 618 (A, 95), 638 (A, 67), 1948 (A, 398), 1975 (A, 390), 1991 (A, 190), 2023 (A, 307), 2031 (A, 114), 2043 (A, 85), 2053 (A, 850), 2065 (A, 622), 2075 (A, 717), 2083 (A, 1995), 2098 (A, 3438), 2132 (A, 106) | 17.2 (A, 0), 25.2 (A, 0), 30.0 (A, 0), 41.5 (A, 0), 48.6 (A, 0), 49.3 (A, 0), 61.0 (A, 0), 66.6 (A, 1), 67.8 (A, 0), 76.4 (A, 0), 78.6 (A, 0), 83.6 (A, 0), 87.2 (A, 0), 90.4 (A, 0), 91.9 (A, 0), 93.4 (A, 0), 99.0 (A, 0), 100.5 (A, 0), 102.7 (A, 0), 104.0 (A, 0), 110.9 (A, 0), 118.7 (A, 0), 122.9 (A, 0), 125.0 (A, 0), 129.9 (A, 2), 138.5 (A, 0), 155.6 (A, 0), 165.5 (A, 1), 172.3 (A, 0), 183.1 (A, 0), 208.0 (A, 0), 235.8 (A, 1), 241.1 (A, 2), 304.4 (A, 9), 317.2 (A, 6), 355.0 (A, 1), 360.5 (A, 4), 366.9 (A, 0), 384.1 (A, 2), 390.1 (A, 3), 393.4 (A, 2), 394.8 (A, 5), 408.4 (A, 3), 425.1 (A, 0), 436.8 (A, 1), 448.4 (A, 5), 461.8 (A, 2), 469.9 (A, 1), 476.2 (A, 10), 478.2 (A, 6), 490.3 (A, 2), 494.4 (A, 3), 497.1 (A, 5), 502.8 (A, 3), 506.9 (A, 8), 509.9 (A, 5), 516.3 (A, 2), 524.0 (A, 23), 540.4 (A, 18), 548.0 (A, 10), 549.6 (A, 29), 561.0 (A, 40), 562.4 (A, 5), 564.9 (A, 25), 585.5 (A, 116), 596.3 (A, 59), 601.4 (A, 81), 612.8 (A, 145), 620.7 (A, 3), 1840.6 (A, 454), 1867.3 (A, 196), 1923.5 (A, 127), 1948.5 (A, 396), 1958.6 (A, 11), 1963.2 (A, 120), 1976.0 (A, 261), 1979.9 (A, 1093), 1991.0 (A, 550), 2003.8 (A, 1969), 2011.6 (A, 3094), 2045.1 (A, 142) |

**Table S31.** Metal- Metal Distances, Natural Population Analysis Natural Charges, Metal Electron Configuration, Formal Metal-Metal Bond Orders, and WBIs for the  $\text{SnFe}_4(\text{CO})_n$  ( $n = 16$  to  $12$ ) Structures Using the M06-L/TZP and BP86/DZP Methods.

|                              |         | <b>16S-1</b> |       | <b>16S-2</b> |       | <b>15S-1</b> |       | <b>15S-2</b> |       |
|------------------------------|---------|--------------|-------|--------------|-------|--------------|-------|--------------|-------|
|                              |         | M06-X        | BP86  | M06-X        | BP86  | M06-X        | BP86  | M06-X        | BP86  |
| Metal-metal distanc          | Fe1-Fe2 | 2.872        | 2.898 | 2.876        | 2.903 | 2.917        | 3.005 | 2.431        | 2.456 |
|                              | Fe3-Fe4 | 2.872        | 2.898 | 2.601        | 2.600 | 2.917        | 3.005 | 2.847        | 2.863 |
|                              | Fe1-Fe3 | /            | /     | /            | /     | /            | /     | /            | /     |
|                              | Fe1-Fe4 | /            | /     | /            | /     | /            | /     | /            | /     |
|                              | Fe2-Fe3 | /            | /     | /            | /     | 2.747        | 2.755 | /            | /     |
|                              | Fe2-Fe4 | /            | /     | /            | /     | /            | /     | /            | /     |
|                              | Sn- Fe1 | 2.520        | 2.508 | 2.509        | 2.485 | 2.442        | 2.422 | 2.476        | 2.456 |
|                              | Sn- Fe2 | 2.520        | 2.508 | 2.509        | 2.485 | 2.543        | 2.494 | /            | /     |
| Metal natural charge         | Sn- Fe3 | 2.520        | 2.508 | 2.530        | 2.522 | 2.543        | 2.494 | 2.502        | 2.475 |
|                              | Sn- Fe4 | 2.520        | 2.508 | 2.530        | 2.522 | 2.442        | 2.422 | 2.482        | 2.472 |
|                              | Fe1     | -0.91        | -1.48 | -0.93        | -1.50 | -0.96        | -1.59 | -0.69        | -1.23 |
|                              | Fe2     | -0.91        | -1.48 | -0.93        | -1.50 | -0.78        | -1.23 | -0.69        | -1.05 |
|                              | Fe3     | -0.91        | -1.48 | -1.01        | -1.53 | -0.78        | -1.23 | -0.96        | -1.54 |
| Metal electron configuration | Fe4     | -0.91        | -1.48 | -1.01        | -1.53 | -0.96        | -1.59 | -0.95        | -1.55 |
|                              | Sn      | 0.41         | 1.10  | 0.52         | 1.22  | 0.7          | 1.40  | 0.86         | 1.45  |
|                              | Fe1     | 18           | 18    | 18           | 18    | 18           | 18    | 18           | 18    |
|                              | Fe2     | 18           | 18    | 18           | 18    | 18           | 18    | 18           | 18    |
|                              | Fe3     | 18           | 18    | 18           | 18    | 18           | 18    | 18           | 18    |
| Formal bond order            | Fe4     | 18           | 18    | 18           | 18    | 18           | 18    | 18           | 18    |
|                              | Fe1-Fe2 | 1            | 1     | 1            | 1     | 1            | 1     | 2            | 2     |
|                              | Fe3-Fe4 | 1            | 1     | 1            | 1     | 1            | 1     | 1            | 1     |
|                              | Fe1-Fe3 | /            | /     | /            | /     | /            | /     | /            | /     |
|                              | Fe1-Fe4 | /            | /     | /            | /     | /            | /     | /            | /     |
|                              | Fe2-Fe3 | /            | /     | /            | /     | 1            | 1     | /            | /     |
|                              | Fe2-Fe4 | /            | /     | /            | /     | /            | /     | /            | /     |
|                              | Sn- Fe1 | 1            | 1     | 1            | 1     | 1            | 1     | 2            | 2     |
| Wiberg bond index            | Sn- Fe2 | 1            | 1     | 1            | 1     | 1            | 1     | /            | /     |
|                              | Sn- Fe3 | 1            | 1     | 1            | 1     | 1            | 1     | 1            | 1     |
|                              | Sn- Fe4 | 1            | 1     | 1            | 1     | 1            | 1     | 1            | 1     |
|                              | Fe1-Fe2 | 0.19         | 0.40  | 0.18         | 0.39  | 0.14         | 0.31  | 0.37         | 0.62  |
|                              | Fe3-Fe4 | 0.19         | 0.40  | 0.14         | 0.32  | 0.14         | 0.31  | 0.19         | 0.40  |
|                              | Fe1-Fe3 | 0.03         | 0.04  | 0.03         | 0.05  | 0.05         | 0.10  | 0.04         | 0.08  |
|                              | Fe1-Fe4 | 0.03         | 0.04  | 0.03         | 0.05  | 0.07         | 0.09  | 0.06         | 0.08  |
|                              | Fe2-Fe3 | 0.03         | 0.04  | 0.03         | 0.05  | 0.19         | 0.40  | 0.01         | 0.01  |
| Fe2-Fe4                      | 0.03    | 0.04         | 0.03  | 0.05         | 0.05  | 0.10         | 0.01  | 0.01         |       |
|                              | Sn- Fe1 | 0.37         | 0.56  | 0.40         | 0.59  | 0.44         | 0.64  | 0.39         | 0.65  |
|                              | Sn- Fe2 | 0.37         | 0.56  | 0.40         | 0.59  | 0.31         | 0.44  | 0.03         | 0.03  |
|                              | Sn- Fe3 | 0.37         | 0.56  | 0.37         | 0.53  | 0.31         | 0.44  | 0.39         | 0.56  |
|                              | Sn- Fe4 | 0.37         | 0.56  | 0.37         | 0.53  | 0.44         | 0.64  | 0.43         | 0.58  |

Values for global minimum structures are shown in bold type.



**Table S32.** Metal- Metal Distances, Natural Population Analysis Natural Charges, Metal Electron Configuration, Formal Metal-Metal Bond Orders, and WBIs for the  $\text{SnFe}_4(\text{CO})_n$  ( $n = 16$  to  $12$ ) Structures Using the M06-L/TZP and BP86/DZP Methods.

|                              |         | <b>15T-1</b> |       | <b>14S-1</b> |       | <b>14S-2</b> |       |
|------------------------------|---------|--------------|-------|--------------|-------|--------------|-------|
|                              |         | M06-X        | BP86  | M06-X        | BP86  | M06-X        | BP86  |
| Metal-metal distanc          | Fe1-Fe2 | 2.490        | 2.451 | 2.973        | 3.056 | 2.817        | 2.830 |
|                              | Fe3-Fe4 | 2.824        | 2.853 | 2.691        | 2.673 | 2.352        | 2.341 |
|                              | Fe1-Fe3 | /            | /     | /            | /     | /            | /     |
|                              | Fe1-Fe4 | /            | /     | /            | /     | /            | /     |
|                              | Fe2-Fe3 | /            | /     | 2.805        | 2.840 | /            | /     |
|                              | Fe2-Fe4 | /            | /     | 2.806        | 2.816 | /            | /     |
|                              | Sn- Fe1 | 2.410        | 2.358 | 2.455        | 2.415 | 2.498        | 2.481 |
|                              | Sn- Fe2 | /            | /     | 2.576        | 2.488 | 2.490        | 2.481 |
|                              | Sn- Fe3 | 2.505        | 2.471 | 2.495        | 2.438 | 2.496        | 2.465 |
|                              | Sn- Fe4 | 2.495        | 2.473 | 2.443        | 2.424 | 2.491        | 2.465 |
| Metal natural charge         | Fe1     | -0.53        | -1.19 | -0.92        | -1.56 | -0.92        | -1.50 |
|                              | Fe2     | -0.53        | -1.02 | -0.56        | -1.00 | -0.92        | -1.50 |
|                              | Fe3     | -0.95        | -1.54 | -0.83        | -1.30 | -0.61        | -1.07 |
|                              | Fe4     | -0.95        | -1.54 | -0.72        | -1.30 | -0.63        | -1.07 |
|                              | Sn      | 0.67         | 1.32  | 0.53         | 1.23  | 0.53         | 1.28  |
| Metal electron configuration | Fe1     | 18           | 18    | 18           | 18    | 18           | 18    |
|                              | Fe2     | 18           | 18    | 18           | 18    | 18           | 18    |
|                              | Fe3     | 18           | 18    | 18           | 18    | 18           | 18    |
|                              | Fe4     | 18           | 18    | 18           | 18    | 18           | 18    |
| Formal bond order            | Fe1-Fe2 | 2            | 2     | 1            | 1     | 1            | 1     |
|                              | Fe3-Fe4 | 1            | 1     | 1            | 1     | 3            | 3     |
|                              | Fe1-Fe3 | /            | /     | /            | /     | /            | /     |
|                              | Fe1-Fe4 | /            | /     | /            | /     | /            | /     |
|                              | Fe2-Fe3 | /            | /     | 1            | 1     | /            | /     |
|                              | Fe2-Fe4 | /            | /     | 1            | 1     | /            | /     |
|                              | Sn- Fe1 | 2            | 2     | 1            | 1     | 1            | 1     |
|                              | Sn- Fe2 | /            | /     | 1            | 1     | 1            | 1     |
|                              | Sn- Fe3 | 1            | 1     | 1            | 1     | 1            | 1     |
|                              | Sn- Fe4 | 1            | 1     | 1            | 1     | 1            | 1     |
| Wiberg bond index            | Fe1-Fe2 | 0.21         | 0.44  | 0.20         | 0.39  | 0.19         | 0.39  |
|                              | Fe3-Fe4 | 0.19         | 0.40  | 0.15         | 0.34  | 0.32         | 0.69  |
|                              | Fe1-Fe3 | 0.05         | 0.09  | 0.04         | 0.08  | 0.03         | 0.05  |
|                              | Fe1-Fe4 | 0.05         | 0.08  | 0.08         | 0.10  | 0.08         | 0.13  |
|                              | Fe2-Fe3 | 0.00         | 0.00  | 0.21         | 0.44  | 0.07         | 0.13  |
|                              | Fe2-Fe4 | 0.00         | 0.01  | 0.23         | 0.46  | 0.03         | 0.05  |
|                              | Sn- Fe1 | 0.57         | 0.90  | 0.53         | 0.76  | 0.39         | 0.55  |
|                              | Sn- Fe2 | 0.04         | 0.03  | 0.30         | 0.40  | 0.40         | 0.55  |
|                              | Sn- Fe3 | 0.39         | 0.54  | 0.38         | 0.55  | 0.43         | 0.01  |
|                              | Sn- Fe4 | 0.39         | 0.53  | 0.48         | 0.61  | 0.44         | 0.01  |

Values for global minimum structures are shown in bold type.

**Table S33.** Metal- Metal Distances, Natural Population Analysis Natural Charges, Metal Electron Configuration, Formal Metal-Metal Bond Orders, and WBIs for the  $\text{SnFe}_4(\text{CO})_n$  ( $n = 16$  to  $12$ ) Structures Using the M06-L/TZP and BP86/DZP Methods.

|                              |         | <b>14S-3</b> |      | <b>14T-1</b> |       | <b>14T-2</b> |       | <b>13S-1</b> |       |
|------------------------------|---------|--------------|------|--------------|-------|--------------|-------|--------------|-------|
|                              |         | M06-X        | BP86 | M06-X        | BP86  | M06-X        | BP86  | M06-X        | BP86  |
| Metal-metal distanc          | Fe1-Fe2 | /            |      | 2.427        | 2.391 | 2.759        | 2.804 | 2.715        | 2.763 |
|                              | Fe3-Fe4 | /            |      | 2.830        | 2.847 | 2.765        | 2.685 | 2.706        | 2.763 |
|                              | Fe1-Fe3 | 2.736        |      | /            | /     | /            | /     | 2.604        | 2.588 |
|                              | Fe1-Fe4 | /            |      | /            | /     | /            | /     | 2.706        | 2.763 |
|                              | Fe2-Fe3 | /            |      | /            | /     | /            | /     | 2.715        | 2.763 |
|                              | Fe2-Fe4 | 2.736        |      | /            | /     | /            | /     | /            | /     |
|                              | Sn- Fe1 | 2.519        |      | 2.556        | 2.504 | 2.479        | 2.419 | 2.601        | 2.536 |
|                              | Sn- Fe2 | 2.465        |      | 2.503        | 2.504 | 2.551        | 2.477 | 2.459        | 2.384 |
|                              | Sn- Fe3 | 2.465        |      | 2.501        | 2.477 | 2.577        | 2.472 | 2.601        | 2.536 |
|                              | Sn- Fe4 | 2.519        |      | 2.486        | 2.477 | 2.433        | 2.406 | 2.454        | 2.384 |
| Metal natural charge         | Fe1     | -0.95        |      | -0.78        | -0.95 | -0.97        | -1.62 | -0.84        | -1.28 |
|                              | Fe2     | -0.47        |      | -0.54        | -0.95 | -0.32        | -0.89 | -0.55        | -1.11 |
|                              | Fe3     | -0.47        |      | -0.49        | -1.50 | -0.94        | -1.37 | -0.84        | -1.28 |
|                              | Fe4     | -0.95        |      | -0.47        | -1.50 | -0.40        | -1.20 | -0.56        | -1.11 |
|                              | Sn      | 0.57         |      | 0.18         | 1.20  | 0.48         | 1.31  | 0.42         | 1.12  |
| Metal electron configuration | Fe1     | 18           |      | 17           | 17    | 18           | 18    | 19           | 19    |
|                              | Fe2     | 16           |      | 17           | 17    | 16           | 16    | 17           | 17    |
|                              | Fe3     | 16           |      | 18           | 18    | 18           | 17    | 19           | 19    |
|                              | Fe4     | 18           |      | 18           | 18    | 16           | 17    | 17           | 17    |
| Formal bond order            | Fe1-Fe2 | /            |      | 2            | 2     | 1            | 1     | 1            | 1     |
|                              | Fe3-Fe4 | /            |      | 1            | 1     | 1            | 1     | 1            | 1     |
|                              | Fe1-Fe3 | 1            |      | /            | /     | /            | /     | 1            | 1     |
|                              | Fe1-Fe4 | /            |      | /            | /     | /            | /     | 1            | 1     |
|                              | Fe2-Fe3 | /            |      | /            | /     | /            | /     | 1            | 1     |
|                              | Fe2-Fe4 | 1            |      | /            | /     | /            | /     | /            | /     |
|                              | Sn- Fe1 | 1            |      | 1            | 1     | 1            | 1     | 1            | 1     |
|                              | Sn- Fe2 | 1            |      | 1            | 1     | 1            | 1     | 1            | 1     |
|                              | Sn- Fe3 | 1            |      | 1            | 1     | 1            | 1     | 1            | 1     |
|                              | Sn- Fe4 | 1            |      | 1            | 1     | 1            | 1     | 1            | 1     |
| Wiberg bond index            | Fe1-Fe2 | 0.05         |      | 0.22         | 0.52  | 0.05         | 0.38  | 0.22         | 0.43  |
|                              | Fe3-Fe4 | 0.05         |      | 0.18         | 0.37  | 0.04         | 0.33  | 0.22         | 0.43  |
|                              | Fe1-Fe3 | 0.20         |      | 0.03         | 0.06  | 0.01         | 0.08  | 0.16         | 0.34  |
|                              | Fe1-Fe4 | 0.05         |      | 0.03         | 0.05  | 0.02         | 0.09  | 0.22         | 0.43  |
|                              | Fe2-Fe3 | 0.07         |      | 0.03         | 0.05  | 0.04         | 0.33  | 0.22         | 0.43  |
|                              | Fe2-Fe4 | 0.20         |      | 0.05         | 0.06  | 0.01         | 0.07  | 0.15         | 0.23  |
|                              | Sn- Fe1 | 0.37         |      | 0.32         | 0.51  | 0.10         | 0.66  | 0.34         | 0.39  |
|                              | Sn- Fe2 | 0.54         |      | 0.38         | 0.51  | 0.07         | 0.46  | 0.50         | 0.71  |
|                              | Sn- Fe3 | 0.54         |      | 0.38         | 0.56  | 0.08         | 0.49  | 0.34         | 0.39  |
|                              | Sn- Fe4 | 0.37         |      | 0.40         | 0.56  | 0.13         | 0.66  | 0.51         | 0.71  |

Values for global minimum structures are shown in bold type.

**Table S34.** Metal- Metal Distances, Natural Population Analysis Natural Charges, Metal Electron Configuration, Formal Metal-Metal Bond Orders, and WBIs for the  $\text{SnFe}_4(\text{CO})_n$  ( $n = 16$  to  $12$ ) Structures Using the M06-L/TZP and BP86/DZP Methods.

|                              |         | <b>13T-1</b> |       | <b>12S-1</b> |       | <b>12S-2</b> |       | <b>12T-1</b> |      |
|------------------------------|---------|--------------|-------|--------------|-------|--------------|-------|--------------|------|
|                              |         | M06-X        | BP86  | M06-X        | BP86  | M06-X        | BP86  | M06-X        | BP86 |
| Metal-metal distanc          | Fe1-Fe2 | 2.783        | 2.906 | /            | /     | 2.631        | /     | /            |      |
|                              | Fe3-Fe4 | /            | 2.906 | 2.751        | 2.800 | 2.572        | 2.622 | 2.619        |      |
|                              | Fe1-Fe3 | 2.561        | 2.535 | 2.722        | 2.763 | 2.973        | 2.395 | 2.413        |      |
|                              | Fe1-Fe4 | 2.829        | 2.906 | 2.635        | 2.646 | 2.519        | 2.703 | 2.674        |      |
|                              | Fe2-Fe3 | 2.731        | 2.906 | 2.635        | 2.646 | /            | 2.435 | 2.417        |      |
|                              | Fe2-Fe4 | /            | /     | 2.722        | 2.763 | 2.849        | 2.686 | 2.603        |      |
|                              | Sn- Fe1 | 2.618        | 2.569 | 2.446        | 2.394 | 2.782        | 2.613 | 2.613        |      |
|                              | Sn- Fe2 | 2.455        | 2.393 | 2.446        | 2.394 | 2.393        | 2.687 | 2.681        |      |
|                              | Sn- Fe3 | 2.640        | 2.569 | 2.495        | 2.427 | 2.430        | 2.790 | 2.727        |      |
|                              | Sn- Fe4 | 2.481        | 2.393 | 2.495        | 2.427 | 2.532        | 2.603 | 2.550        |      |
| Metal natural charge         | Fe1     | -0.56        | -1.20 | -0.67        | -1.22 | -0.45        | -0.36 | -1.18        |      |
|                              | Fe2     | -0.45        | -1.04 | -0.67        | -1.22 | -0.70        | -0.56 | -0.79        |      |
|                              | Fe3     | -0.53        | -1.20 | -0.59        | -0.99 | -0.70        | -0.35 | -0.96        |      |
|                              | Fe4     | -0.65        | -1.04 | -0.59        | -0.99 | -0.57        | -0.67 | -0.95        |      |
|                              | Sn      | 0.24         | 1.09  | 0.44         | 1.14  | 0.44         | 0.19  | 0.95         |      |
| Metal electron configuration | Fe1     | 19           | 19    | 17           | 17    | 17           | 18    | 18           |      |
|                              | Fe2     | 17           | 17    | 17           | 17    | 18           | 18    | 18           |      |
|                              | Fe3     | 18           | 19    | 18           | 18    | 18           | 18    | 18           |      |
|                              | Fe4     | 16           | 17    | 18           | 18    | 17           | 18    | 18           |      |
| Formal bond order            | Fe1-Fe2 | 1            | 1     | /            | /     | 1            | /     | /            |      |
|                              | Fe3-Fe4 | /            | /     | 1            | 1     | 1            | 1     | 1            |      |
|                              | Fe1-Fe3 | 1            | 1     | 1            | 1     | 1            | 1     | 1            |      |
|                              | Fe1-Fe4 | 1            | 1     | 1            | 1     | 1            | 1     | 1            |      |
|                              | Fe2-Fe3 | 1            | 1     | 1            | 1     | /            | 2     | 2            |      |
|                              | Fe2-Fe4 | /            | /     | 1            | 1     | 1            | 1     | 1            |      |
|                              | Sn- Fe1 | 1            | 1     | 1            | 1     | 1            | 1     | 1            |      |
|                              | Sn- Fe2 | 1            | 1     | 1            | 1     | 1            | 1     | 1            |      |
|                              | Sn- Fe3 | 1            | 1     | 1            | 1     | 1            | 1     | 1            |      |
|                              | Sn- Fe4 | 1            | 1     | 1            | 1     | 1            | 1     | 1            |      |
| Wiberg bond index            | Fe1-Fe2 | 0.05         | 0.28  | 0.15         | 0.25  | 0.22         | 0.07  | 0.09         |      |
|                              | Fe3-Fe4 | 0.02         | 0.28  | 0.19         | 0.39  | 0.28         | 0.18  | 0.37         |      |
|                              | Fe1-Fe3 | 0.04         | 0.44  | 0.23         | 0.44  | 0.15         | 0.30  | 0.55         |      |
|                              | Fe1-Fe4 | 0.03         | 0.28  | 0.21         | 0.46  | 0.22         | 0.16  | 0.37         |      |
|                              | Fe2-Fe3 | 0.06         | 0.28  | 0.21         | 0.46  | 0.11         | 0.27  | 0.47         |      |
|                              | Fe2-Fe4 | 0.03         | 0.22  | 0.23         | 0.44  | 0.20         | 0.18  | 0.42         |      |
|                              | Sn- Fe1 | 0.08         | 0.38  | 0.51         | 0.69  | 0.22         | 0.33  | 0.41         |      |
|                              | Sn- Fe2 | 0.13         | 0.72  | 0.51         | 0.69  | 0.60         | 0.24  | 0.29         |      |
|                              | Sn- Fe3 | 0.08         | 0.38  | 0.48         | 0.58  | 0.53         | 0.24  | 0.30         |      |
|                              | Sn- Fe4 | 0.12         | 0.72  | 0.48         | 0.58  | 0.45         | 0.29  | 0.37         |      |

Values for global minimum structures are shown in bold type.

**Table S35.**  $\nu(\text{CO})$  Frequencies (in  $\text{cm}^{-1}$ ) and IR Intensities (in  $\text{km/mol}$ ) in Parentheses for the  $\text{SnFe}_4(\text{CO})_n$  ( $n = 16$  to  $12$ ) Structures are calculated by using the BP86/DZP Method except for **14S-3** and **12S-2** which are calculated by M06-L/TZP because the corresponding isomers are not optimized by BP86/DZP. Bridging  $\nu(\text{CO})$  frequencies are given in bold type, whereas weakly semibridging  $\nu(\text{CO})$  frequencies are given in italic type.

|                           |                                                                                                                                                                                                                                                                                                                                          |
|---------------------------|------------------------------------------------------------------------------------------------------------------------------------------------------------------------------------------------------------------------------------------------------------------------------------------------------------------------------------------|
| <b>16S-1</b> ( $D_{2d}$ ) | 1960.1 (A2, 0.0), 1968.7 (B1, 0.0), 1979.4 (E, 47.6), 1979.4 (E, 47.6), 1988.9 (E, 34.4), 1988.9 (E, 34.4), 1989.2 (A1, 0.0), 1996.5 (E, 716.4), 1996.5 (E, 716.4), 1999.8 (B2, 1044.2), 2014.1 (A1, 0.0), 2014.9 (B2, 483.2), 2033.4 (E, 2182.5), 2033.4 (E, 2182.5), 2053.2 (B2, 1474.2), 2084.0 (A1, 0.0)                             |
| <b>16S-2</b> ( $C_{2v}$ ) | <b>1858.6 (B2, 534.9)</b> , <b>1875.7 (A1, 219.6)</b> , 1968.0 (A2, 0.0), 1981.6 (B2, 241.3), 1986.4 (B1, 69.2), 1991.1 (B2, 500.3), 1991.6 (A2, 0.0), 1993.7 (A1, 1323.4), 1998.0 (B2, 8.7), 2001.3 (A1, 0.9), 2008.0 (B1, 330.7), 2015.3 (A1, 264.1), 2028.9 (B1, 2574.2), 2037.0 (B2, 1773.7), 2046.5 (A1, 1473.3), 2083.3 (A1, 92.7) |
| <b>15S-1</b> ( $C_2$ )    | <b>1834.3 (A, 372.2)</b> , 1954.6 (A, 4.7), 1963.2 (B, 96.8), 1971.0 (A, 28.0), 1983.5 (B, 85.1), 1985.9 (B, 25.7), 1991.0 (A, 181.7), 1991.6 (A, 29.4), 1996.8 (B, 488.4), 2003.8 (B, 2690.3), 2007.0 (A, 321.8), 2012.8 (B, 420.4), 2025.5 (A, 2159.3), 2039.8 (B, 2599.9), 2078.1 (A, 0.7)                                            |
| <b>15S-2</b> ( $C_1$ )    | <b>1540.3 (A, 510.5)</b> , <b>1848.6 (A, 335.9)</b> , 1964.9 (A, 235.7), 1972.3 (A, 55.6), 1988.2 (A, 75.2), 1990.6 (A, 172.5), 1993.7 (A, 715.1), 2000.2 (A, 612.2), 2000.7 (A, 161.0), 2002.4 (A, 109.0), 2009.0 (A, 2476.2), 2014.7 (A, 583.3), 2035.3 (A, 1756.9), 2044.8 (A, 1810.2), 2077.7 (A, 234.4)                             |
| <b>15T-1</b> ( $C_1$ )    | 1937.4 (A, 620.7), 1942.7 (A, 302.4), 1960.8 (A, 119.3), 1964.4 (A, 62.9), 1969.4 (A, 105.1), 1981.8 (A, 456.1), 1983.7 (A, 41.5), 1987.3 (A, 566.3), 1991.4 (A, 1603.5), 1999.8 (A, 538.5), 2001.5 (A, 762.8), 2005.6 (A, 524.9), 2029.9 (A, 1729.7), 2030.7 (A, 1918.8), 2071.3 (A, 282.9)                                             |
| <b>14S-1</b> ( $C_1$ )    | <b>1849.3 (A, 342.8)</b> , 1948.9 (A, 296.5), 1956.0 (A, 1.3), 1963.8 (A, 169.7), 1968.0 (A, 195.6), 1975.8 (A, 98.8), 1987.7 (A, 28.9), 2005.2 (A, 248.1), 2007.6 (A, 87.4), 2015.3 (A, 2251.3), 2020.0 (A, 1936.7), 2022.3 (A, 824.1), 2041.4 (A, 2012.5), 2078.6 (A, 282.7)                                                           |
| <b>14S-2</b> ( $C_1$ )    | <i>1898.6 (A, 228.9)</i> , <i>1902.6 (A, 504.8)</i> , 1956.1 (A, 243.0), 1958.5 (A, 213.1), 1971.4 (A, 134.5), 1988.8 (A, 304.5), 1992.8 (A, 457.6), 1997.3 (A, 834.8), 2004.4 (A, 46.1), 2006.9 (A, 1856.4), 2010.3 (A, 94.6), 2018.1 (A, 2412.1), 2035.4 (A, 1805.3), 2074.7 (A, 376.8)                                                |
| <b>14S-3</b> ( $C_2$ )    | 2001 (B, 391), 2004 (A, 116), 2035 (B, 292), 2037 (A, 108), 2047 (B, 272), 2054 (A, 116), 2057 (A, 172), 2060 (B, 354), 2072 (A, 1156), 2073 (B, 446), 2089 (A, 1769), 2096 (B, 2489), 2115 (B, 1560), 2149 (A, 4)                                                                                                                       |
| <b>14T-1</b> ( $C_1$ )    | <i>1885.0 (A, 684.4)</i> , <i>1896.5 (A, 87.6)</i> , 1943.8 (A, 426.3), 1956.9 (A, 340.8), 1966.9 (A, 123.9), 1982.5 (A, 318.4), 1984.9 (A, 441.4), 1996.7 (A, 177.5), 1999.6 (A, 176.6), 2000.8 (A, 2513.1), 2005.0 (A, 120.1), 2013.7 (A, 2420.4), 2030.2 (A, 1707.6), 2070.8 (A, 379.1)                                               |
| <b>14T-2</b> ( $C_1$ )    | <b>1868.8 (A, 412.3)</b> , 1949.8 (A, 54.3), 1956.5 (A, 96.6), 1961.0 (A, 198.2), 1962.7 (A, 27.0), 1980.2 (A, 332.7), 1988.5 (A, 513.8), 1990.3 (A, 735.1), 1994.0 (A, 672.9), 2003.9 (A, 25.8), 2004.9 (A, 1183.5), 2016.7 (A, 2325.2), 2035.1 (A, 2519.0), 2065.9 (A, 101.7)                                                          |
| <b>13S-1</b> ( $C_3$ )    | <b>1873.5 (A', 324.1)</b> , 1961.8 (A'', 24.5), 1966.3 (A', 10.8), 1968.7 (A', 29.1), 1972.4                                                                                                                                                                                                                                             |

- (A", 0.0), 1983.8 (A", 325.0), 1984.6 (A', 606.1), 1990.4 (A", 0.0), 1991.4 (A', 0.4), 2008.1 (A', 1408.0), 2019.4 (A", 2416.1), 2028.1 (A', 2995.0), 2063.8 (A', 99.2)
- 13T-1(C<sub>1</sub>)** **1857.7 (A, 406.6)**, 1950.6 (A, 22.6), 1958.3 (A, 0.7), 1963.6 (A, 2.5), 1964.7 (A, 0.0), 1977.3 (A, 844.2), 1977.8 (A, 1066.2), 1990.0 (A, 71.2), 1994.3 (A, 0.0), 2007.9 (A, 1053.1), 2019.8 (A, 1872.2), 2020.0 (A, 3113.6), 2059.9 (A, 209.2)
- 12T-1(C<sub>1</sub>)** **1840.6 (A, 454.4), 1867.3 (A, 196.0)**, 1923.5 (A, 127.2), 1948.5 (A, 396.0), 1958.6 (A, 11.1), 1963.2 (A, 120.2), 1976.0 (A, 261.0), 1979.9 (A, 1092.8), 1991.0 (A, 550.2), 2003.8 (A, 1969.1), 2011.6 (A, 3093.8), 2045.1 (A, 141.7)
- 12S-1(C<sub>2</sub>)** 1918.1 (A, 89.4), 1919.5 (B, 218.1), 1947.4 (B, 36.2), 1958.7 (A, 279.5), 1973.8 (B, 5.6), 1979.5 (A, 95.4), 1991.5 (B, 11.9), 1995.8 (A, 322.0), 1999.3 (A, 1263.0), 2003.4 (B, 2969.4), 2029.9 (B, 2916.6), 2057.4 (A, 21.9)
- 12S-2(C<sub>1</sub>)** 1946 (A, 268), 1968 (A, 386), 2023 (A, 41), 2030 (A, 190), 2041 (A, 149), 2053 (A, 149), 2066 (A, 491), 2081 (A, 258), 2083 (A, 1560), 2093 (A, 2022), 2108 (A, 3174), 2140 (A, 91)
- 

### Complete Gaussian 09 reference (Reference 15)

Gaussian 09, Revision A.02, Frisch, M. J.; Trucks, G. W.; Schlegel, H. B.; Scuseria, G. E.; Robb, M. A.; Cheeseman, J. R.; Scalmani, G.; Barone, V.; Mennucci, B.; Petersson, G. A.; Nakatsuji, H.; Caricato, M.; Li, X.; Hratchian, H. P.; Izmaylov, A. F.; Bloino, J.; Zheng, G.; Sonnenberg, J. L.; Hada, M.; Ehara, M.; Toyota, K.; Fukuda, R.; Hasegawa, J.; Ishida, M.; Nakajima, T.; Honda, Y.; Kitao, O.; Nakai, H.; Vreven, T.; Montgomery, J. A.; Peralta, J. E.; Ogliaro, F.; Bearpark, M.; Heyd, J. J.; Brothers, E.; Kudin, K. N.; Staroverov, V. N.; Kobayashi, R.; Normand, J.; Raghavachari, K.; Rendell, A.; Burant, J. C.; Iyengar, S. S.; Tomasi, J.; Cossi, M.; Rega, N.; Millam, J. M.; Klene, M.; Knox, J. E.; Cross, J. B.; Bakken, V.; Adamo, C.; Jaramillo, J.; Gomperts, R.; Stratmann, R. E.; Yazyev, O.; Austin, A. J.; Cammi, R.; Pomelli, C.; Ochterski, J. W.; Martin, R. L.; Morokuma, K.; Zakrzewski, V. G.; Voth, G. A.; Salvador, P.; Dannenberg, J. J.; Dapprich, S.; Daniels, A. D.; Farkas, O.; Foresman, J. B.; Ortiz, J. V.; Cioslowski, J.; Fox, D. J. Gaussian, Inc., Wallingford CT, 2009.
